# Supplementary material for: Spirodesertols A and B, two highly modified spirocyclic diterpenoids with an unprecedented 6-isopropyl-3H-spiro[benzofuran-2,1′-cyclohexane] motif from Salvia deserta
Source: Royal Society of Chemistry journal article supplement (doi:10.1039/d0qo00735h), 2020-01-01
Supplement: d0qo00735h1.pdf [file d0qo00735h1.pdf]

# Electronic Supplementary Information (ESI)

## Spirodesertols A and B, two highly modified spirocyclic diterpenoids with an unprecedented 6-isopropyl-3*H*-spiro[benzofuran-2,1'-cyclohexane] motif from *Salvia deserta*

Guijuan Zheng,<sup>†, b</sup> Abdulkriem Kadir,<sup>†, a, b</sup> Xiaofeng Zheng,<sup>†, b</sup> Pengfei Jin,<sup>b</sup> Junjun Liu,<sup>b</sup> Maitinuer Maiwulanjiang,<sup>a</sup> Guangmin Yao,<sup>\*, b</sup> and Haji Akber Aisa<sup>\*, a</sup>

*a* Key Laboratory of Plant Resources and Chemistry of Arid Zone, Xinjiang Technical Institute of Physics and Chemistry, Chinese Academy of Sciences, Urumqi, Xinjiang 830011, People's Republic of China.

*b* Hubei Key Laboratory of Natural Medicinal Chemistry and Resource Evaluation, School of Pharmacy, Tongji Medical College, Huazhong University of Science and Technology, Wuhan 430030, China.

### Contents

|                                                                                                                                                                   |    |
|-------------------------------------------------------------------------------------------------------------------------------------------------------------------|----|
| <b>Table S1.</b> <sup>1</sup> H (400 MHz) and <sup>13</sup> C NMR (100 MHz) spectroscopic data for spirodesertols A (1) and B (2) in chloroform- <i>d</i> . ..... | 4  |
| <b>Table S2.</b> DP4+ probability of <sup>13</sup> C NMR chemical shift of 2. ....                                                                                | 5  |
| <b>Table S3.</b> <sup>1</sup> H (400 MHz) and <sup>13</sup> C NMR (100 MHz) spectroscopic data for salviadenones A–D (3–6) in chloroform- <i>d</i> . ....         | 6  |
| <b>Table S4.</b> Cytotoxicity activities of compounds 1–7 against five cancer cell lines (IC <sub>50</sub> in μM) <sup>a</sup> .....                              | 7  |
| <b>Figure S1.</b> Key <sup>1</sup> H– <sup>1</sup> H COSY, HMBC and NOESY correlations of spirodesertol B (2). ....                                               | 8  |
| <b>Figure S2.</b> Key <sup>1</sup> H– <sup>1</sup> H COSY, HMBC and NOESY correlations of salviadenone A (3). ....                                                | 8  |
| <b>Figure S3.</b> Key <sup>1</sup> H– <sup>1</sup> H COSY, HMBC and NOESY correlations of salviadenone B (4). ....                                                | 8  |
| <b>Figure S4.</b> Key <sup>1</sup> H– <sup>1</sup> H COSY, HMBC and NOESY correlations of salviadenone C (5). ....                                                | 9  |
| <b>Figure S5.</b> Key <sup>1</sup> H– <sup>1</sup> H COSY, HMBC and NOESY correlations of salviadenone D (6). ....                                                | 9  |
| <b>Figure S6.</b> View of the molecule of 1 with the atom-labeling scheme (displacement ellipsoids are drawn at 10% the probability level) .....                  | 10 |
| <b>Table S5.</b> Crystal data and structure refinement for 1. ....                                                                                                | 11 |
| <b>Figure S7.</b> View of the molecule of 3 with the atom-labeling scheme (displacement ellipsoids are drawn at 10% the probability level) .....                  | 12 |
| <b>Table S6.</b> Crystal data and structure refinement for 3. ....                                                                                                | 13 |
| <b>Figure S8.</b> View of the molecule of 4 with the atom-labeling scheme (displacement ellipsoids are drawn at 10% the probability level) .....                  | 14 |
| <b>Table S7.</b> Crystal data and structure refinement for 4. ....                                                                                                | 15 |

\* To whom correspondence should be addressed. E-mails: gyap@mail.hust.edu.cn (G. Yao), haji@ms.xjb.ac.cn (H. A. Aisa)

† These authors contributed equally to this work.

|                                                                                                                                                                          |    |
|--------------------------------------------------------------------------------------------------------------------------------------------------------------------------|----|
| <b>Table S8.</b> Important thermodynamic parameters (a.u.) and Boltzmann distributions of the optimized compound <b>1</b> at B3LYP/6-31G (d) level in methanol.....      | 16 |
| <b>Table S9.</b> Optimized coordinate of compound <b>1</b> at B3LYP/6-31G (d) level in the methanol.....                                                                 | 16 |
| <b>Table S10.</b> Important thermodynamic parameters (a.u.) and Boltzmann distributions of the optimized compound <i>ent-1</i> at B3LYP/6-31G (d) level in methanol..... | 17 |
| <b>Table S11.</b> Optimized coordinate of compound <i>ent-1</i> at B3LYP/6-31G (d) level in the methanol.....                                                            | 18 |
| <b>Table S12.</b> Important thermodynamic parameters (a.u.) and Boltzmann distributions of the optimized compound <b>2</b> at B3LYP/6-31G (d) level in methanol.....     | 19 |
| <b>Table S13.</b> Optimized coordinate of compound <b>2</b> at B3LYP/6-31G (d) level in the methanol.....                                                                | 19 |
| <b>Table S14.</b> Important thermodynamic parameters (a.u.) and Boltzmann distributions of the optimized compound <i>ent-2</i> at B3LYP/6-31G (d) level in methanol..... | 22 |
| <b>Table S15.</b> Optimized coordinate of compound <i>ent-2</i> at B3LYP/6-31G (d) level in the methanol.....                                                            | 22 |
| <b>Figure S9.</b> The HRESIMS spectrum of compound <b>1</b> .....                                                                                                        | 24 |
| <b>Figure S10.</b> The UV spectrum of compound <b>1</b> .....                                                                                                            | 24 |
| <b>Figure S11.</b> The IR spectrum of compound <b>1</b> .....                                                                                                            | 25 |
| <b>Figure S12.</b> <sup>1</sup> H NMR spectrum of compound <b>1</b> (400 MHz, chloroform- <i>d</i> ).....                                                                | 25 |
| <b>Figure S13.</b> <sup>13</sup> C NMR spectrum of compound <b>1</b> (100 MHz, chloroform- <i>d</i> ) .....                                                              | 26 |
| <b>Figure S14.</b> DEPT-135 spectrum of compound <b>1</b> (100 MHz, chloroform- <i>d</i> ).....                                                                          | 26 |
| <b>Figure S15.</b> HSQC spectrum of compound <b>1</b> ( <sup>1</sup> H: 400 MHz, <sup>13</sup> C: 100 MHz, chloroform- <i>d</i> ) .....                                  | 27 |
| <b>Figure S16.</b> HMBC spectrum of compound <b>1</b> ( <sup>1</sup> H: 400 MHz, <sup>13</sup> C: 100 MHz, chloroform- <i>d</i> ).....                                   | 27 |
| <b>Figure S17.</b> <sup>1</sup> H- <sup>1</sup> H COSY spectrum of compound <b>1</b> (400 MHz, chloroform- <i>d</i> ) .....                                              | 28 |
| <b>Figure S18.</b> NOESY spectrum of compound <b>1</b> (400 MHz, chloroform- <i>d</i> ).....                                                                             | 28 |
| <b>Figure S19.</b> The HRESIMS spectrum of compound <b>2</b> .....                                                                                                       | 29 |
| <b>Figure S20.</b> The UV spectrum of compound <b>2</b> .....                                                                                                            | 29 |
| <b>Figure S21.</b> The IR spectrum of compound <b>2</b> .....                                                                                                            | 30 |
| <b>Figure S22.</b> <sup>1</sup> H NMR spectrum of compound <b>2</b> (400 MHz, chloroform- <i>d</i> ).....                                                                | 30 |
| <b>Figure S23.</b> <sup>13</sup> C NMR spectrum of compound <b>2</b> (100 MHz, chloroform- <i>d</i> ) .....                                                              | 31 |
| <b>Figure S24.</b> DEPT spectrum of compound <b>2</b> (100 MHz, chloroform- <i>d</i> ).....                                                                              | 31 |
| <b>Figure S25.</b> HSQC spectrum of compound <b>2</b> ( <sup>1</sup> H: 400 MHz, <sup>13</sup> C: 100 MHz, chloroform- <i>d</i> ) .....                                  | 32 |
| <b>Figure S26.</b> HMBC spectrum of compound <b>2</b> ( <sup>1</sup> H: 400 MHz, <sup>13</sup> C: 100 MHz, chloroform- <i>d</i> ).....                                   | 32 |
| <b>Figure S27.</b> <sup>1</sup> H- <sup>1</sup> H COSY spectrum of compound <b>2</b> (400 MHz, chloroform- <i>d</i> ) .....                                              | 33 |
| <b>Figure S28.</b> NOESY spectrum of compound <b>2</b> (400 MHz, chloroform- <i>d</i> ).....                                                                             | 33 |
| <b>Figure S29.</b> The HRESIMS spectrum of compound <b>3</b> .....                                                                                                       | 34 |
| <b>Figure S30.</b> The UV spectrum of compound <b>3</b> .....                                                                                                            | 34 |
| <b>Figure S31.</b> The IR spectrum of compound <b>3</b> .....                                                                                                            | 35 |
| <b>Figure S32.</b> <sup>1</sup> H NMR spectrum of compound <b>3</b> (400 MHz, chloroform- <i>d</i> ).....                                                                | 35 |
| <b>Figure S33.</b> <sup>13</sup> C NMR spectrum of compound <b>3</b> (100 MHz, chloroform- <i>d</i> ) .....                                                              | 36 |
| <b>Figure S34.</b> DEPT-135 spectrum of compound <b>3</b> (100 MHz, chloroform- <i>d</i> ).....                                                                          | 36 |
| <b>Figure S35.</b> HSQC spectrum of compound <b>3</b> ( <sup>1</sup> H: 400 MHz, <sup>13</sup> C: 100 MHz, chloroform- <i>d</i> ) .....                                  | 37 |
| <b>Figure S36.</b> HMBC spectrum of compound <b>3</b> ( <sup>1</sup> H: 400 MHz, <sup>13</sup> C: 100 MHz, chloroform- <i>d</i> ).....                                   | 37 |

|                                                                                                                                         |    |
|-----------------------------------------------------------------------------------------------------------------------------------------|----|
| <b>Figure S37.</b> $^1\text{H}$ - $^1\text{H}$ COSY spectrum of compound <b>3</b> (400 MHz, chloroform- <i>d</i> ) .....                | 38 |
| <b>Figure S38.</b> NOESY spectrum of compound <b>3</b> (400 MHz, chloroform- <i>d</i> ).....                                            | 38 |
| <b>Figure S39.</b> The HRESIMS spectrum of compound <b>4</b> .....                                                                      | 39 |
| <b>Figure S40.</b> The UV spectrum of compound <b>4</b> .....                                                                           | 39 |
| <b>Figure S41.</b> The IR spectrum of compound <b>4</b> .....                                                                           | 40 |
| <b>Figure S42.</b> $^1\text{H}$ NMR spectrum of compound <b>4</b> (400 MHz, chloroform- <i>d</i> ).....                                 | 40 |
| <b>Figure S43.</b> $^{13}\text{C}$ NMR spectrum of compound <b>4</b> (100 MHz, chloroform- <i>d</i> ) .....                             | 41 |
| <b>Figure S44.</b> DEPT-135 spectrum of compound <b>4</b> (100 MHz, chloroform- <i>d</i> ).....                                         | 41 |
| <b>Figure S45.</b> HSQC spectrum of compound <b>4</b> ( $^1\text{H}$ : 400 MHz, $^{13}\text{C}$ : 100 MHz, chloroform- <i>d</i> ) ..... | 42 |
| <b>Figure S46.</b> HMBC spectrum of compound <b>4</b> ( $^1\text{H}$ : 400 MHz, $^{13}\text{C}$ : 100 MHz, chloroform- <i>d</i> ).....  | 42 |
| <b>Figure S47.</b> $^1\text{H}$ - $^1\text{H}$ COSY spectrum of compound <b>4</b> (400 MHz, chloroform- <i>d</i> ) .....                | 43 |
| <b>Figure S48.</b> NOESY spectrum of compound <b>4</b> (400 MHz, chloroform- <i>d</i> ).....                                            | 43 |
| <b>Figure S49.</b> The HRESIMS spectrum of compound <b>5</b> .....                                                                      | 44 |
| <b>Figure S50.</b> The UV spectrum of compound <b>5</b> .....                                                                           | 44 |
| <b>Figure S51.</b> The IR spectrum of compound <b>5</b> .....                                                                           | 45 |
| <b>Figure S52.</b> $^1\text{H}$ NMR spectrum of compound <b>5</b> (400 MHz, chloroform- <i>d</i> ).....                                 | 45 |
| <b>Figure S53.</b> $^{13}\text{C}$ NMR spectrum of compound <b>5</b> (100 MHz, chloroform- <i>d</i> ) .....                             | 46 |
| <b>Figure S54.</b> DEPT-135 spectrum of compound <b>5</b> (100 MHz, chloroform- <i>d</i> ).....                                         | 46 |
| <b>Figure S55.</b> HSQC spectrum of compound <b>5</b> ( $^1\text{H}$ : 400 MHz, $^{13}\text{C}$ : 100 MHz, chloroform- <i>d</i> ) ..... | 47 |
| <b>Figure S56.</b> HMBC spectrum of compound <b>5</b> ( $^1\text{H}$ : 400 MHz, $^{13}\text{C}$ : 100 MHz, chloroform- <i>d</i> ).....  | 47 |
| <b>Figure S57.</b> $^1\text{H}$ - $^1\text{H}$ COSY spectrum of compound <b>5</b> (400 MHz, chloroform- <i>d</i> ) .....                | 48 |
| <b>Figure S58.</b> NOESY spectrum of compound <b>5</b> (400 MHz, chloroform- <i>d</i> ).....                                            | 48 |
| <b>Figure S59.</b> The HRESIMS spectrum of compound <b>6</b> .....                                                                      | 49 |
| <b>Figure S60.</b> The UV spectrum of compound <b>6</b> .....                                                                           | 49 |
| <b>Figure S61.</b> The IR spectrum of compound <b>6</b> .....                                                                           | 50 |
| <b>Figure S62.</b> $^1\text{H}$ NMR spectrum of compound <b>6</b> (400 MHz, chloroform- <i>d</i> ).....                                 | 50 |
| <b>Figure S63.</b> $^{13}\text{C}$ NMR spectrum of compound <b>6</b> (100 MHz, chloroform- <i>d</i> ) .....                             | 51 |
| <b>Figure S64.</b> DEPT-135 spectrum of compound <b>6</b> (100 MHz, chloroform- <i>d</i> ).....                                         | 51 |
| <b>Figure S65.</b> HSQC spectrum of compound <b>6</b> ( $^1\text{H}$ : 400 MHz, $^{13}\text{C}$ : 100 MHz, chloroform- <i>d</i> ) ..... | 52 |
| <b>Figure S66.</b> HMBC spectrum of compound <b>6</b> ( $^1\text{H}$ : 400 MHz, $^{13}\text{C}$ : 100 MHz, chloroform- <i>d</i> ).....  | 52 |
| <b>Figure S67.</b> $^1\text{H}$ - $^1\text{H}$ COSY spectrum of compound <b>6</b> (400 MHz, chloroform- <i>d</i> ) .....                | 53 |
| <b>Figure S68.</b> NOESY spectrum of compound <b>6</b> (400 MHz, chloroform- <i>d</i> ).....                                            | 53 |
| <b>Figure S69.</b> $^1\text{H}$ NMR spectrum of compound <b>7</b> (400 MHz, chloroform- <i>d</i> ).....                                 | 54 |
| <b>Figure S70.</b> $^{13}\text{C}$ NMR spectrum of compound <b>7</b> (100 MHz, chloroform- <i>d</i> ) .....                             | 54 |

**Table S1.**  $^1\text{H}$  (400 MHz) and  $^{13}\text{C}$  NMR (100 MHz) spectroscopic data for spirodesertols A (**1**) and B (**2**) in chloroform-*d*.

| no.        | <b>1</b>                              |                     | <b>2</b>                              |                     |
|------------|---------------------------------------|---------------------|---------------------------------------|---------------------|
|            | $\delta_{\text{H}}$ ( <i>J</i> in Hz) | $\delta_{\text{C}}$ | $\delta_{\text{H}}$ ( <i>J</i> in Hz) | $\delta_{\text{C}}$ |
| 1 $\alpha$ | 1.64, overlap                         | 38.4                | 1.48, overlap                         | 38.0                |
| 1 $\beta$  | 1.92, dt (13.1, 3.1)                  |                     | 2.08, dt (13.6, 3.8)                  |                     |
| 2 $\alpha$ | 1.70, m                               | 19.0                | 1.61, m                               | 18.6                |
| 2 $\beta$  | 1.70, m                               |                     | 1.93, m                               |                     |
| 3 $\alpha$ | 1.37, m                               | 40.2                | 1.34, m                               | 40.2                |
| 3 $\beta$  | 1.47, dt (13.9, 3.4)                  |                     | 1.56, overlap                         |                     |
| 4          |                                       | 35.7                |                                       | 34.8                |
| 5          | 2.59, d (3.4)                         | 65.1                | 2.15, d (4.8)                         | 65.7                |
| 6          | 9.89, d (3.4)                         | 203.6               | 9.74, d (4.8)                         | 204.5               |
| 7          | 9.83, s                               | 191.8               | 9.80, s                               | 191.7               |
| 8          |                                       | 125.2               |                                       | 124.3               |
| 9          |                                       | 126.1               |                                       | 126.0               |
| 10         |                                       | 92.5                |                                       | 91.6                |
| 11         |                                       | 145.8               |                                       | 146.6               |
| 12         |                                       | 143.1               |                                       | 143.0               |
| 13         |                                       | 135.3               |                                       | 135.4               |
| 14         | 7.16, s                               | 125.1               | 7.17, s                               | 125.2               |
| 15         | 3.26, sept (7.0)                      | 27.1                | 3.28, sept (7.0)                      | 27.2                |
| 16         | 1.24, d (7.0)                         | 22.7                | 1.25, d (7.0)                         | 22.7                |
| 17         | 1.24, d (7.0)                         | 22.7                | 1.25, d (7.0)                         | 22.7                |
| 18         | 1.13, s                               | 23.5                | 1.27, s                               | 24.1                |
| 19         | 1.16, s                               | 31.3                | 1.03, s                               | 31.5                |
| 20a        | 3.75, d (17.2)                        | 38.7                | 3.42, d (17.5)                        | 43.3                |
| 20b        | 3.44, d (17.2)                        |                     | 3.36, d (17.5)                        |                     |

**Table S2.** DP4+ probability of  $^{13}\text{C}$  NMR chemical shift of **2**.

| Plausible isomers           | DP4+ probability of $^{13}\text{C}$ NMR data of <b>2</b> |                          |
|-----------------------------|----------------------------------------------------------|--------------------------|
|                             | <i>5S*</i> , <i>10S*</i>                                 | <i>5S*</i> , <i>10R*</i> |
| Bayer's theorem probability | 100.00%                                                  | 0.00%                    |

**Table S3.** <sup>1</sup>H (400 MHz) and <sup>13</sup>C NMR (100 MHz) spectroscopic data for salviadenones A–D (**3–6**) in chloroform-*d*.

| no.        | <b>3</b>                              |                     | <b>4</b>                              |                     | <b>5</b>                              |                     | <b>6</b>                              |                     |
|------------|---------------------------------------|---------------------|---------------------------------------|---------------------|---------------------------------------|---------------------|---------------------------------------|---------------------|
|            | $\delta_{\text{H}}$ ( <i>J</i> in Hz) | $\delta_{\text{C}}$ |
| 1 $\alpha$ | 5.70, br. s                           | 122.6               | 3.64, ddd (15.9, 10.9, 5.1)           | 73.6                | 6.93, t (3.8)                         | 137.8               | 6.56, s                               | 128.6               |
| 2 $\alpha$ | 1.91, m                               | 23.2                | 1.84, overlap                         | 29.3                | 2.26, m                               | 24.3                |                                       | 199.9               |
| 2 $\beta$  | 2.02, m                               |                     | 2.32, td (13.6, 3.6)                  |                     | 2.31, m                               |                     |                                       |                     |
| 3 $\alpha$ | 1.33, overlap                         | 37.3                | 1.32, td (13.6, 3.6)                  | 40.6                | 1.63, dt (12.0, 6.9)                  | 29.2                | 2.16, d (17.6)                        | 46.6                |
| 3 $\beta$  | 1.33, overlap                         |                     | 1.54, dt (13.6, 3.6)                  |                     | 1.21, overlap                         |                     | 2.62, d (17.6)                        |                     |
| 4          |                                       | 32.5                |                                       | 34.2                |                                       | 31.9                |                                       | 36.0                |
| 5          | 2.10, br. d (12.5)                    | 43.0                | 1.84, overlap                         | 47.6                | 1.86, dd (13.3, 8.3)                  | 42.7                | 2.25, dd (9.5, 8.5)                   | 44.4                |
| 6 $\alpha$ | 2.82, d (17.5)                        | 43.0                | 2.24, m                               | 28.3                | 1.59, m                               | 30.9                | 1.95, m                               | 27.7                |
| 6 $\beta$  | 2.53, dd (17.5, 12.5)                 |                     | 1.40, m                               |                     | 1.90, m                               |                     | 2.00, m                               |                     |
| 7 $\alpha$ |                                       | 205.0               | 2.92, overlap                         | 33.9                | 2.72, m                               | 32.5                | 2.76, m                               | 32.4                |
| 7 $\beta$  |                                       |                     | 2.92, overlap                         |                     | 2.64, ddd (13.3, 5.8, 2.5)            |                     | 2.77, m                               |                     |
| 8          |                                       | 129.9               |                                       | 138.2               |                                       | 133.7               |                                       | 132.9               |
| 9          |                                       | 125.3               |                                       | 118.6               |                                       | 117.7               |                                       | 116.8               |
| 10         |                                       | 135.0               | 3.44, t (5.1)                         | 53.3                |                                       | 141.7               |                                       | 159.9               |
| 11         |                                       | 140.2               |                                       | 151.2               |                                       | 148.8               |                                       | 149.6               |
| 12         |                                       | 146.9               |                                       | 140.6               |                                       | 140.8               |                                       | 141.2               |
| 13         |                                       | 132.7               |                                       | 140.2               |                                       | 140.1               |                                       | 141.9               |
| 14         | 7.40, s                               | 120.1               | 6.54, s                               | 118.4               | 6.51, s                               | 117.5               | 6.56, s                               | 118.4               |
| 15         | 3.11, sept (7.0)                      | 27.5                | 3.28, sept (6.9)                      | 27.7                | 3.30, sept (6.8)                      | 27.8                | 3.33, sept (6.9)                      | 27.9                |
| 16         | 1.22, d (7.0)                         | 22.6                | 1.19, d (6.9)                         | 22.1                | 1.23, d (6.8)                         | 22.2                | 1.23, d (6.9)                         | 22.1                |
| 17         | 1.22, d (7.0)                         | 22.6                | 1.22, d (6.9)                         | 22.1                | 1.24, d (6.8)                         | 22.3                | 1.24, d (6.9)                         | 22.2                |
| 18         | 0.76, s                               | 19.6                | 0.69, s                               | 19.7                | 0.81, s                               | 26.5                | 1.04, s                               | 27.1                |
| 19         | 0.94, s                               | 29.5                | 0.84, s                               | 30.6                | 0.90, s                               | 27.9                | 1.01, s                               | 28.2                |
| 20a        | 3.42, d (15.0)                        | 33.7                |                                       | 210.7               |                                       | 201.0               |                                       | 200.5               |
| 20b        | 3.74, d (15.0)                        |                     |                                       |                     |                                       |                     |                                       |                     |
| 11-OH      |                                       |                     | 13.31, s                              |                     |                                       |                     | 11.85, s                              |                     |
| 12-OH      |                                       |                     | 5.95, s                               |                     |                                       |                     | 5.72, s                               |                     |

**Table S4.** Cytotoxicity activities of compounds **1–7** against five cancer cell lines (IC<sub>50</sub> in  $\mu\text{M}$ )<sup>a</sup>

| Comp.                          | A-549        | SMMC-7721    | HL-60        | MCF-7        | SW480        | BEAS-2B    | Highest index of selectivity <sup>b</sup> |
|--------------------------------|--------------|--------------|--------------|--------------|--------------|------------|-------------------------------------------|
| <b>1</b>                       | 6.60 ± 0.35  | 7.13 ± 0.22  | 11.32 ± 0.31 | 11.50 ± 0.49 | 18.20 ± 1.21 | >40        | >6.06                                     |
| <b>2</b>                       | 18.00 ± 0.30 | 13.64 ± 0.27 | 18.42 ± 1.10 | 18.21 ± 0.76 | 21.65 ± 1.35 | >40        | >2.93                                     |
| <b>3</b>                       | >40          | 31.98±3.09   | 17.70±0.83   | 26.90±1.52   | 28.79±2.67   | 30.37±0.45 | >1.72                                     |
| <b>4</b>                       | >40          | >40          | >40          | >40          | >40          | >40        | N/A                                       |
| <b>5</b>                       | >40          | >40          | >40          | >40          | >40          | >40        | N/A                                       |
| <b>6</b>                       | >40          | >40          | >40          | >40          | >40          | >40        | N/A                                       |
| <b>7</b>                       | >40          | 32.70±2.91   | 15.15±0.29   | >40          | 24.79±0.29   | >40        | >2.64                                     |
| <b>cis-platin</b> <sup>c</sup> | 13.84 ± 0.47 | 7.82 ± 0.62  | 2.47 ± 0.12  | 13.46 ± 0.49 | 10.06 ± 0.30 | >40        | >16.19                                    |

<sup>a</sup> Values are expressed as the means ± SD,  $n = 3$ .

<sup>b</sup> Highest index of selectivity is the ratio of the IC<sub>50</sub> value for the Beas-2B cell line over the lowest cancer cell IC<sub>50</sub> value.

<sup>c</sup> *Cis*-platin was used as the positive control.

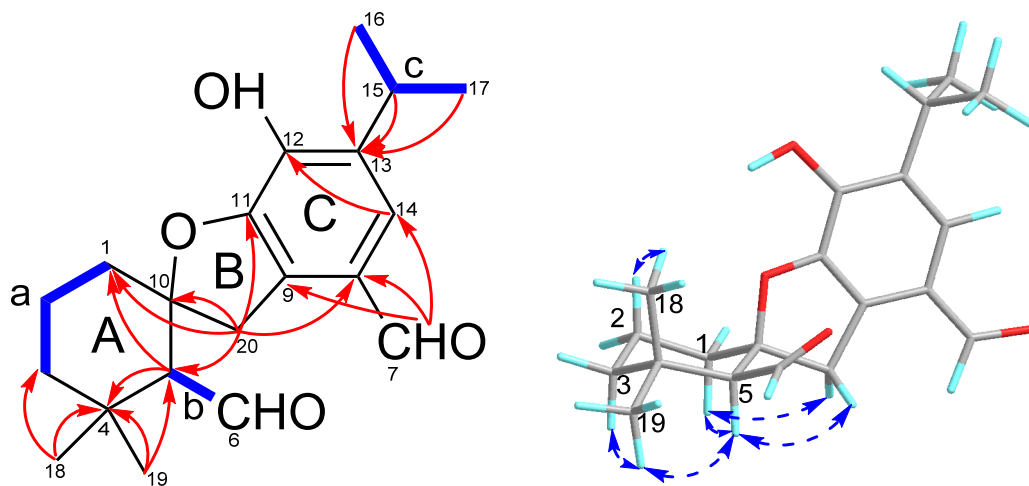

$^1\text{H}-^1\text{H}$  COSY: — HMBC: H C NOESY: H H

Figure S1. Key  $^1\text{H}-^1\text{H}$  COSY, HMBC and NOESY correlations of spirodesertol B (2).

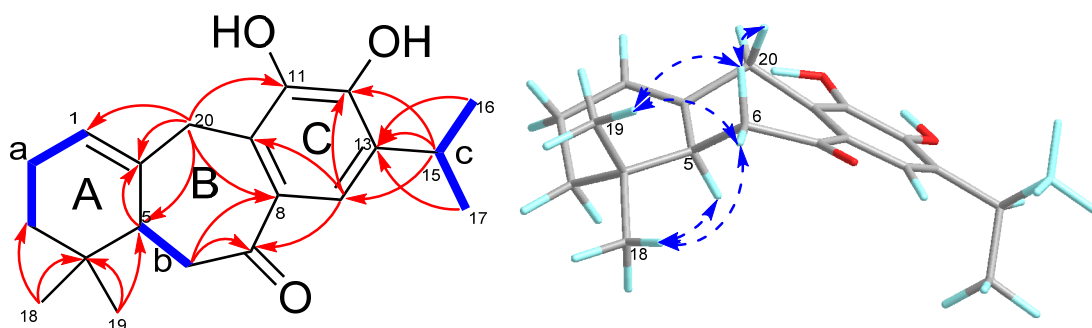

$^1\text{H}-^1\text{H}$  COSY: — HMBC: H C NOESY: H H

Figure S2. Key  $^1\text{H}-^1\text{H}$  COSY, HMBC and NOESY correlations of salviadenone A (3).

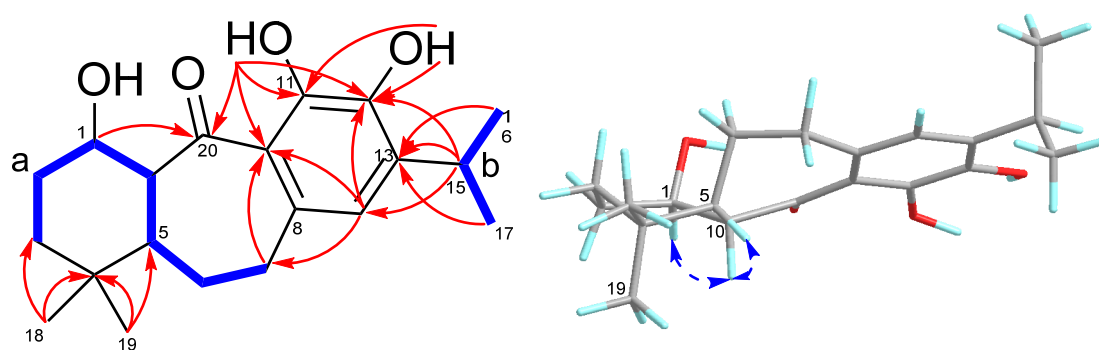

$^1\text{H}-^1\text{H}$  COSY: — HMBC: H C NOESY: H H

Figure S3. Key  $^1\text{H}-^1\text{H}$  COSY, HMBC and NOESY correlations of salviadenone B (4).



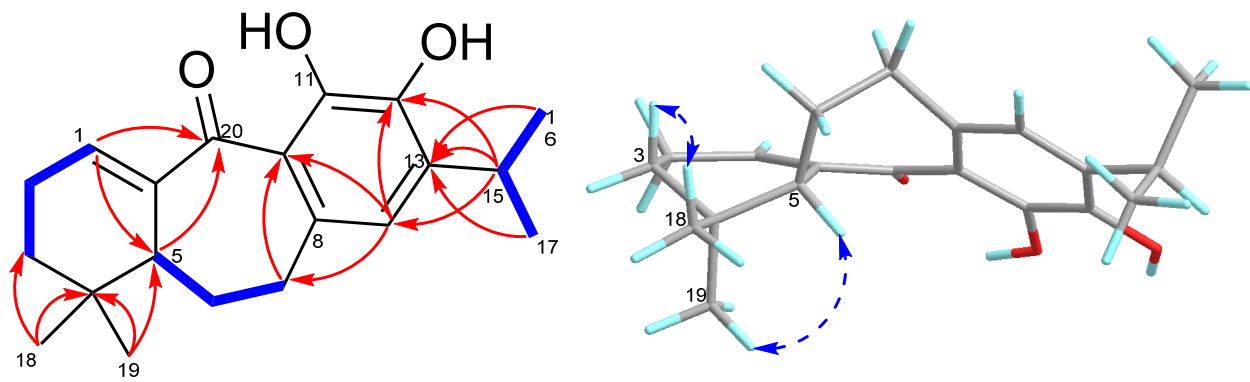

$^1\text{H}-^1\text{H}$  COSY: — HMBC: H C NOESY: H H

Figure S4. Key  $^1\text{H}-^1\text{H}$  COSY, HMBC and NOESY correlations of salviadenone C (5).

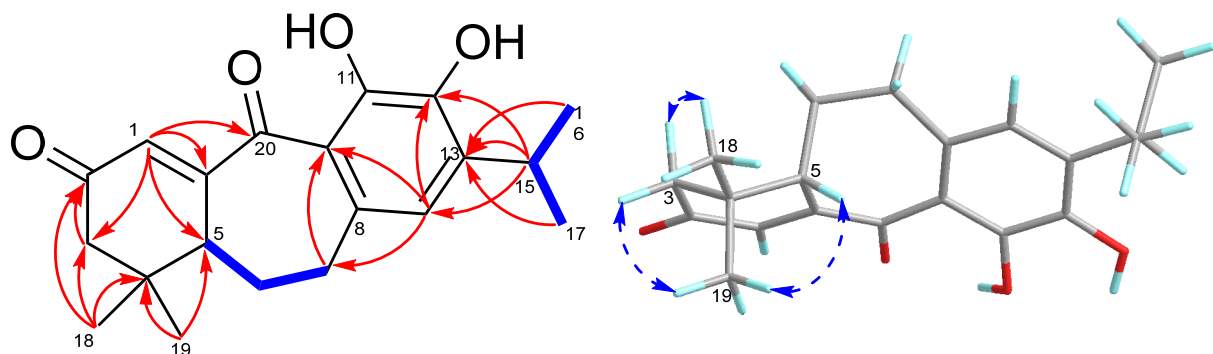

$^1\text{H}-^1\text{H}$  COSY: — HMBC: H C NOESY: H H

Figure S5. Key  $^1\text{H}-^1\text{H}$  COSY, HMBC and NOESY correlations of salviadenone D (6).

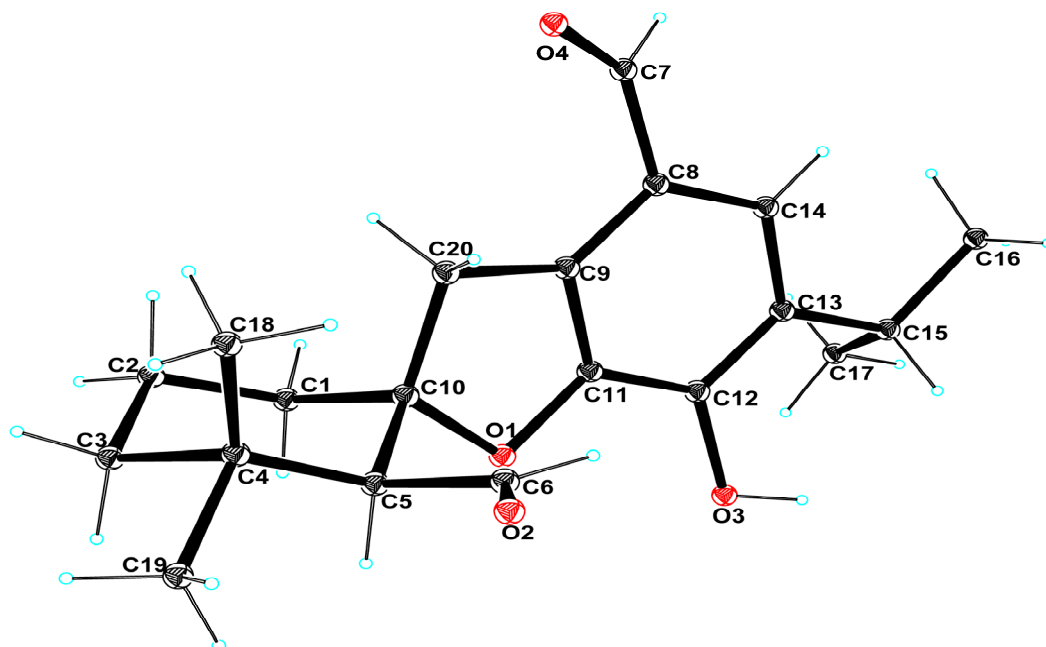

**Figure S6.** View of the molecule of **1** with the atom-labeling scheme (displacement ellipsoids are drawn at 10% the probability level)

**Table S5.** Crystal data and structure refinement for **1**

|                                   |                                                                                                           |
|-----------------------------------|-----------------------------------------------------------------------------------------------------------|
| Empirical formula                 | C <sub>20</sub> H <sub>26</sub> O <sub>4</sub>                                                            |
| Formula weight                    | 330.41                                                                                                    |
| Temperature                       | 173(2) K                                                                                                  |
| Wavelength                        | 1.54178 Å                                                                                                 |
| Crystal system, space group       | Monoclinic, Cc                                                                                            |
| Unit cell dimensions              | a = 75.889(6) Å      α = 90.00°<br>b = 15.6020(13) Å    β = 90.138(3)°<br>c = 9.0418(8) Å      γ = 90.00° |
| Volume                            | 10705.6(16) Å <sup>3</sup>                                                                                |
| Z                                 | 24                                                                                                        |
| Calculated density                | 1.230 Mg/cm <sup>3</sup>                                                                                  |
| Absorption coefficient            | 0.679 mm <sup>-1</sup>                                                                                    |
| F(000)                            | 4272                                                                                                      |
| Crystal size                      | 0.16 × 0.11 × 0.06 mm <sup>3</sup>                                                                        |
| Theta range for data collection   | 2.89 to 63.69°                                                                                            |
| Limiting indices                  | -87 ≤ h ≤ 68, -17 ≤ k ≤ 6, -9 ≤ l ≤ 9                                                                     |
| Reflections collected / unique    | 29890 / 13612 [R <sub>(int)</sub> = 0.1856]                                                               |
| Completeness to theta = 63.69°    | 94.4 %                                                                                                    |
| Refinement method                 | Full-matrix least-squares on F <sup>2</sup>                                                               |
| Data / restraints / parameters    | 13612 / 2 / 1329                                                                                          |
| Goodness-of-fit on F <sup>2</sup> | 2.162                                                                                                     |
| Final R indices [I > 2 sigma (I)] | R <sub>1</sub> = 0.3272, wR <sub>2</sub> = 0.6367                                                         |
| R indices (all data)              | R <sub>1</sub> = 0.4365, wR <sub>2</sub> = 0.6897                                                         |
| Absolute structure parameter      | 1.4(15)                                                                                                   |
| Extinction coefficient            | n/a                                                                                                       |
| Largest diff. peak and hole       | 2.102 and -1.640 e.Å <sup>-3</sup>                                                                        |

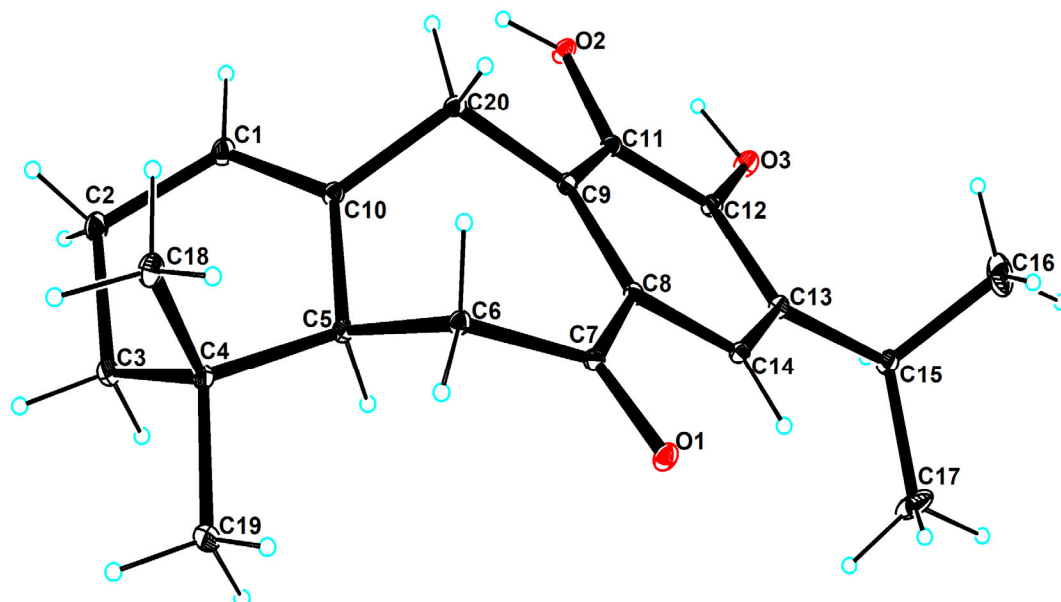

**Figure S7.** View of the molecule of **3** with the atom-labeling scheme (displacement ellipsoids are drawn at 10% the probability level)

**Table S6.** Crystal data and structure refinement for **3**

|                                   |                                                   |                |
|-----------------------------------|---------------------------------------------------|----------------|
| Empirical formula                 | C <sub>20</sub> H <sub>26</sub> O <sub>3</sub>    |                |
| Formula weight                    | 314.41                                            |                |
| Temperature                       | 100(10) K                                         |                |
| Wavelength                        | 1.54184 Å                                         |                |
| Crystal system, space group       | monoclinic, P2 <sub>1</sub>                       |                |
| Unit cell dimensions              | a = 7.58780(10) Å                                 | α = 90.00°     |
|                                   | b = 21.5262(3) Å                                  | β = 98.478(2)° |
|                                   | c = 10.3782(2) Å                                  | γ = 90.00°     |
| Volume                            | 1676.62(5) Å <sup>3</sup>                         |                |
| Z                                 | 4                                                 |                |
| Calculated density                | 1.246 Mg/cm <sup>3</sup>                          |                |
| Absorption coefficient            | 0.651 mm <sup>-1</sup>                            |                |
| F(000)                            | 680                                               |                |
| Crystal size                      | 0.2 × 0.15 × 0.1 mm <sup>3</sup>                  |                |
| Theta range for data collection   | 8.614 to 147.384°                                 |                |
| Limiting indices                  | -9 ≤ h ≤ 9, -26 ≤ k ≤ 26, -12 ≤ l ≤ 12            |                |
| Reflections collected / unique    | 12848 / 6367 [R <sub>(int)</sub> = 0.0244]        |                |
| Completeness to theta = 66.97°    | 99.81 %                                           |                |
| Refinement method                 | Full-matrix least-squares on F <sup>2</sup>       |                |
| Data / restraints / parameters    | 6367 / 16 / 457                                   |                |
| Goodness-of-fit on F <sup>2</sup> | 1.046                                             |                |
| Final R indices [I > 2 sigma (I)] | R <sub>1</sub> = 0.0349, wR <sub>2</sub> = 0.0895 |                |
| R indices (all data)              | R <sub>1</sub> = 0.0352, wR <sub>2</sub> = 0.0898 |                |
| Absolute structure parameter      | 0.01(7)                                           |                |
| Extinction coefficient            | n/a                                               |                |
| Largest diff. peak and hole       | 0.23 and -0.28 e.Å <sup>-3</sup>                  |                |

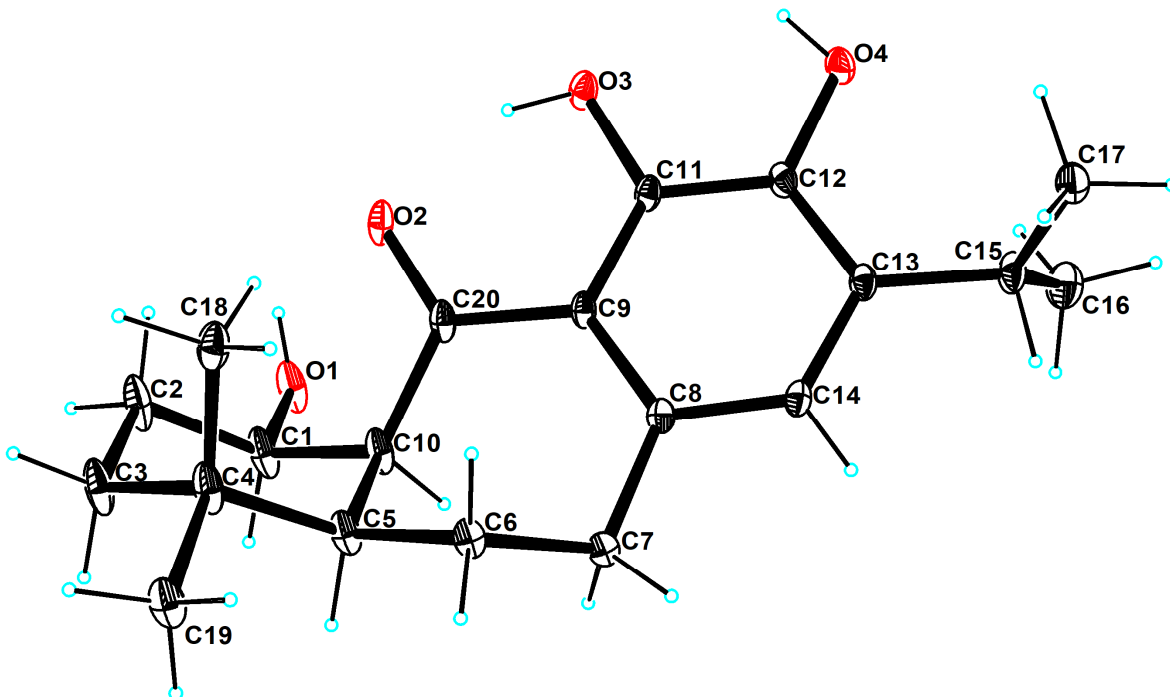

**Figure S8.** View of the molecule of **4** with the atom-labeling scheme (displacement ellipsoids are drawn at 10% the probability level)

**Table S7.** Crystal data and structure refinement for **4**

|                                   |                                                   |                   |
|-----------------------------------|---------------------------------------------------|-------------------|
| Empirical formula                 | C <sub>40</sub> H <sub>56</sub> O <sub>8</sub>    |                   |
| Formula weight                    | 663.84                                            |                   |
| Temperature                       | 293(2) K                                          |                   |
| Wavelength                        | 1.54178 Å                                         |                   |
| Crystal system, space group       | Monoclinic, C2                                    |                   |
| Unit cell dimensions              | a = 20.8185(6) Å                                  | α = 90.00°        |
|                                   | b = 16.8043(5) Å                                  | β = 124.7340(10)° |
|                                   | c = 12.9355(4) Å                                  | γ = 90.00°        |
| Volume                            | 3719.0(2) Å <sup>3</sup>                          |                   |
| Z                                 | 4                                                 |                   |
| Calculated density                | 1.186 Mg/cm <sup>3</sup>                          |                   |
| Absorption coefficient            | 0.652 mm <sup>-1</sup>                            |                   |
| F(000)                            | 1232                                              |                   |
| Crystal size                      | 0.05 × 0.04 × 0.03 mm <sup>3</sup>                |                   |
| Theta range for data collection   | 3.687 to 66.630°                                  |                   |
| Limiting indices                  | -24 ≤ h ≤ 24, -19 ≤ k ≤ 19, -15 ≤ l ≤ 15          |                   |
| Reflections collected / unique    | 20401 / 6495 [R <sub>(int)</sub> = 0.0250]        |                   |
| Completeness to theta = 66.63°    | 99.4 %                                            |                   |
| Refinement method                 | Full-matrix least-squares on F <sup>2</sup>       |                   |
| Data / restraints / parameters    | 6495 / 601 / 447                                  |                   |
| Goodness-of-fit on F <sup>2</sup> | 1.025                                             |                   |
| Final R indices [I > 2 sigma (I)] | R <sub>1</sub> = 0.0777, wR <sub>2</sub> = 0.2040 |                   |
| R indices (all data)              | R <sub>1</sub> = 0.0845, wR <sub>2</sub> = 0.2117 |                   |
| Absolute structure parameter      | 0.1(5)                                            |                   |
| Extinction coefficient            | n/a                                               |                   |
| Largest diff. peak and hole       | 0.545 and -0.310 e.Å <sup>-3</sup>                |                   |

**Table S8.** Important thermodynamic parameters (a.u.) and Boltzmann distributions of the optimized compound **1** at B3LYP/6-31G (d) level in methanol

| Conformations | Gibbs free energies (Hartree) | Boltzmann distribution |
|---------------|-------------------------------|------------------------|
| 1             | -1078.542743                  | 80.61%                 |
| 2             | -1078.540751                  | 9.80%                  |
| 3             | -1078.540725                  | 9.59%                  |

**Table S9.** Optimized coordinate of compound **1** at B3LYP/6-31G (d) level in methanol

| Conformation 1 |        |        |        |      |        |        |        |
|----------------|--------|--------|--------|------|--------|--------|--------|
| Atom           | X      | Y      | Z      | Atom | X      | Y      | Z      |
| C              | -3.121 | 1.1    | -0.241 | H    | -2.706 | 3.578  | -0.993 |
| C              | -1.843 | 1.682  | -0.375 | H    | 1.526  | -0.506 | -2.19  |
| C              | -0.719 | 0.894  | -0.08  | H    | 1.039  | 2.057  | 0.439  |
| C              | -3.316 | -0.222 | 0.168  | H    | 1.105  | 1.323  | -1.146 |
| C              | -0.907 | -0.414 | 0.318  | H    | 2.985  | 1.909  | 1.686  |
| C              | -2.172 | -0.995 | 0.454  | H    | 3.377  | 1.023  | 3.146  |
| C              | -1.733 | 3.075  | -0.809 | H    | 1.877  | -0.84  | 2.501  |
| C              | 2.1    | -1.254 | -1.607 | H    | 0.97   | 0.676  | 2.51   |
| C              | 0.765  | 1.158  | -0.119 | H    | 5.156  | 0.72   | 1.407  |
| C              | 3.103  | 0.897  | 2.092  | H    | 4.405  | -0.803 | 1.869  |
| C              | 1.775  | 0.132  | 2.001  | H    | 2.637  | -1.818 | 0.334  |
| C              | 4.22   | 0.15   | 1.353  | H    | 4.999  | 1.542  | -0.942 |
| C              | 2.506  | -0.866 | -0.197 | H    | 3.738  | 0.958  | -2.028 |
| C              | 1.37   | -0.126 | 0.545  | H    | 3.312  | 1.928  | -0.61  |
| C              | 3.913  | -0.152 | -0.136 | H    | 5.983  | -0.679 | -0.531 |
| C              | 3.979  | 1.142  | -0.975 | H    | 4.969  | -2.075 | -0.122 |
| C              | 4.989  | -1.122 | -0.664 | H    | 4.86   | -1.339 | -1.729 |
| C              | -5.823 | 0.139  | 0.559  | H    | -5.605 | 0.776  | 1.424  |
| C              | -5.007 | -1.731 | -0.943 | H    | -6.003 | 0.788  | -0.306 |
| C              | -4.692 | -0.866 | 0.296  | H    | -6.756 | -0.399 | 0.761  |
| O              | -0.683 | 3.686  | -0.976 | H    | -5.966 | -2.247 | -0.816 |
| O              | 2.38   | -2.323 | -2.115 | H    | -4.233 | -2.488 | -1.107 |
| O              | 0.246  | -1.102 | 0.571  | H    | -5.073 | -1.109 | -1.844 |
| O              | -2.304 | -2.288 | 0.858  | H    | -4.644 | -1.543 | 1.159  |
| H              | -3.985 | 1.719  | -0.462 | H    | -1.416 | -2.642 | 1.045  |
|                |        |        |        |      |        |        |        |
| Conformation 2 |        |        |        |      |        |        |        |
| Atom           | X      | Y      | Z      | Atom | X      | Y      | Z      |
| C              | 3.027  | 0.941  | 0.053  | H    | 0.655  | 3.455  | 0.099  |
| C              | 1.773  | 1.584  | 0.027  | H    | -2.95  | -1.505 | 2.511  |
| C              | 0.621  | 0.79   | -0.101 | H    | -1.116 | 1.844  | -0.897 |
| C              | 3.173  | -0.445 | -0.04  | H    | -1.192 | 1.489  | 0.832  |
| C              | 0.762  | -0.581 | -0.189 | H    | -3.527 | 0.264  | -3.259 |
| C              | 2.004  | -1.224 | -0.168 | H    | -3.109 | 1.463  | -2.052 |
| C              | 1.684  | 3.043  | 0.131  | H    | -2.055 | -1.421 | -2.204 |
| C              | -2.277 | -0.864 | 1.906  | H    | -1.121 | 0.03   | -2.574 |
| C              | -0.858 | 1.104  | -0.133 | H    | -5.293 | 0.406  | -1.488 |
| C              | -3.244 | 0.385  | -2.207 | H    | -4.567 | -1.195 | -1.58  |
| C              | -1.93  | -0.362 | -1.946 | H    | -2.803 | -1.839 | 0.144  |
| C              | -4.364 | -0.15  | -1.306 | H    | -5.071 | -0.774 | 2.043  |



|                |          |          |          |             |          |          |          |
|----------------|----------|----------|----------|-------------|----------|----------|----------|
| C              | -2.645   | -0.789   | 0.436    | H           | -6.131   | -0.497   | 0.661    |
| C              | -1.503   | -0.284   | -0.473   | H           | -5.115   | -1.947   | 0.711    |
| C              | -4.045   | -0.094   | 0.209    | H           | -3.403   | 2.024    | 0.151    |
| C              | -5.146   | -0.879   | 0.955    | H           | -5.085   | 1.768    | 0.615    |
| C              | -4.07    | 1.365    | 0.713    | H           | -3.791   | 1.432    | 1.771    |
| C              | 5.395    | -0.699   | -1.231   | H           | 6.356    | -1.228   | -1.222   |
| C              | 5.289    | -0.826   | 1.304    | H           | 4.885    | -0.939   | -2.171   |
| C              | 4.545    | -1.11    | -0.014   | H           | 5.605    | 0.377    | -1.227   |
| O              | 2.641    | 3.802    | 0.247    | H           | 6.248    | -1.356   | 1.322    |
| O              | -1.341   | -0.304   | 2.443    | H           | 4.702    | -1.154   | 2.17     |
| O              | -0.409   | -1.272   | -0.302   | H           | 5.497    | 0.244    | 1.425    |
| O              | 2.081    | -2.58    | -0.269   | H           | 4.385    | -2.191   | -0.074   |
| H              | 3.908    | 1.569    | 0.15     | H           | 1.176    | -2.928   | -0.364   |
|                |          |          |          |             |          |          |          |
| Conformation 3 |          |          |          |             |          |          |          |
| <b>Atom</b>    | <b>X</b> | <b>Y</b> | <b>Z</b> | <b>Atom</b> | <b>X</b> | <b>Y</b> | <b>Z</b> |
| C              | -3.221   | 0.807    | 0.049    | H           | -1.341   | 3.708    | 0.143    |
| C              | -2.1     | 1.663    | 0.083    | H           | 4.011    | 1.854    | 0.3      |
| C              | -0.822   | 1.084    | 0.093    | H           | 0.81     | 2.102    | -0.889   |
| C              | -3.113   | -0.584   | 0.02     | H           | 0.75     | 2.415    | 0.845    |
| C              | -0.709   | -0.293   | 0.061    | H           | 3.074    | -0.94    | 3.15     |
| C              | -1.815   | -1.144   | 0.029    | H           | 2.174    | -1.855   | 1.95     |
| C              | -2.28    | 3.118    | 0.11     | H           | 0.987    | 0.276    | 2.444    |
| C              | 3.42     | 1.621    | -0.609   | H           | 2.442    | 1.197    | 2.085    |
| C              | 0.579    | 1.649    | 0.082    | H           | 4.646    | -0.104   | 1.461    |
| C              | 2.765    | -0.944   | 2.098    | H           | 4.604    | -1.856   | 1.386    |
| C              | 1.89     | 0.285    | 1.821    | H           | 2.284    | 0.177    | -1.632   |
| C              | 4.005    | -0.956   | 1.194    | H           | 4.771    | -0.61    | -2.196   |
| C              | 2.684    | 0.288    | -0.618   | H           | 5.648    | -1.544   | -0.972   |
| C              | 1.468    | 0.389    | 0.349    | H           | 5.521    | 0.209    | -0.814   |
| C              | 3.673    | -0.9     | -0.319   | H           | 2.812    | -2.199   | -1.853   |
| C              | 4.976    | -0.691   | -1.122   | H           | 2.154    | -2.503   | -0.243   |
| C              | 3.062    | -2.238   | -0.786   | H           | 3.794    | -3.043   | -0.644   |
| C              | -4.545   | -2.006   | -1.492   | H           | -4.802   | -1.166   | -2.149   |
| C              | -5.602   | -0.907   | 0.532    | H           | -5.37    | -2.728   | -1.526   |
| C              | -4.316   | -1.516   | -0.045   | H           | -3.651   | -2.492   | -1.893   |
| O              | -3.362   | 3.693    | 0.099    | H           | -5.969   | -0.074   | -0.079   |
| O              | 3.378    | 2.42     | -1.525   | H           | -5.452   | -0.539   | 1.553    |
| O              | 0.578    | -0.759   | 0.064    | H           | -6.392   | -1.665   | 0.557    |
| O              | -1.66    | -2.496   | 0.007    | H           | -4.067   | -2.398   | 0.559    |
| H              | -4.2     | 1.273    | 0.05     | H           | -0.709   | -2.699   | 0.057    |

**Table S10.** Important thermodynamic parameters (a.u.) and Boltzmann distributions of the optimized compound *ent-1* at B3LYP/6-31G (d) level in methanol

| Conformations | Gibbs free energies (Hartree) | Boltzmann distribution |
|---------------|-------------------------------|------------------------|
| 1             | -1078.54                      | 84.73%                 |
| 2             | -1078.54                      | 9.87%                  |
| 3             | -1078.54                      | 5.40%                  |

**Table S11.** Optimized coordinate of compound *ent-1* at B3LYP/6-31G (d) level in the methanol

| Conformation 1 |        |        |        |      |        |        |        |
|----------------|--------|--------|--------|------|--------|--------|--------|
| Atom           | X      | Y      | Z      | Atom | X      | Y      | Z      |
| C              | -3.12  | 1.026  | 0.283  | H    | -2.737 | 3.546  | 0.907  |
| C              | -1.854 | 1.638  | 0.358  | H    | 1.574  | -0.398 | 2.215  |
| C              | -0.722 | 0.855  | 0.073  | H    | 1.007  | 2.019  | -0.539 |
| C              | -3.3   | -0.32  | -0.055 | H    | 1.113  | 1.37   | 1.08   |
| C              | -0.895 | -0.472 | -0.258 | H    | 3.339  | 0.891  | -3.21  |
| C              | -2.152 | -1.086 | -0.335 | H    | 2.946  | 1.841  | -1.792 |
| C              | -1.76  | 3.052  | 0.724  | H    | 0.944  | 0.538  | -2.536 |
| C              | 2.141  | -1.172 | 1.659  | H    | 1.874  | -0.961 | -2.462 |
| C              | 0.758  | 1.146  | 0.07   | H    | 4.41   | -0.853 | -1.857 |
| C              | 3.076  | 0.812  | -2.149 | H    | 5.138  | 0.703  | -1.475 |
| C              | 1.762  | 0.032  | -2.009 | H    | 2.668  | -1.822 | -0.257 |
| C              | 4.212  | 0.12   | -1.386 | H    | 3.744  | 1.08   | 1.958  |
| C              | 2.528  | -0.847 | 0.228  | H    | 3.295  | 1.975  | 0.499  |
| C              | 1.373  | -0.161 | -0.538 | H    | 4.99   | 1.63   | 0.835  |
| C              | 3.923  | -0.116 | 0.119  | H    | 4.903  | -1.211 | 1.758  |
| C              | 3.976  | 1.218  | 0.895  | H    | 6.005  | -0.592 | 0.518  |
| C              | 5.019  | -1.043 | 0.682  | H    | 5.008  | -2.021 | 0.186  |
| C              | -5.559 | -0.28  | -1.207 | H    | -5.746 | 0.775  | -0.974 |
| C              | -5.389 | -0.93  | 1.245  | H    | -6.53  | -0.784 | -1.277 |
| C              | -4.687 | -0.949 | -0.126 | H    | -5.078 | -0.328 | -2.19  |
| O              | -0.718 | 3.687  | 0.836  | H    | -5.568 | 0.095  | 1.589  |
| O              | 2.432  | -2.215 | 2.212  | H    | -4.787 | -1.44  | 2.005  |
| O              | 0.264  | -1.153 | -0.505 | H    | -6.36  | -1.436 | 1.183  |
| O              | -2.258 | -2.4   | -0.674 | H    | -4.554 | -1.997 | -0.413 |
| H              | -3.995 | 1.634  | 0.501  | H    | -1.363 | -2.742 | -0.847 |
|                |        |        |        |      |        |        |        |
| Conformation 2 |        |        |        |      |        |        |        |
| Atom           | X      | Y      | Z      | Atom | X      | Y      | Z      |
| C              | 3.221  | 0.807  | 0.049  | H    | 1.341  | 3.708  | 0.143  |
| C              | 2.1    | 1.663  | 0.083  | H    | -4.011 | 1.854  | 0.299  |
| C              | 0.822  | 1.084  | 0.093  | H    | -0.751 | 2.415  | 0.845  |
| C              | 3.113  | -0.583 | 0.02   | H    | -0.81  | 2.102  | -0.889 |
| C              | 0.709  | -0.293 | 0.061  | H    | -2.174 | -1.855 | 1.95   |
| C              | 1.815  | -1.144 | 0.029  | H    | -3.074 | -0.94  | 3.15   |
| C              | 2.28   | 3.118  | 0.11   | H    | -2.442 | 1.197  | 2.085  |
| C              | -3.42  | 1.621  | -0.609 | H    | -0.987 | 0.276  | 2.444  |
| C              | -0.579 | 1.649  | 0.082  | H    | -4.604 | -1.856 | 1.386  |
| C              | -2.765 | -0.944 | 2.098  | H    | -4.646 | -0.104 | 1.461  |
| C              | -1.89  | 0.285  | 1.821  | H    | -2.283 | 0.177  | -1.632 |
| C              | -4.005 | -0.956 | 1.194  | H    | -4.771 | -0.61  | -2.196 |
| C              | -2.684 | 0.288  | -0.618 | H    | -5.521 | 0.209  | -0.814 |
| C              | -1.468 | 0.389  | 0.349  | H    | -5.648 | -1.544 | -0.972 |
| C              | -3.673 | -0.9   | -0.319 | H    | -2.812 | -2.199 | -1.853 |
| C              | -4.976 | -0.691 | -1.122 | H    | -3.794 | -3.043 | -0.644 |
| C              | -3.062 | -2.239 | -0.786 | H    | -2.154 | -2.503 | -0.242 |
| C              | 5.602  | -0.907 | 0.532  | H    | 5.969  | -0.074 | -0.079 |
| C              | 4.545  | -2.007 | -1.491 | H    | 6.392  | -1.665 | 0.557  |
| C              | 4.316  | -1.516 | -0.045 | H    | 5.452  | -0.538 | 1.553  |
| O              | 3.361  | 3.693  | 0.099  | H    | 4.802  | -1.167 | -2.149 |

| O              | -3.377 | 2.42   | -1.525 | H    | 3.65   | -2.493 | -1.892 |
|----------------|--------|--------|--------|------|--------|--------|--------|
| O              | -0.578 | -0.759 | 0.064  | H    | 5.37   | -2.729 | -1.525 |
| O              | 1.66   | -2.496 | 0.007  | H    | 4.068  | -2.398 | 0.559  |
| H              | 4.2    | 1.274  | 0.05   | H    | 0.709  | -2.698 | 0.058  |
| Conformation 3 |        |        |        |      |        |        |        |
| Atom           | X      | Y      | Z      | Atom | X      | Y      | Z      |
| C              | -2.994 | 1.257  | 0.075  | H    | -0.459 | 3.609  | 0.105  |
| C              | -1.699 | 1.816  | 0.043  | H    | 2.828  | -1.58  | 2.507  |
| C              | -0.606 | 0.945  | -0.086 | H    | 1.194  | 1.877  | -0.891 |
| C              | -3.24  | -0.115 | -0.014 | H    | 1.255  | 1.518  | 0.838  |
| C              | -0.843 | -0.413 | -0.17  | H    | 3.47   | 0.137  | -3.271 |
| C              | -2.123 | -0.972 | -0.144 | H    | 3.14   | 1.362  | -2.064 |
| C              | -1.513 | 3.266  | 0.143  | H    | 1.058  | 0.063  | -2.568 |
| C              | 2.187  | -0.904 | 1.904  | H    | 1.898  | -1.446 | -2.202 |
| C              | 0.89   | 1.156  | -0.125 | H    | 4.425  | -1.384 | -1.598 |
| C              | 3.204  | 0.277  | -2.217 | H    | 5.255  | 0.166  | -1.513 |
| C              | 1.845  | -0.38  | -1.945 | H    | 2.635  | -1.911 | 0.138  |
| C              | 4.293  | -0.328 | -1.324 | H    | 3.849  | 1.288  | 1.757  |
| C              | 2.549  | -0.853 | 0.431  | H    | 3.486  | 1.905  | 0.14   |
| C              | 1.436  | -0.272 | -0.469 | H    | 5.151  | 1.539  | 0.589  |
| C              | 3.99   | -0.25  | 0.193  | H    | 4.987  | -0.992 | 2.02   |
| C              | 4.113  | 1.204  | 0.697  | H    | 6.048  | -0.792 | 0.626  |
| C              | 5.043  | -1.105 | 0.932  | H    | 4.938  | -2.17  | 0.693  |
| C              | -4.935 | -1.538 | 1.25   | H    | -4.341 | -2.456 | 1.207  |
| C              | -5.08  | -1.339 | -1.286 | H    | -5.994 | -1.819 | 1.288  |
| C              | -4.671 | -0.639 | 0.026  | H    | -4.69  | -1.015 | 2.181  |
| O              | -2.417 | 4.087  | 0.262  | H    | -4.492 | -2.245 | -1.454 |
| O              | 1.284  | -0.294 | 2.445  | H    | -4.939 | -0.675 | -2.146 |
| O              | 0.278  | -1.182 | -0.288 | H    | -6.139 | -1.621 | -1.247 |
| O              | -2.282 | -2.322 | -0.241 | H    | -5.312 | 0.245  | 0.132  |
| H              | -3.833 | 1.94   | 0.172  | H    | -1.4   | -2.723 | -0.342 |

**Table S12.** Important thermodynamic parameters (a.u.) and Boltzmann distributions of the optimized compound **2** at B3LYP/6-31G (d) level in methanol

| Conformations | Gibbs free energies (Hartree) | Boltzmann distribution |
|---------------|-------------------------------|------------------------|
| 1             | -1078.54                      | 92.92%                 |
| 2             | -1078.54                      | 4.31%                  |
| 3             | -1078.54                      | 1.46%                  |
| 4             | -1078.54                      | 1.31%                  |

**Table S13.** Optimized coordinate of compound **2** at B3LYP/6-31G (d) level in the methanol

| Conformation 1 |        |        |        |      |        |        |        |
|----------------|--------|--------|--------|------|--------|--------|--------|
| Atom           | X      | Y      | Z      | Atom | X      | Y      | Z      |
| C              | -3.227 | 1.096  | 0.038  | H    | -3.285 | 3.72   | -0.071 |
| C              | -2.086 | 1.908  | -0.117 | H    | 1.299  | -0.166 | 2.11   |
| C              | -0.836 | 1.276  | -0.224 | H    | 0.677  | 2.46   | -1.24  |
| C              | -3.179 | -0.301 | 0.09   | H    | 0.886  | 2.369  | 0.497  |
| C              | -0.781 | -0.102 | -0.169 | H    | 2.126  | -1.828 | -2.067 |

|                |          |          |          |             |          |          |          |
|----------------|----------|----------|----------|-------------|----------|----------|----------|
| C              | -1.912   | -0.913   | -0.02    | H           | 3.038    | -0.968   | -3.298   |
| C              | -2.237   | 3.362    | -0.159   | H           | 2.417    | 1.215    | -2.316   |
| C              | 2.158    | 0.48     | 1.843    | H           | 0.952    | 0.297    | -2.661   |
| C              | 0.57     | 1.792    | -0.38    | H           | 4.573    | -1.772   | -1.499   |
| C              | 2.718    | -0.925   | -2.251   | H           | 4.558    | -0.015   | -1.603   |
| C              | 1.851    | 0.318    | -2.031   | H           | 3.206    | 1.32     | 0.22     |
| C              | 3.945    | -0.887   | -1.334   | H           | 4.739    | -0.478   | 2.032    |
| C              | 2.619    | 0.41     | 0.399    | H           | 5.371    | 0.41     | 0.635    |
| C              | 1.413    | 0.486    | -0.572   | H           | 5.627    | -1.339   | 0.766    |
| C              | 3.604    | -0.805   | 0.175    | H           | 2.832    | -2.137   | 1.746    |
| C              | 4.908    | -0.533   | 0.952    | H           | 3.743    | -2.95    | 0.472    |
| C              | 3.02     | -2.149   | 0.666    | H           | 2.083    | -2.408   | 0.168    |
| C              | -4.485   | -1.92    | 1.565    | H           | -3.712   | -2.694   | 1.564    |
| C              | -4.764   | -1.993   | -0.967   | H           | -5.458   | -2.41    | 1.686    |
| C              | -4.463   | -1.105   | 0.256    | H           | -4.32    | -1.273   | 2.434    |
| O              | -1.32    | 4.167    | -0.279   | H           | -4.002   | -2.769   | -1.094   |
| O              | 2.683    | 1.179    | 2.69     | H           | -4.801   | -1.397   | -1.886   |
| O              | 0.479    | -0.627   | -0.261   | H           | -5.735   | -2.487   | -0.844   |
| O              | -1.782   | -2.268   | 0.018    | H           | -5.273   | -0.367   | 0.324    |
| H              | -4.197   | 1.582    | 0.12     | H           | -0.84    | -2.488   | -0.094   |
|                |          |          |          |             |          |          |          |
| Conformation 2 |          |          |          |             |          |          |          |
| <b>Atom</b>    | <b>X</b> | <b>Y</b> | <b>Z</b> | <b>Atom</b> | <b>X</b> | <b>Y</b> | <b>Z</b> |
| C              | 3.155    | 0.917    | -0.193   | H           | 0.924    | 3.54     | -0.503   |
| C              | 1.937    | 1.624    | -0.251   | H           | -2.916   | -2.385   | 0.584    |
| C              | 0.743    | 0.902    | -0.088   | H           | -0.959   | 2.134    | 0.52     |
| C              | 3.225    | -0.462   | 0.017    | H           | -1.019   | 1.563    | -1.147   |
| C              | 0.809    | -0.461   | 0.119    | H           | -3.427   | 0.849    | 3.089    |
| C              | 2.014    | -1.168   | 0.181    | H           | -2.971   | 1.936    | 1.793    |
| C              | 1.929    | 3.073    | -0.477   | H           | -1.034   | 0.483    | 2.408    |
| C              | -2.763   | -1.992   | -0.442   | H           | -2.02    | -0.957   | 2.195    |
| C              | -0.719   | 1.287    | -0.13    | H           | -4.541   | -0.688   | 1.531    |
| C              | -3.148   | 0.879    | 2.03     | H           | -5.197   | 0.927    | 1.314    |
| C              | -1.863   | 0.064    | 1.826    | H           | -2.294   | -0.324   | -1.618   |
| C              | -4.292   | 0.322    | 1.174    | H           | -3.653   | 1.665    | -1.994   |
| C              | -2.596   | -0.485   | -0.577   | H           | -3.163   | 2.33     | -0.429   |
| C              | -1.443   | -0.014   | 0.35     | H           | -4.875   | 2.177    | -0.819   |
| C              | -3.966   | 0.265    | -0.339   | H           | -4.871   | -0.594   | -2.144   |
| C              | -3.898   | 1.692    | -0.926   | H           | -6.033   | 0.089    | -0.991   |
| C              | -5.099   | -0.479   | -1.077   | H           | -5.281   | -1.476   | -0.663   |
| C              | 5.429    | -0.702   | 1.247    | H           | 5.703    | 0.353    | 1.125    |
| C              | 5.319    | -1.093   | -1.262   | H           | 6.357    | -1.283   | 1.304    |
| C              | 4.56     | -1.196   | 0.075    | H           | 4.903    | -0.805   | 2.202    |
| O              | 2.928    | 3.766    | -0.632   | H           | 5.582    | -0.054   | -1.493   |
| O              | -2.755   | -2.753   | -1.389   | H           | 4.718    | -1.481   | -2.091   |
| O              | -0.405   | -1.073   | 0.263    | H           | 6.25     | -1.671   | -1.217   |
| O              | 2.02     | -2.513   | 0.393    | H           | 4.344    | -2.254   | 0.249    |
| H              | 4.069    | 1.488    | -0.319   | H           | 1.098    | -2.81    | 0.496    |
|                |          |          |          |             |          |          |          |
| Conformation 3 |          |          |          |             |          |          |          |
| <b>Atom</b>    | <b>X</b> | <b>Y</b> | <b>Z</b> | <b>Atom</b> | <b>X</b> | <b>Y</b> | <b>Z</b> |
| C              | -3.182   | 0.768    | 0.013    | H           | -1.45    | 3.662    | -0.74    |
| C              | -2.108   | 1.636    | -0.264   | H           | 1.609    | 0.243    | 2.161    |

|                |          |          |          |             |          |          |          |
|----------------|----------|----------|----------|-------------|----------|----------|----------|
| C              | -0.81    | 1.105    | -0.277   | H           | 0.62     | 2.312    | -1.415   |
| C              | -3.005   | -0.59    | 0.278    | H           | 0.824    | 2.392    | 0.331    |
| C              | -0.623   | -0.242   | -0.014   | H           | 2.998    | -1.255   | -3.203   |
| C              | -1.687   | -1.108   | 0.263    | H           | 2.238    | -1.976   | -1.791   |
| C              | -2.355   | 3.058    | -0.526   | H           | 0.892    | -0.026   | -2.578   |
| C              | 2.417    | 0.875    | 1.742    | H           | 2.314    | 1.012    | -2.476   |
| C              | 0.552    | 1.723    | -0.495   | H           | 4.712    | -1.709   | -1.441   |
| C              | 2.756    | -1.079   | -2.148   | H           | 4.578    | 0.01     | -1.794   |
| C              | 1.829    | 0.133    | -2.03    | H           | 3.274    | 1.528    | -0.07    |
| C              | 4.044    | -0.843   | -1.351   | H           | 5.067    | 0.11     | 1.837    |
| C              | 2.769    | 0.621    | 0.287    | H           | 5.91     | -0.882   | 0.638    |
| C              | 1.489    | 0.473    | -0.573   | H           | 5.527    | 0.81     | 0.275    |
| C              | 3.815    | -0.556   | 0.154    | H           | 2.406    | -2.218   | 0.522    |
| C              | 5.155    | -0.097   | 0.765    | H           | 4.12     | -2.622   | 0.743    |
| C              | 3.364    | -1.84    | 0.884    | H           | 3.269    | -1.674   | 1.964    |
| C              | -5.433   | -0.832   | 1.073    | H           | -6.183   | -1.58    | 1.349    |
| C              | -4.515   | -2.347   | -0.736   | H           | -5.209   | -0.229   | 1.959    |
| C              | -4.178   | -1.534   | 0.534    | H           | -5.885   | -0.178   | 0.318    |
| O              | -3.458   | 3.592    | -0.523   | H           | -5.309   | -3.073   | -0.527   |
| O              | 2.973    | 1.701    | 2.441    | H           | -3.645   | -2.894   | -1.115   |
| O              | 0.684    | -0.642   | -0.034   | H           | -4.862   | -1.679   | -1.532   |
| O              | -1.368   | -2.411   | 0.495    | H           | -3.874   | -2.245   | 1.319    |
| H              | -4.178   | 1.196    | 0.018    | H           | -2.165   | -2.909   | 0.738    |
|                |          |          |          |             |          |          |          |
| Conformation 4 |          |          |          |             |          |          |          |
| <b>Atom</b>    | <b>X</b> | <b>Y</b> | <b>Z</b> | <b>Atom</b> | <b>X</b> | <b>Y</b> | <b>Z</b> |
| C              | 3.202    | 1.048    | -0.103   | H           | 2.922    | 3.654    | -0.185   |
| C              | 1.959    | 1.709    | -0.089   | H           | -2.604   | -2.435   | -1.851   |
| C              | 0.793    | 0.926    | -0.022   | H           | -0.935   | 2.007    | 0.735    |
| C              | 3.327    | -0.345   | -0.058   | H           | -0.977   | 1.678    | -0.99    |
| C              | 0.912    | -0.446   | 0.019    | H           | -3.465   | 0.318    | 3.011    |
| C              | 2.146    | -1.109   | 0.008    | H           | -2.996   | 1.584    | 1.895    |
| C              | 1.923    | 3.17     | -0.147   | H           | -1.034   | 0.124    | 2.384    |
| C              | -2.637   | -2.015   | -0.825   | H           | -1.968   | -1.31    | 1.932    |
| C              | -0.677   | 1.262    | -0.022   | H           | -4.462   | -1.023   | 1.207    |
| C              | -3.146   | 0.5      | 1.978    | H           | -5.172   | 0.589    | 1.196    |
| C              | -1.828   | -0.245   | 1.722    | H           | -2.128   | -0.188   | -1.747   |
| C              | -4.243   | 0.034    | 1.01     | H           | -3.501   | 1.819    | -1.91    |
| C              | -2.468   | -0.497   | -0.75    | H           | -3.123   | 2.276    | -0.242   |
| C              | -1.361   | -0.117   | 0.267    | H           | -4.803   | 2.134    | -0.754   |
| C              | -3.862   | 0.198    | -0.481   | H           | -4.691   | -0.389   | -2.428   |
| C              | -3.806   | 1.693    | -0.864   | H           | -5.903   | 0.064    | -1.22    |
| C              | -4.948   | -0.454   | -1.364   | H           | -5.109   | -1.509   | -1.115   |
| C              | 5.523    | -0.662   | 1.169    | H           | 5.75     | 0.411    | 1.198    |
| C              | 5.464    | -0.722   | -1.371   | H           | 6.476    | -1.204   | 1.164    |
| C              | 4.691    | -1.028   | -0.074   | H           | 4.991    | -0.917   | 2.092    |
| O              | 0.907    | 3.856    | -0.158   | H           | 5.689    | 0.348    | -1.461   |
| O              | -2.822   | -2.755   | 0.122    | H           | 4.889    | -1.02    | -2.255   |
| O              | -0.274   | -1.119   | 0.075    | H           | 6.416    | -1.265   | -1.384   |
| O              | 2.197    | -2.468   | 0.059    | H           | 4.514    | -2.108   | -0.045   |
| H              | 4.103    | 1.654    | -0.153   | H           | 1.285    | -2.804   | 0.124    |

**Table S14.** Important thermodynamic parameters (a.u.) and Boltzmann distributions of the optimized compound *ent-2* at B3LYP/6-31G (d) level in methanol

| Conformations | Gibbs free energies (Hartree) | Boltzmann distribution |
|---------------|-------------------------------|------------------------|
| 1             | -1078.54                      | 73.18%                 |
| 2             | -1078.54                      | 26.76%                 |

**Table S15.** Optimized coordinate of compound *ent-2* at B3LYP/6-31G (d) level in the methanol

| Conformation 1 |        |        |        |      |        |        |        |
|----------------|--------|--------|--------|------|--------|--------|--------|
| Atom           | X      | Y      | Z      | Atom | X      | Y      | Z      |
| C              | -3.138 | 1.379  | -0.272 | H    | -2.663 | 3.933  | -0.651 |
| C              | -1.849 | 1.949  | -0.298 | H    | 2.491  | -2.579 | 0.574  |
| C              | -0.749 | 1.099  | -0.103 | H    | 1.097  | 1.605  | -1.089 |
| C              | -3.375 | 0.015  | -0.068 | H    | 1.035  | 2.134  | 0.586  |
| C              | -0.975 | -0.247 | 0.096  | H    | 3.047  | 1.685  | 1.846  |
| C              | -2.252 | -0.818 | 0.126  | H    | 3.373  | 0.534  | 3.126  |
| C              | -1.704 | 3.387  | -0.523 | H    | 1.773  | -1.086 | 2.201  |
| C              | 2.399  | -2.157 | -0.447 | H    | 0.955  | 0.454  | 2.436  |
| C              | 0.741  | 1.327  | -0.091 | H    | 5.145  | 0.436  | 1.353  |
| C              | 3.102  | 0.612  | 2.067  | H    | 4.308  | -1.095 | 1.543  |
| C              | 1.733  | -0.048 | 1.849  | H    | 2.125  | -0.43  | -1.601 |
| C              | 4.177  | -0.059 | 1.203  | H    | 4.66   | -0.969 | -2.132 |
| C              | 2.404  | -0.64  | -0.561 | H    | 4.957  | -1.927 | -0.672 |
| C              | 1.311  | -0.054 | 0.372  | H    | 5.886  | -0.452 | -0.961 |
| C              | 3.85   | -0.053 | -0.311 | H    | 3.699  | 1.402  | -1.94  |
| C              | 4.894  | -0.905 | -1.063 | H    | 4.97   | 1.753  | -0.759 |
| C              | 3.944  | 1.383  | -0.872 | H    | 3.285  | 2.092  | -0.365 |
| C              | -5.2   | -1.094 | 1.321  | H    | -4.605 | -1.978 | 1.572  |
| C              | -5.068 | -1.529 | -1.186 | H    | -6.257 | -1.386 | 1.315  |
| C              | -4.802 | -0.519 | -0.052 | H    | -5.059 | -0.351 | 2.114  |
| O              | -0.639 | 3.993  | -0.577 | H    | -4.473 | -2.438 | -1.057 |
| O              | 2.317  | -2.901 | -1.405 | H    | -4.825 | -1.097 | -2.163 |
| O              | 0.157  | -0.99  | 0.272  | H    | -6.127 | -1.814 | -1.195 |
| O              | -2.398 | -2.156 | 0.336  | H    | -5.449 | 0.348  | -0.237 |
| H              | -3.993 | 2.034  | -0.42  | H    | -1.513 | -2.543 | 0.462  |
|                |        |        |        |      |        |        |        |
| Conformation 2 |        |        |        |      |        |        |        |
| Atom           | X      | Y      | Z      | Atom | X      | Y      | Z      |
| C              | -3.155 | 0.917  | -0.193 | H    | -0.924 | 3.54   | -0.504 |
| C              | -1.937 | 1.624  | -0.251 | H    | 2.916  | -2.385 | 0.584  |
| C              | -0.743 | 0.902  | -0.088 | H    | 0.959  | 2.134  | 0.52   |
| C              | -3.225 | -0.462 | 0.017  | H    | 1.019  | 1.563  | -1.147 |
| C              | -0.809 | -0.462 | 0.119  | H    | 3.427  | 0.849  | 3.089  |
| C              | -2.014 | -1.168 | 0.181  | H    | 2.971  | 1.936  | 1.793  |
| C              | -1.929 | 3.073  | -0.477 | H    | 2.02   | -0.957 | 2.194  |
| C              | 2.763  | -1.992 | -0.442 | H    | 1.034  | 0.483  | 2.408  |
| C              | 0.719  | 1.287  | -0.13  | H    | 5.197  | 0.927  | 1.314  |
| C              | 3.147  | 0.879  | 2.03   | H    | 4.541  | -0.688 | 1.531  |
| C              | 1.863  | 0.064  | 1.826  | H    | 2.294  | -0.324 | -1.618 |
| C              | 4.292  | 0.322  | 1.174  | H    | 4.872  | -0.594 | -2.144 |
| C              | 2.596  | -0.485 | -0.577 | H    | 6.033  | 0.089  | -0.991 |

|   |        |        |        |   |        |        |        |
|---|--------|--------|--------|---|--------|--------|--------|
| C | 1.443  | -0.014 | 0.35   | H | 5.281  | -1.476 | -0.663 |
| C | 3.966  | 0.265  | -0.339 | H | 3.163  | 2.33   | -0.429 |
| C | 5.099  | -0.478 | -1.077 | H | 4.875  | 2.178  | -0.819 |
| C | 3.898  | 1.692  | -0.925 | H | 3.653  | 1.665  | -1.994 |
| C | -5.429 | -0.702 | 1.247  | H | -6.357 | -1.283 | 1.304  |
| C | -5.319 | -1.093 | -1.262 | H | -4.903 | -0.805 | 2.202  |
| C | -4.56  | -1.196 | 0.075  | H | -5.703 | 0.353  | 1.125  |
| O | -2.928 | 3.766  | -0.632 | H | -6.25  | -1.671 | -1.217 |
| O | 2.755  | -2.753 | -1.389 | H | -4.718 | -1.481 | -2.091 |
| O | 0.405  | -1.073 | 0.263  | H | -5.582 | -0.054 | -1.493 |
| O | -2.02  | -2.513 | 0.393  | H | -4.344 | -2.254 | 0.25   |
| H | -4.069 | 1.489  | -0.318 | H | -1.098 | -2.81  | 0.496  |

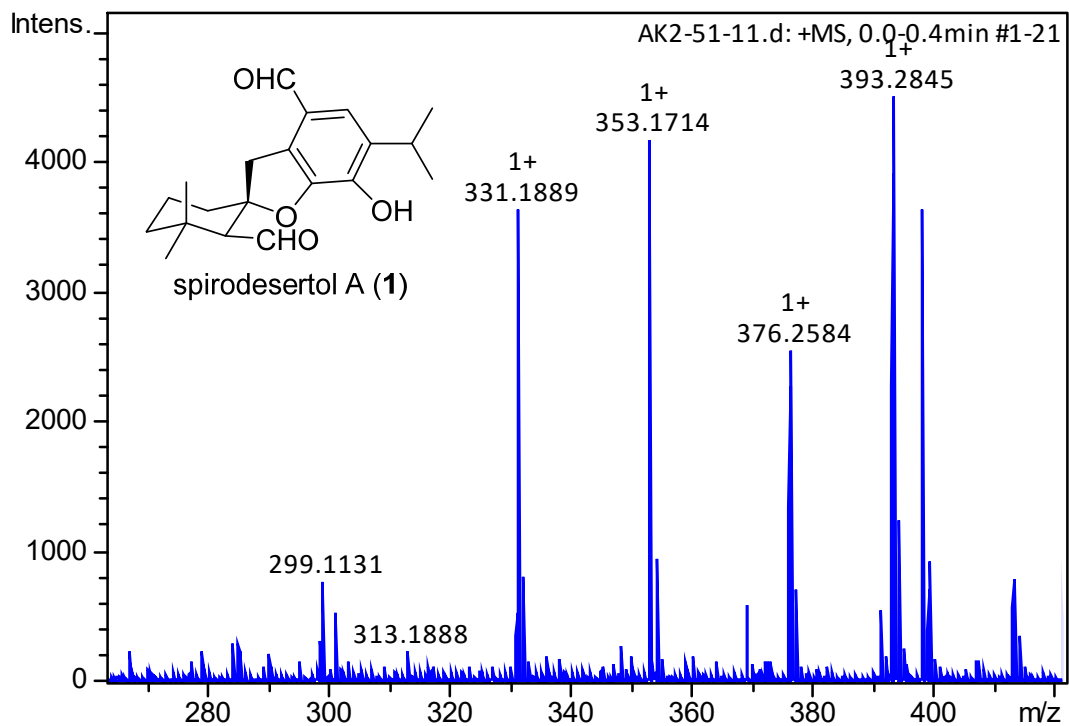

**Figure S9.** The HRESIMS spectrum of compound **1**

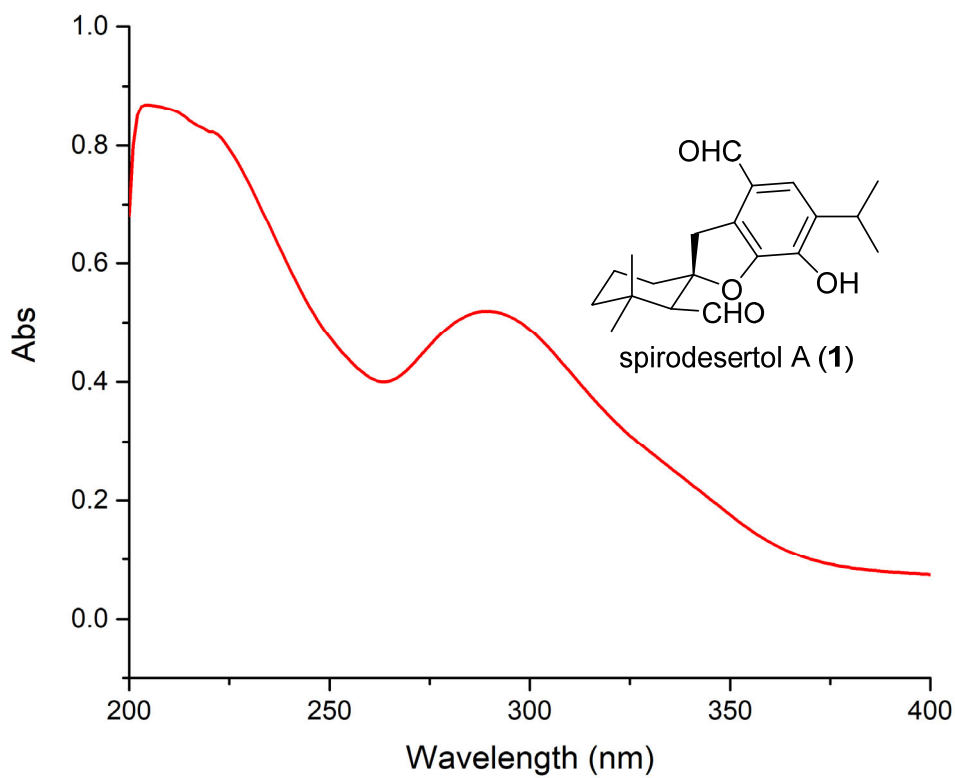

**Figure S10.** The UV spectrum of compound **1**



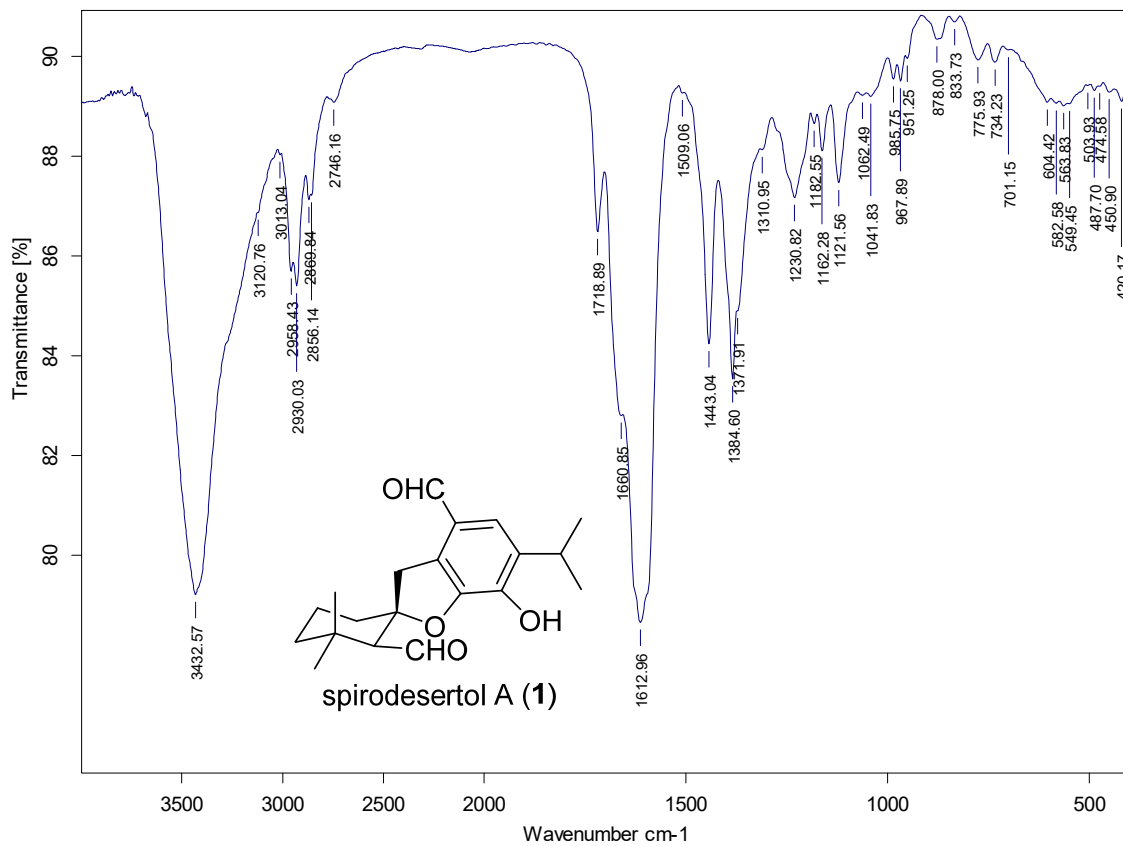

Figure S11. The IR spectrum of compound 1

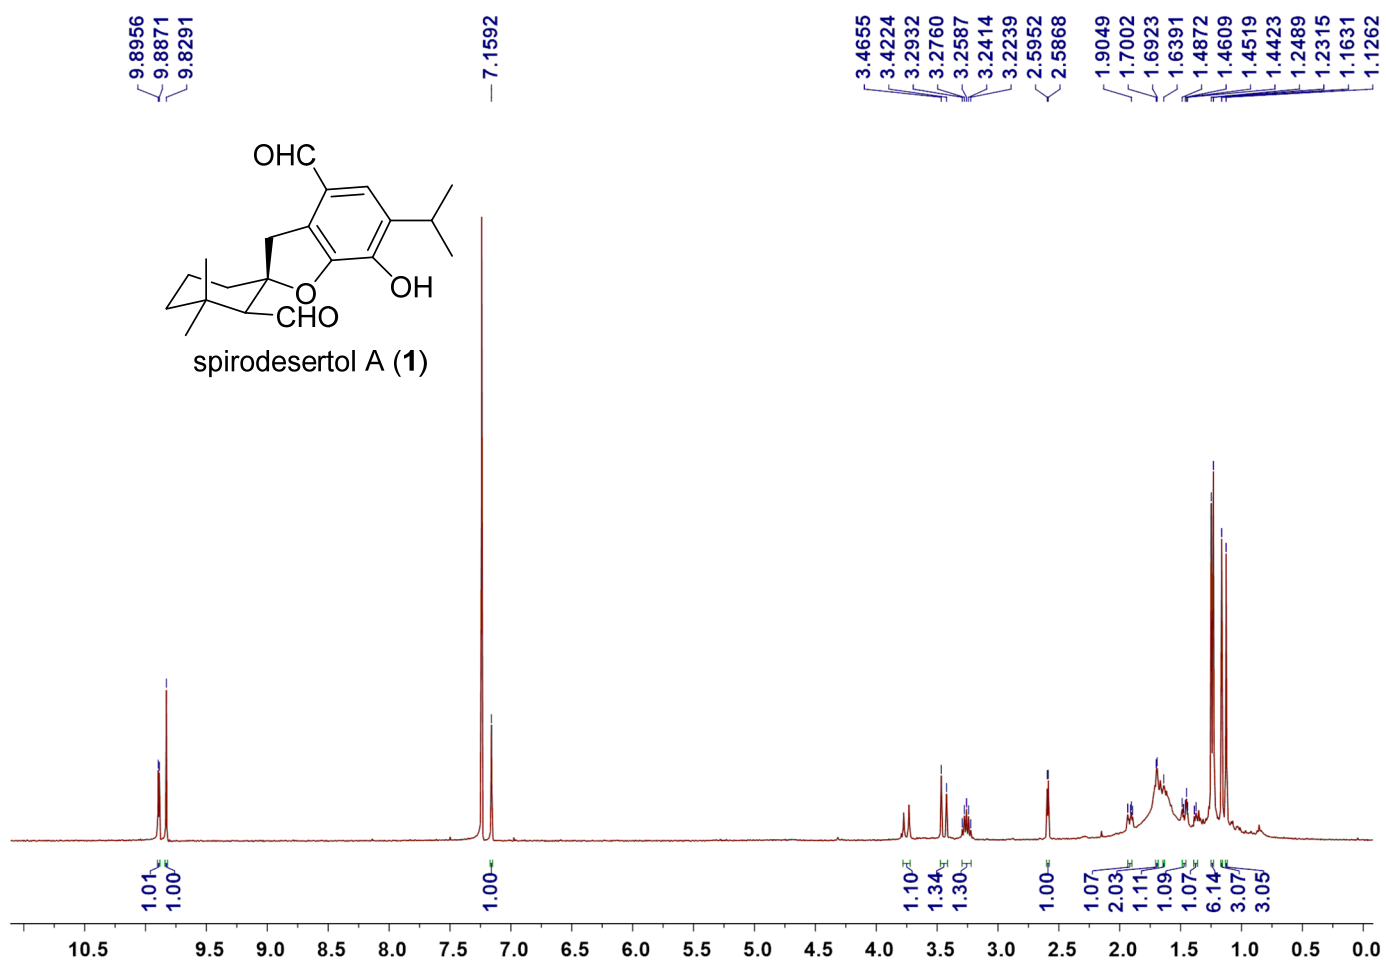

Figure S12. <sup>1</sup>H NMR spectrum of compound 1 (400 MHz, chloroform-d)

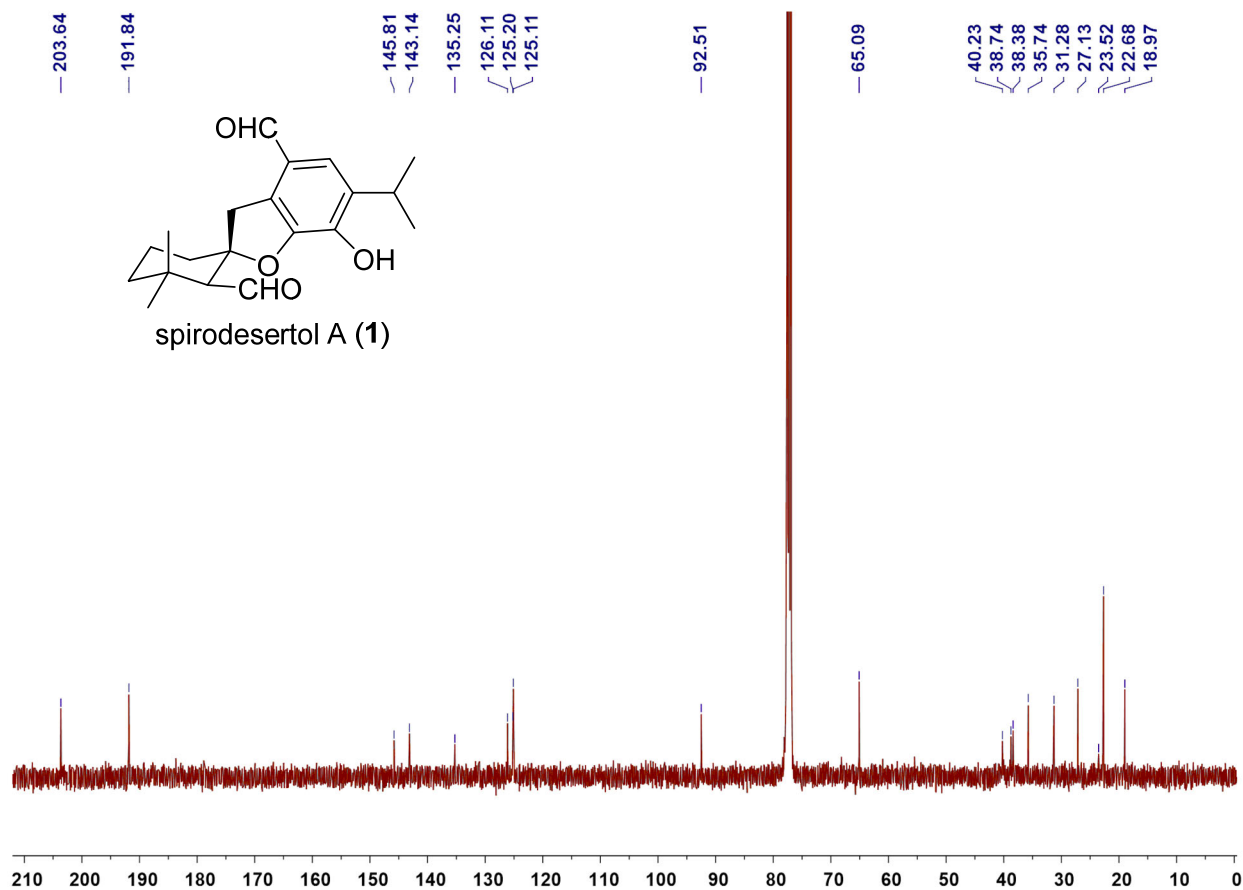

**Figure S13.** <sup>13</sup>C NMR spectrum of compound 1 (100 MHz, chloroform-*d*)

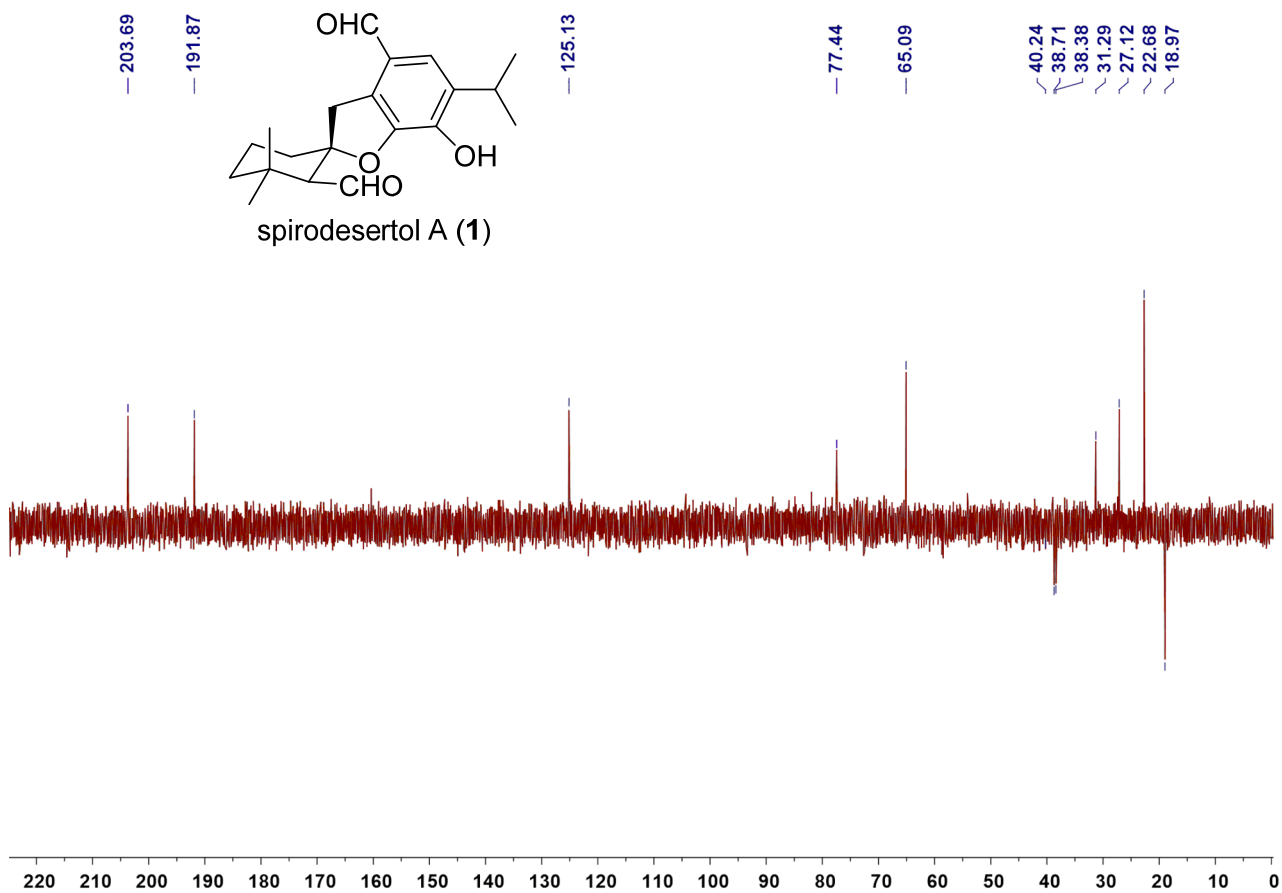

**Figure S14.** DEPT-135 spectrum of compound 1 (100 MHz, chloroform-*d*)

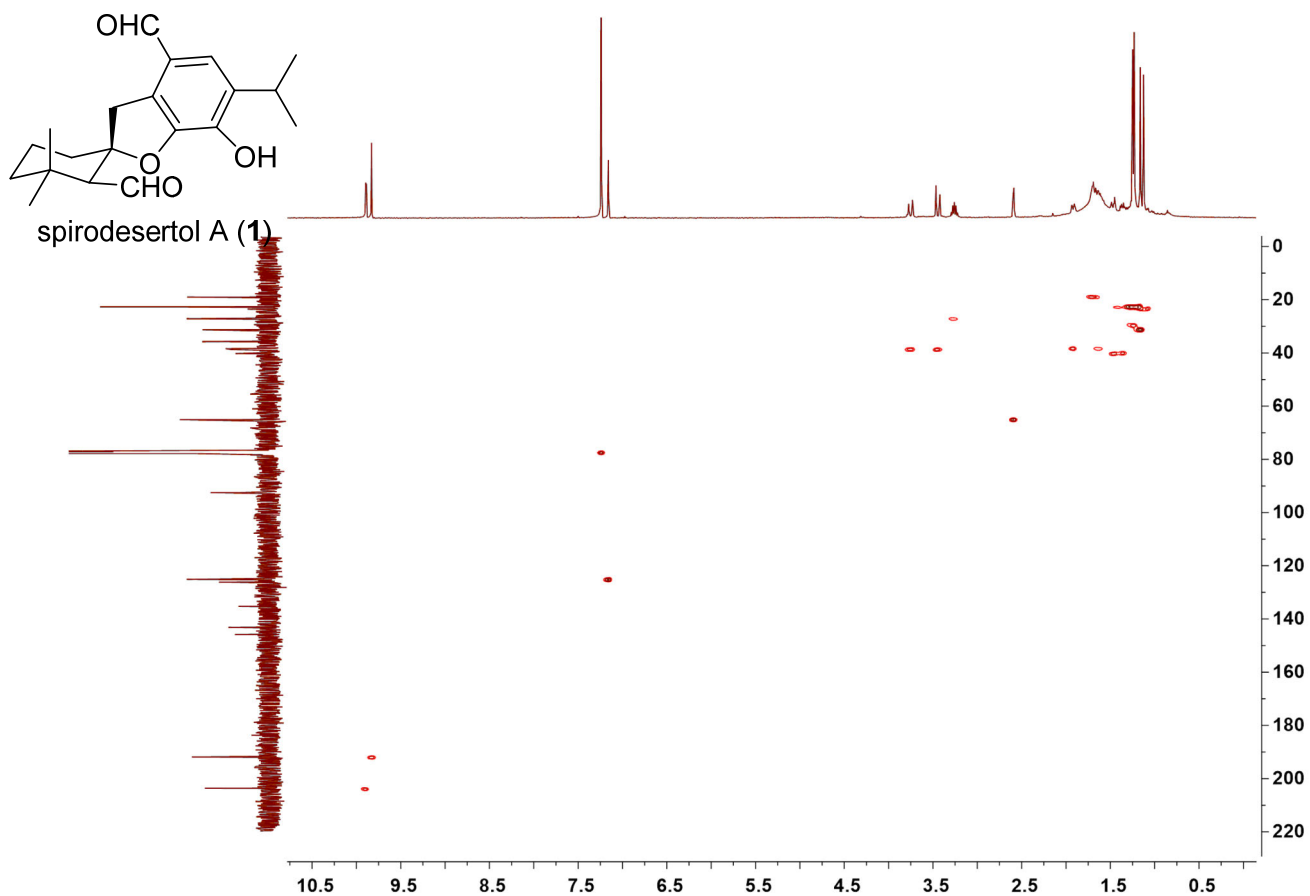

**Figure S15.** HSQC spectrum of compound **1** ( $^1\text{H}$ : 400 MHz,  $^{13}\text{C}$ : 100 MHz, chloroform-*d*)

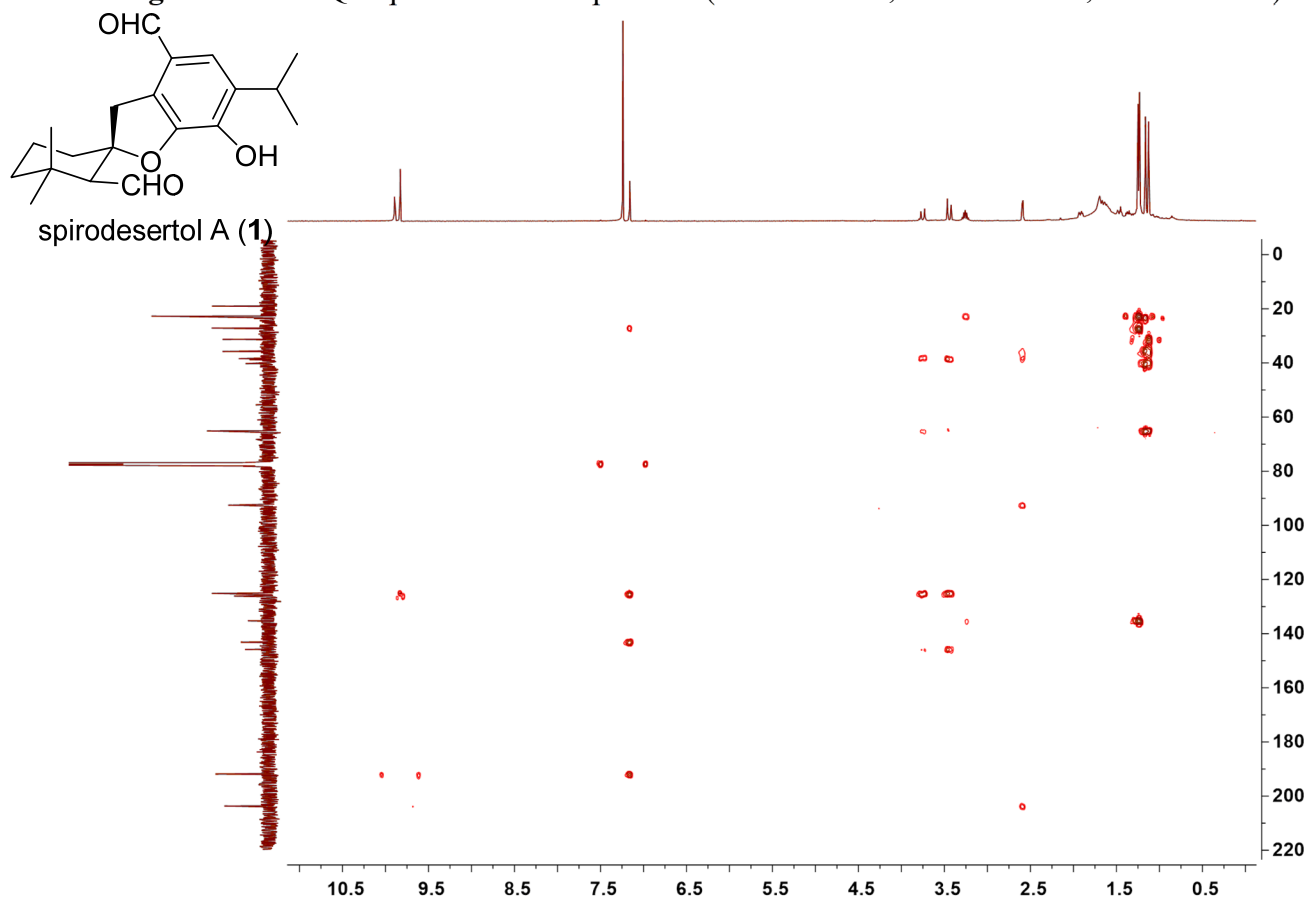

**Figure S16.** HMBC spectrum of compound **1** ( $^1\text{H}$ : 400 MHz,  $^{13}\text{C}$ : 100 MHz, chloroform-*d*)

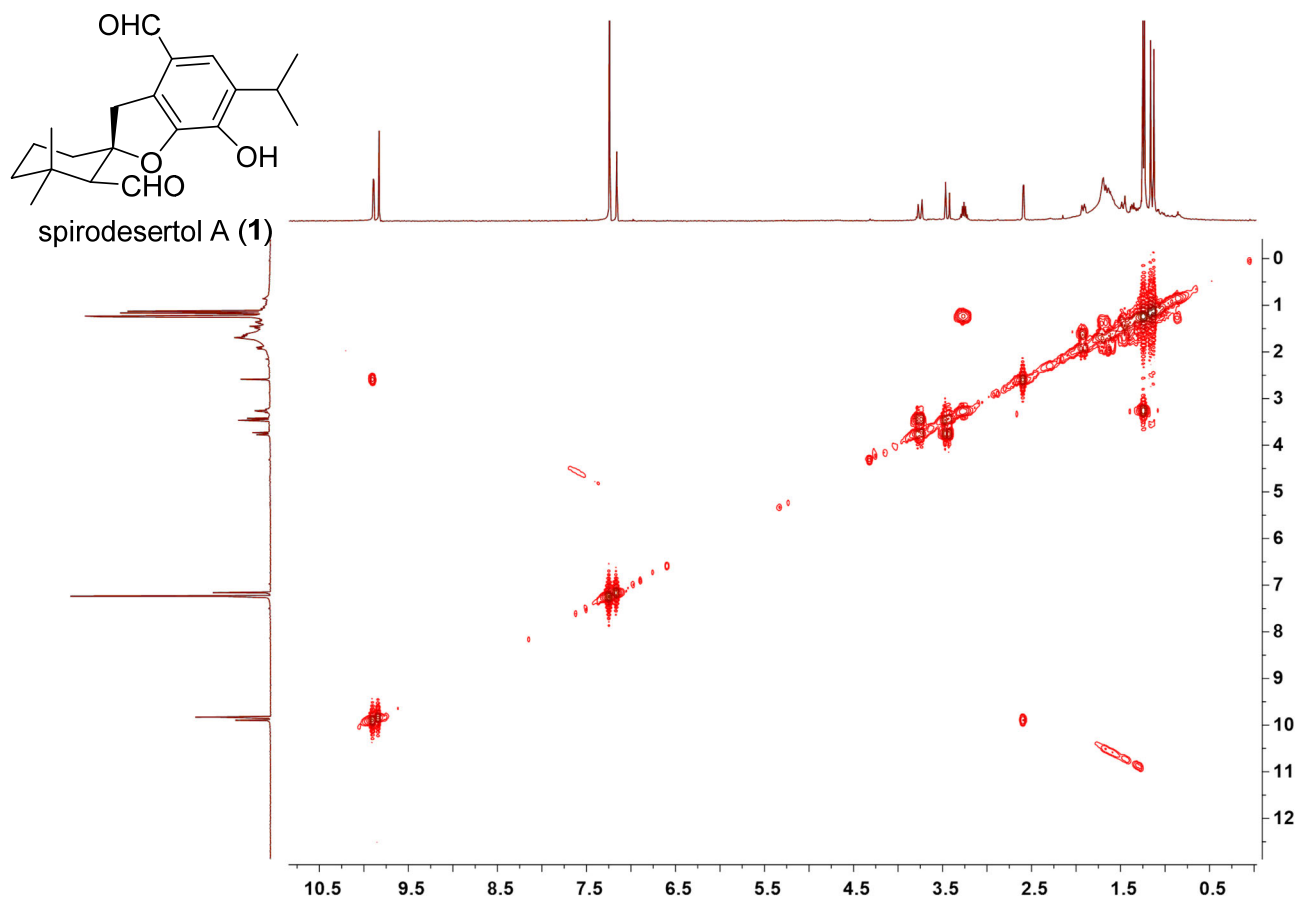

**Figure S17.**  $^1\text{H}$ - $^1\text{H}$  COSY spectrum of compound **1** (400 MHz, chloroform-*d*)

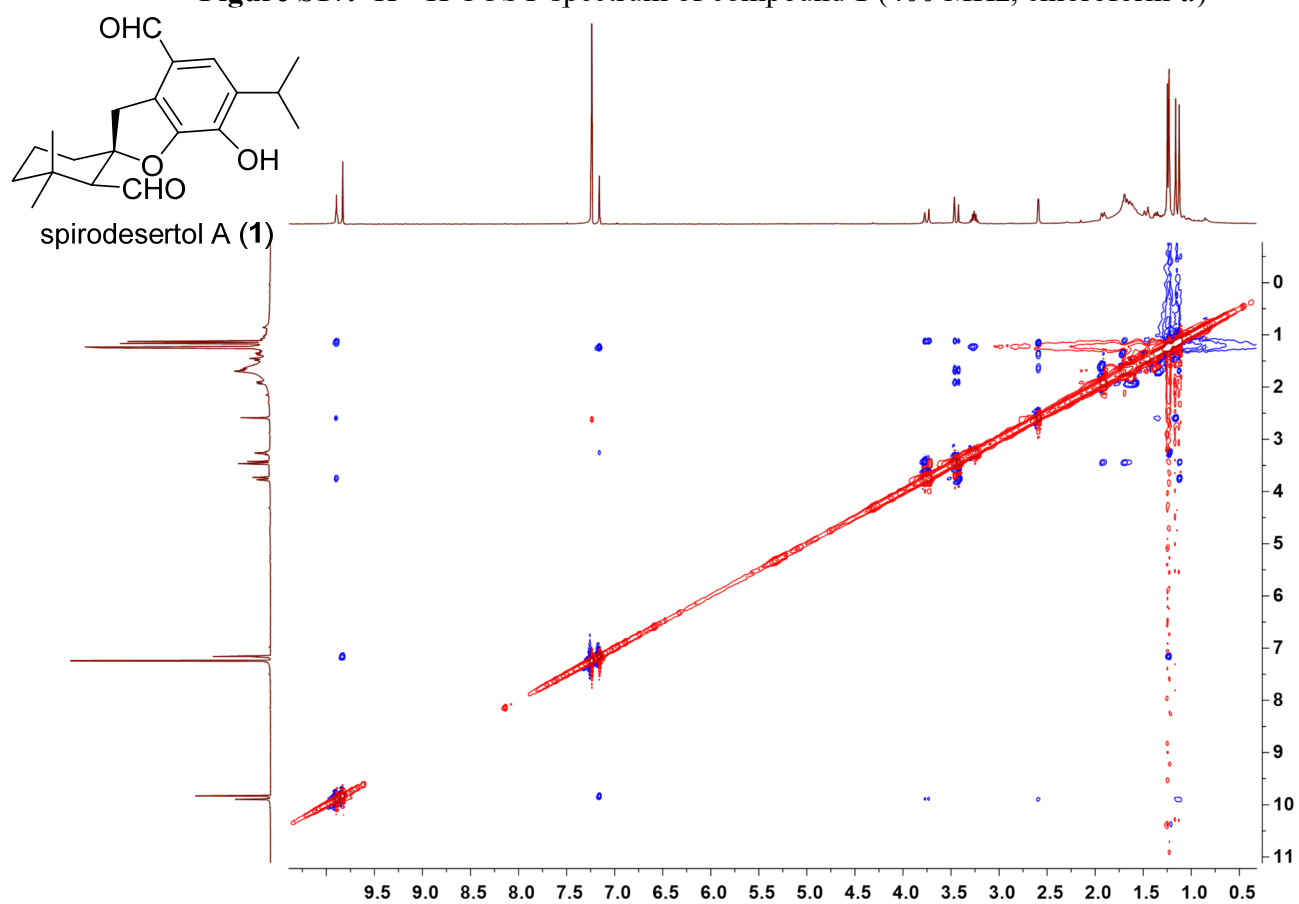

**Figure S18.** NOESY spectrum of compound **1** (400 MHz, chloroform-*d*)

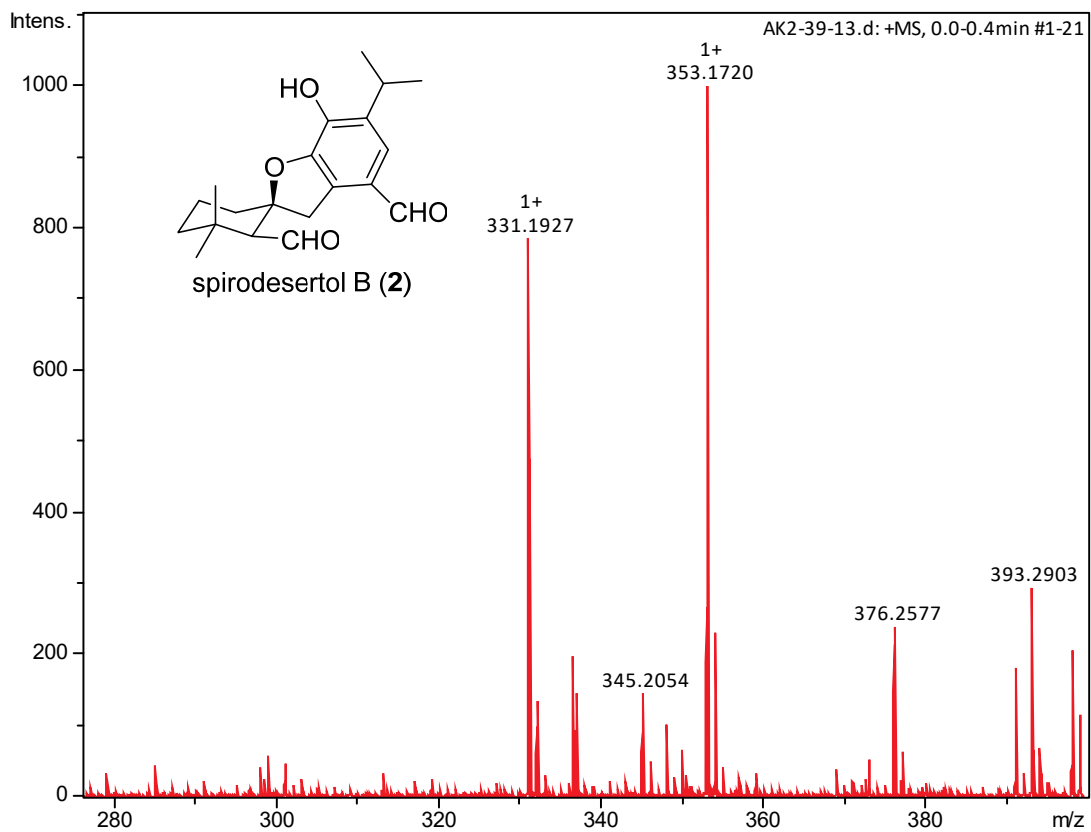

**Figure S19.** The HRESIMS spectrum of compound **2**

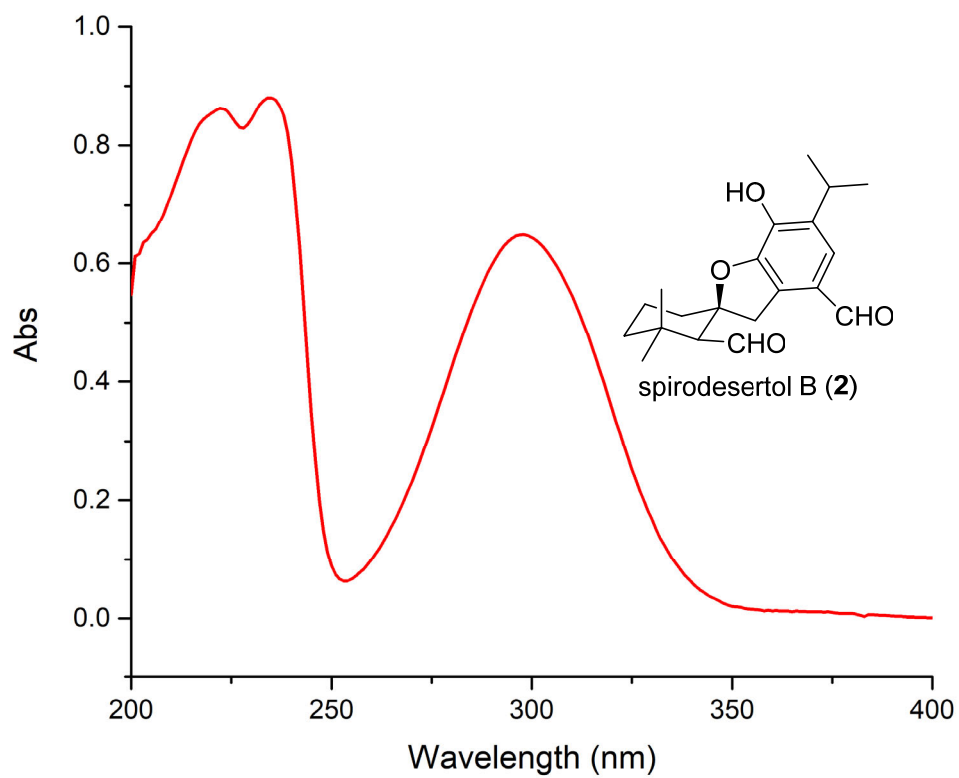

**Figure S20.** The UV spectrum of compound **2**

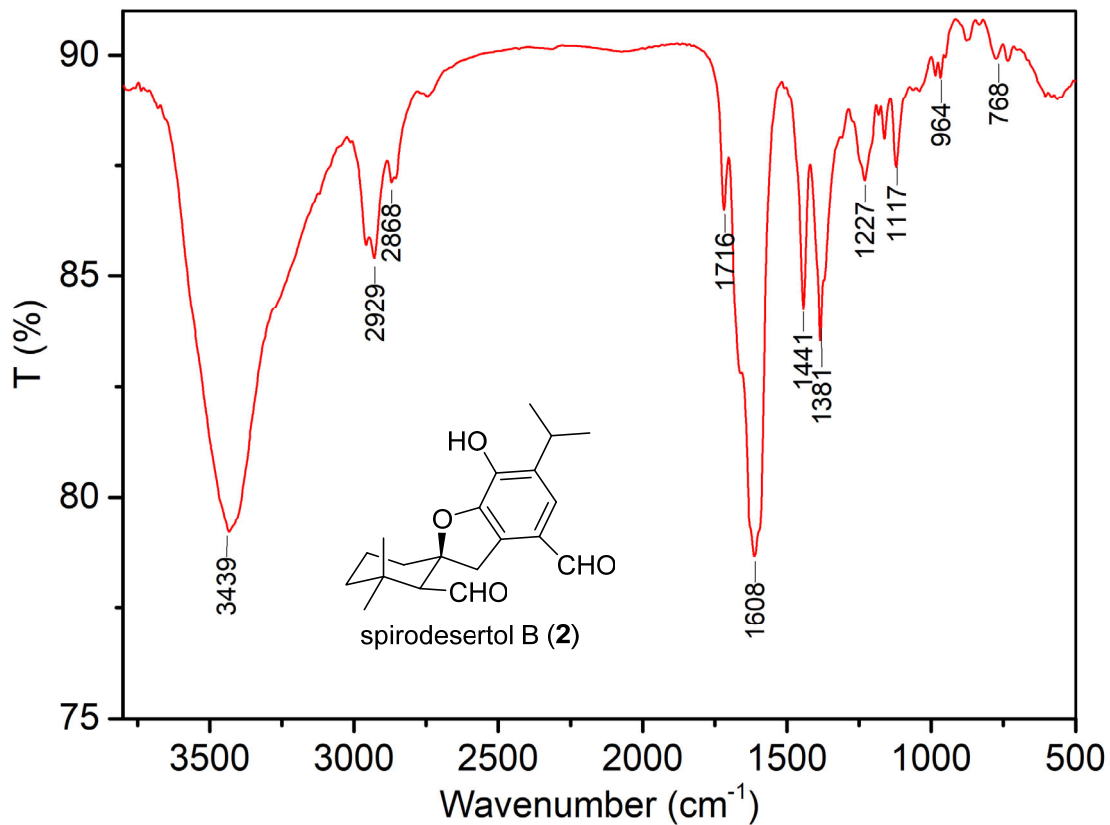

Figure S21. The IR spectrum of compound 2

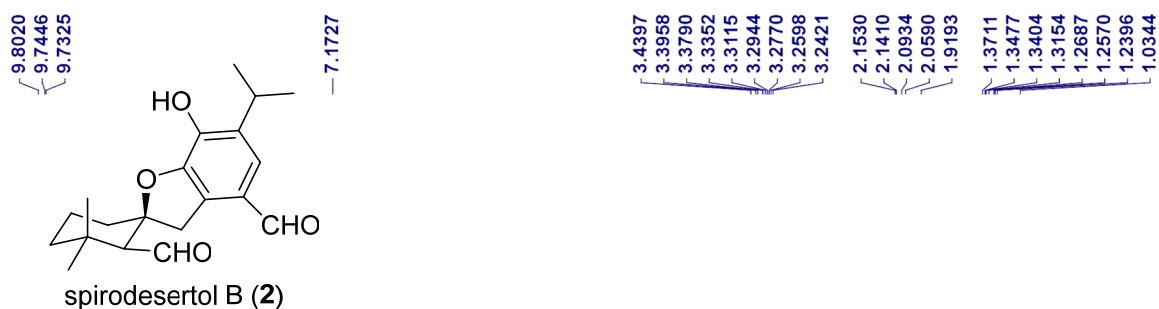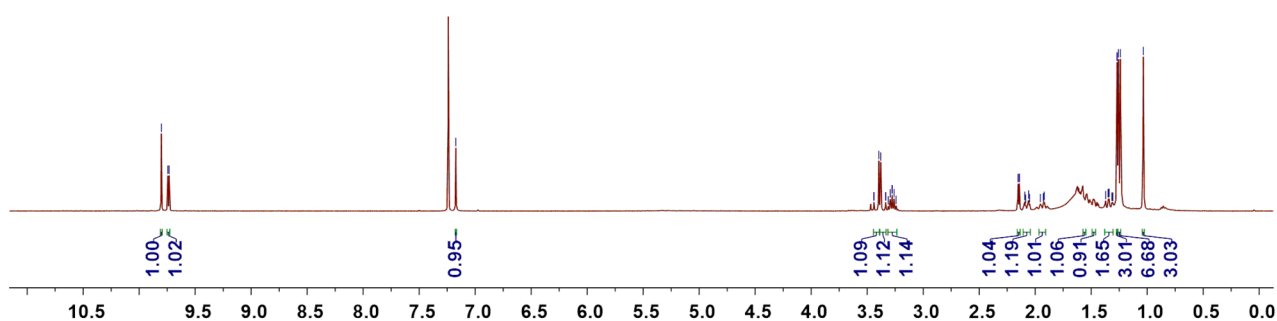

Figure S22.  $^1\text{H}$  NMR spectrum of compound 2 (400 MHz,  $\text{CDCl}_3$ )

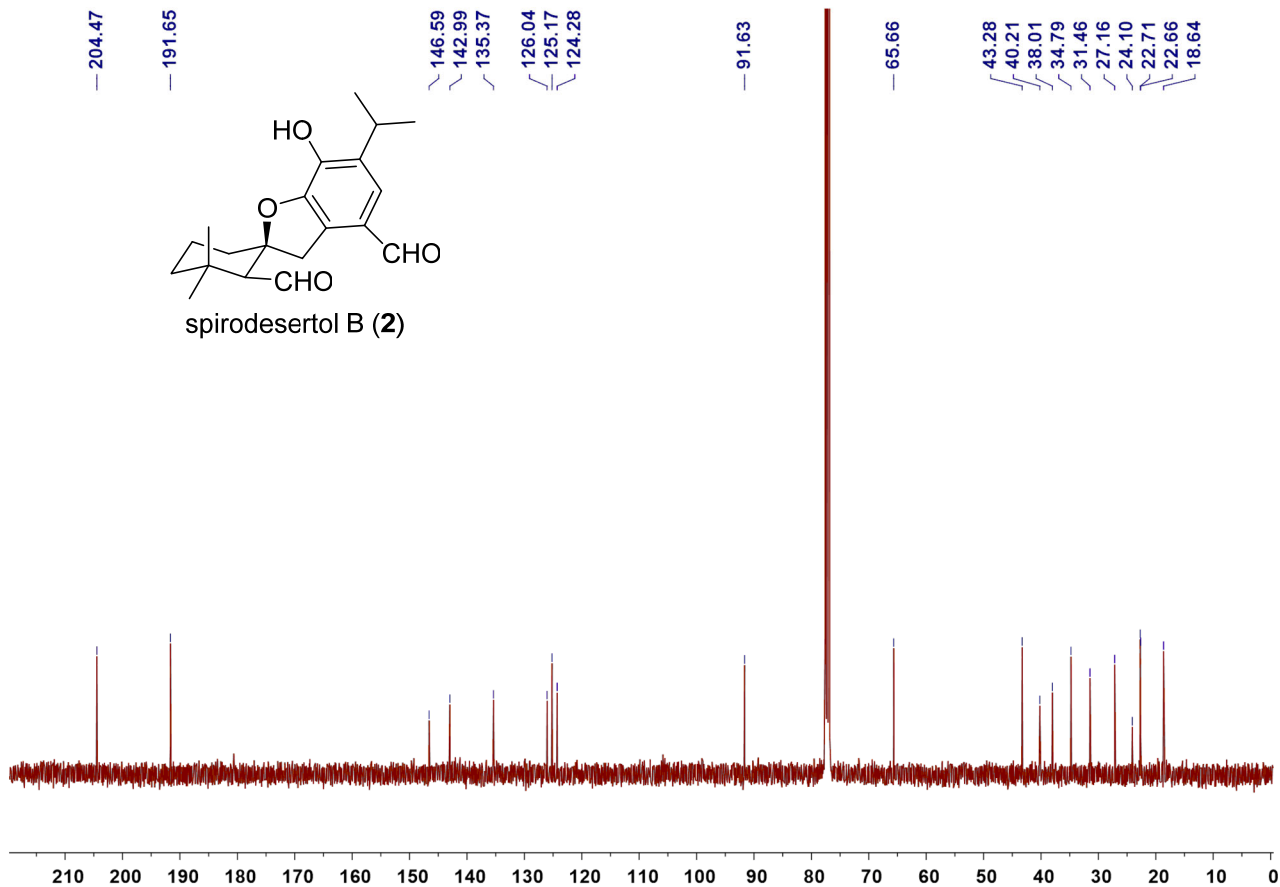

**Figure S23.**  $^{13}\text{C}$  NMR spectrum of compound **2** (100 MHz, chloroform-*d*)

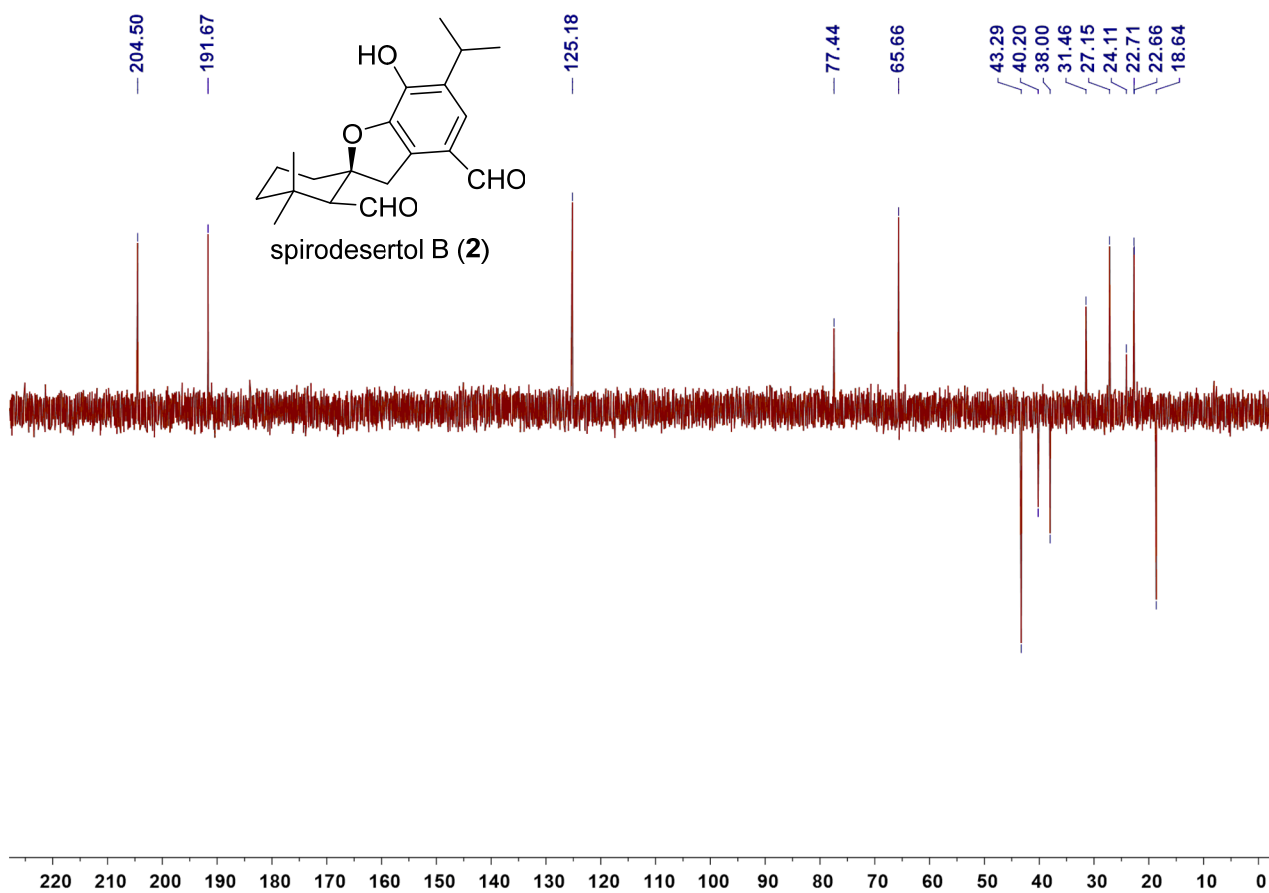

**Figure S24.** DEPT spectrum of compound **2** (100 MHz, chloroform-*d*)

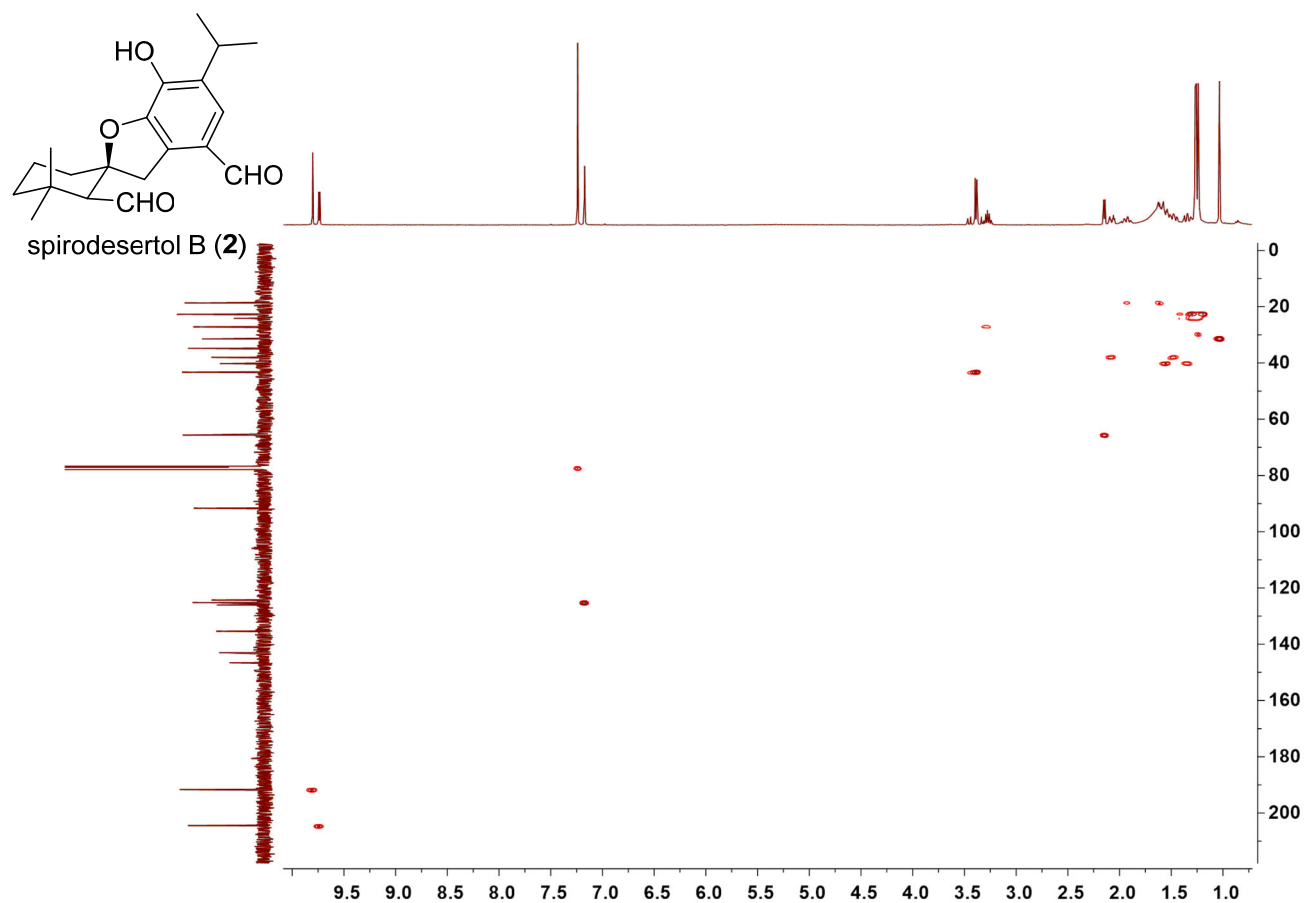

Figure S25. HSQC spectrum of compound 2 ( $^1\text{H}$ : 400 MHz,  $^{13}\text{C}$ : 100 MHz, chloroform-*d*)

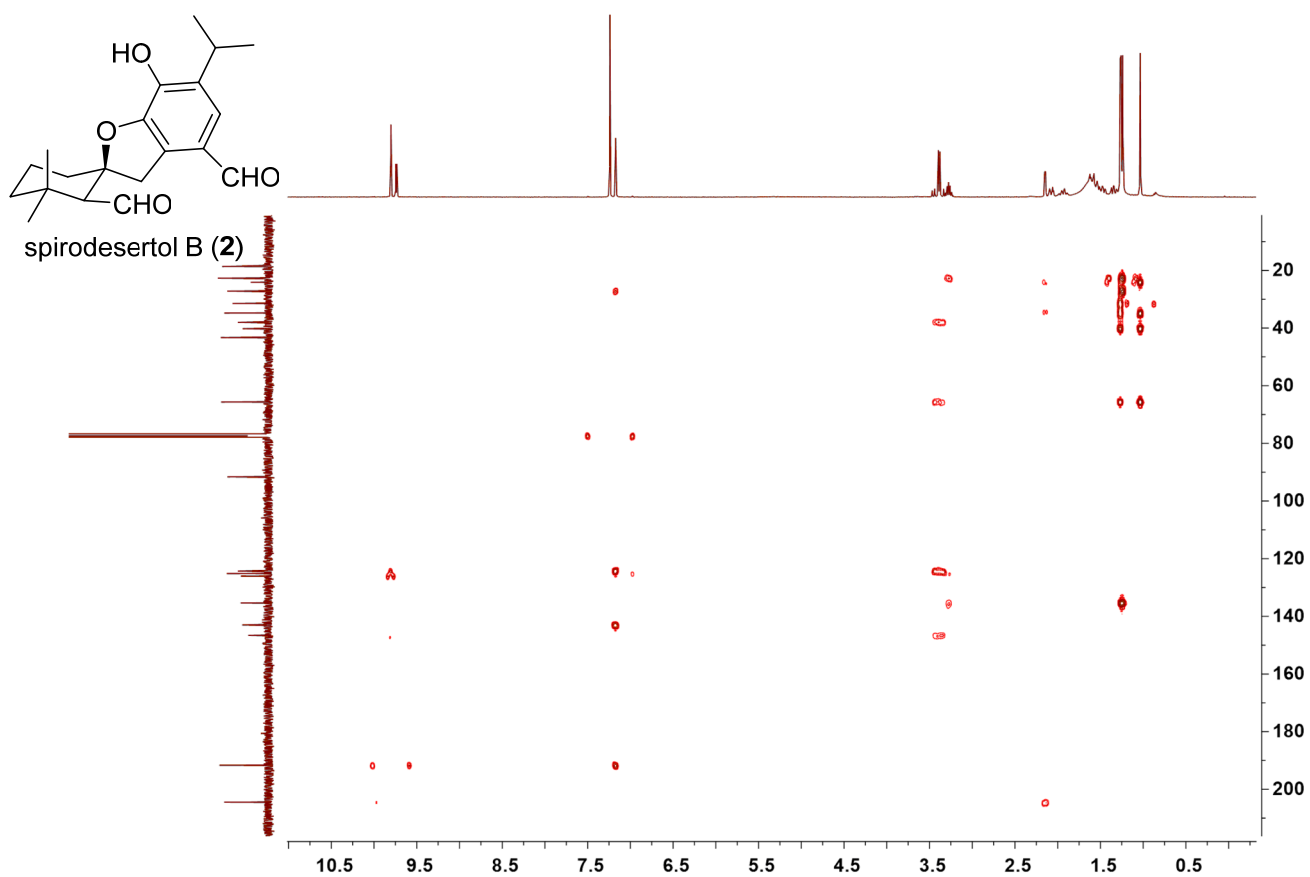

Figure S26. HMBC spectrum of compound 2 ( $^1\text{H}$ : 400 MHz,  $^{13}\text{C}$ : 100 MHz, chloroform-*d*)



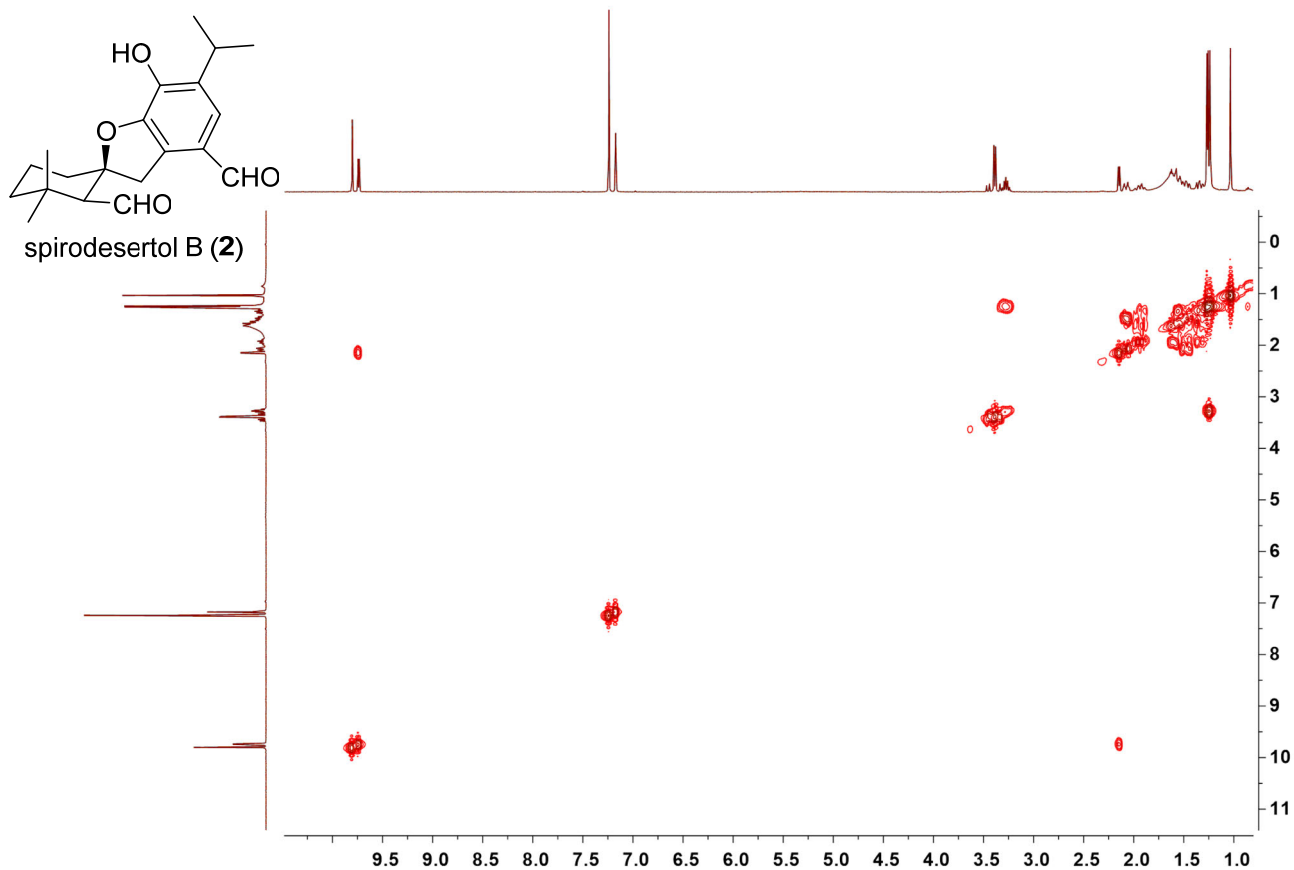

**Figure S27.**  $^1\text{H}$ - $^1\text{H}$  COSY spectrum of compound **2** (400 MHz, chloroform-*d*)

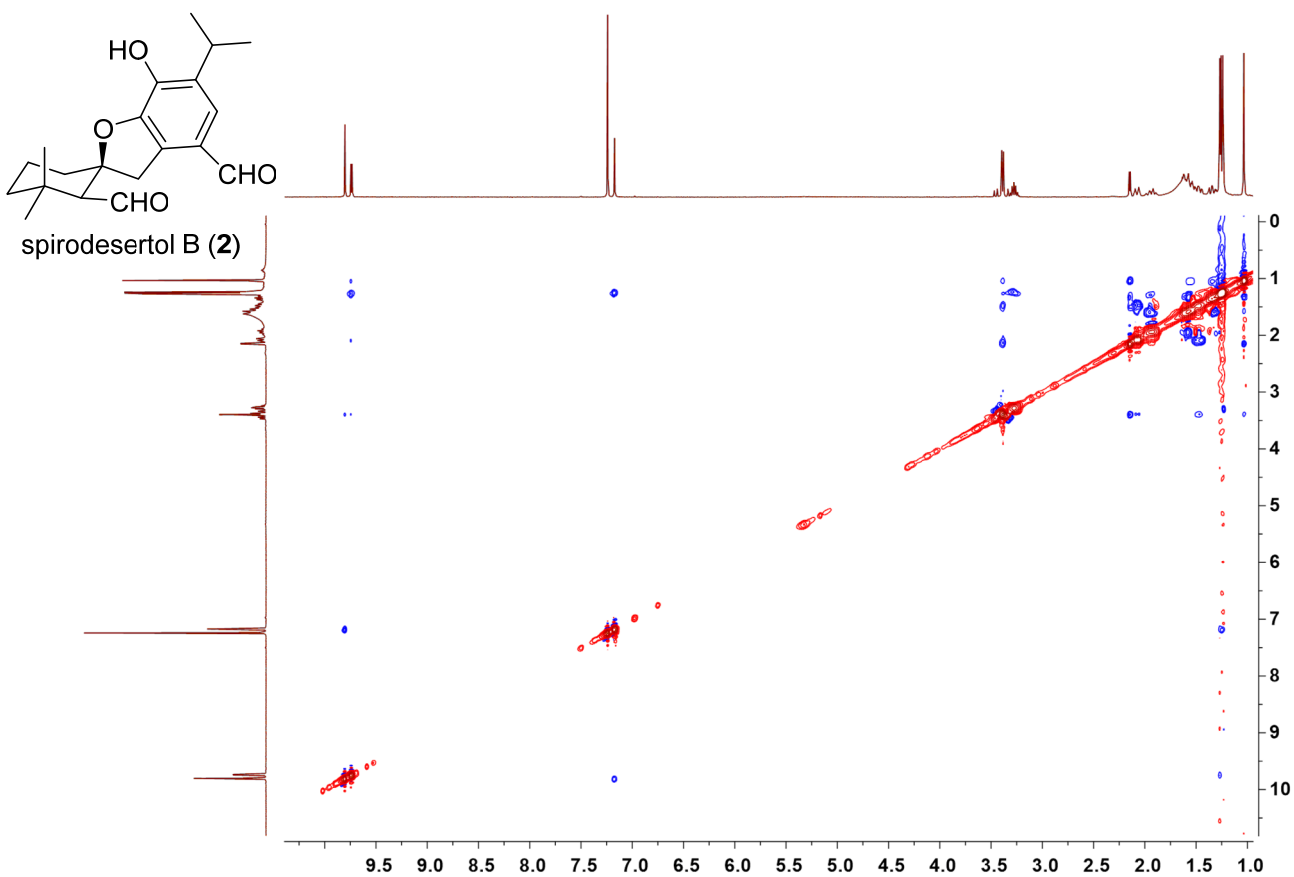

**Figure S28.** NOESY spectrum of compound **2** (400 MHz, chloroform-*d*)

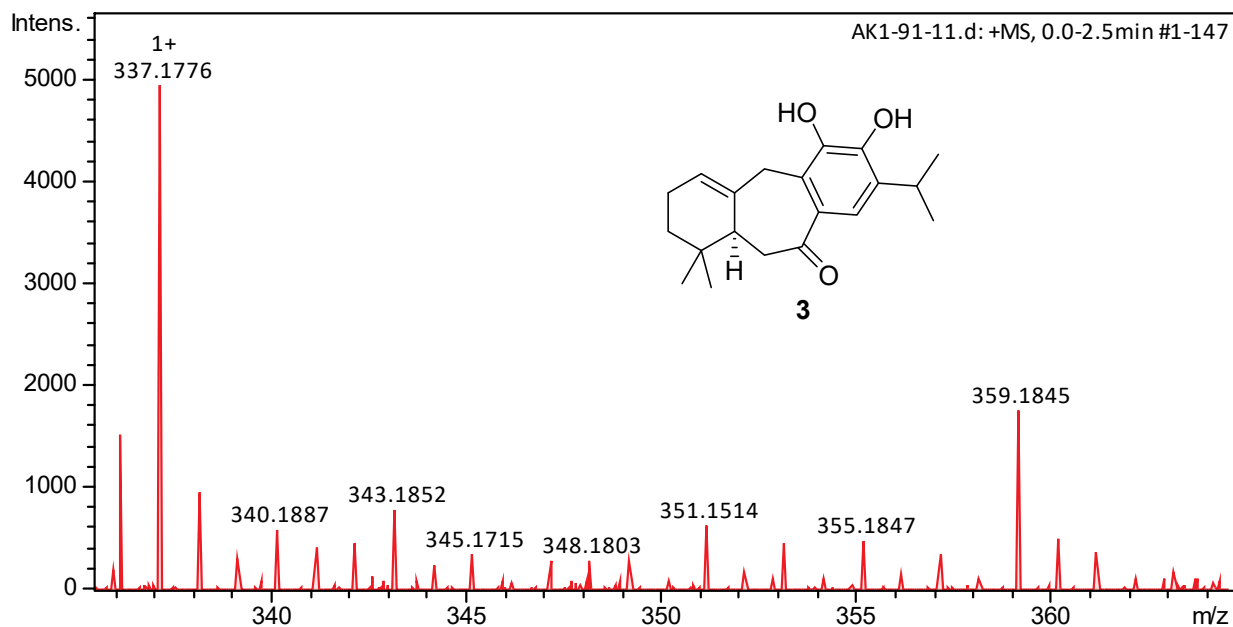

**Figure S29.** The HRESIMS spectrum of compound **3**

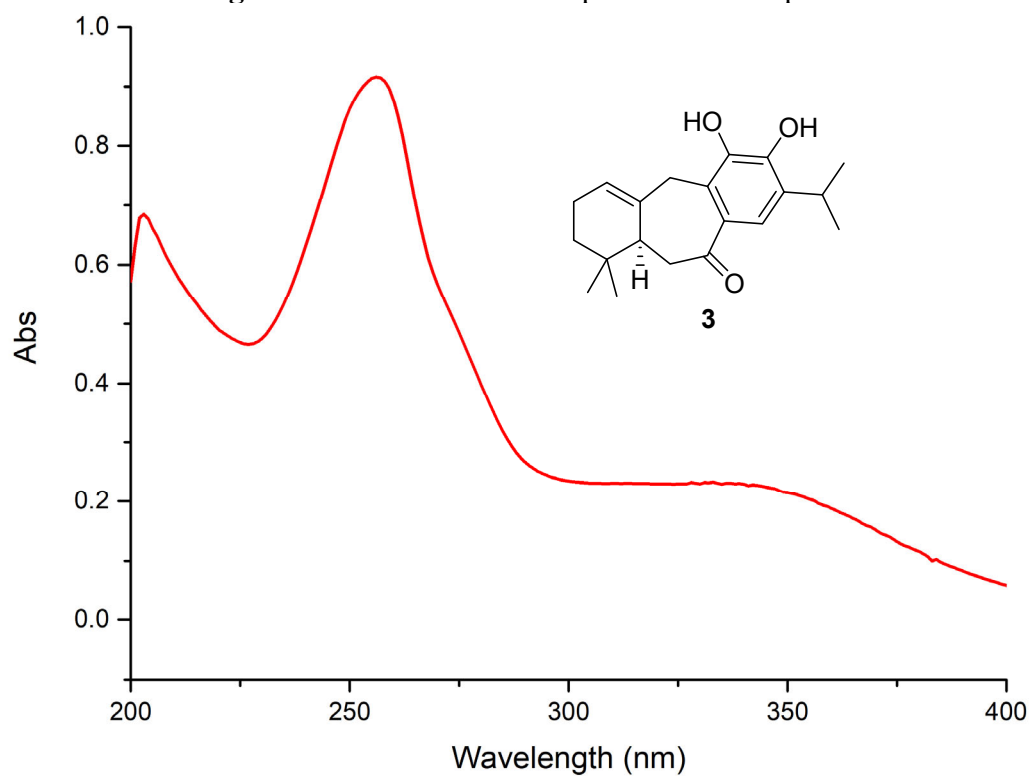

**Figure S30.** The UV spectrum of compound **3**

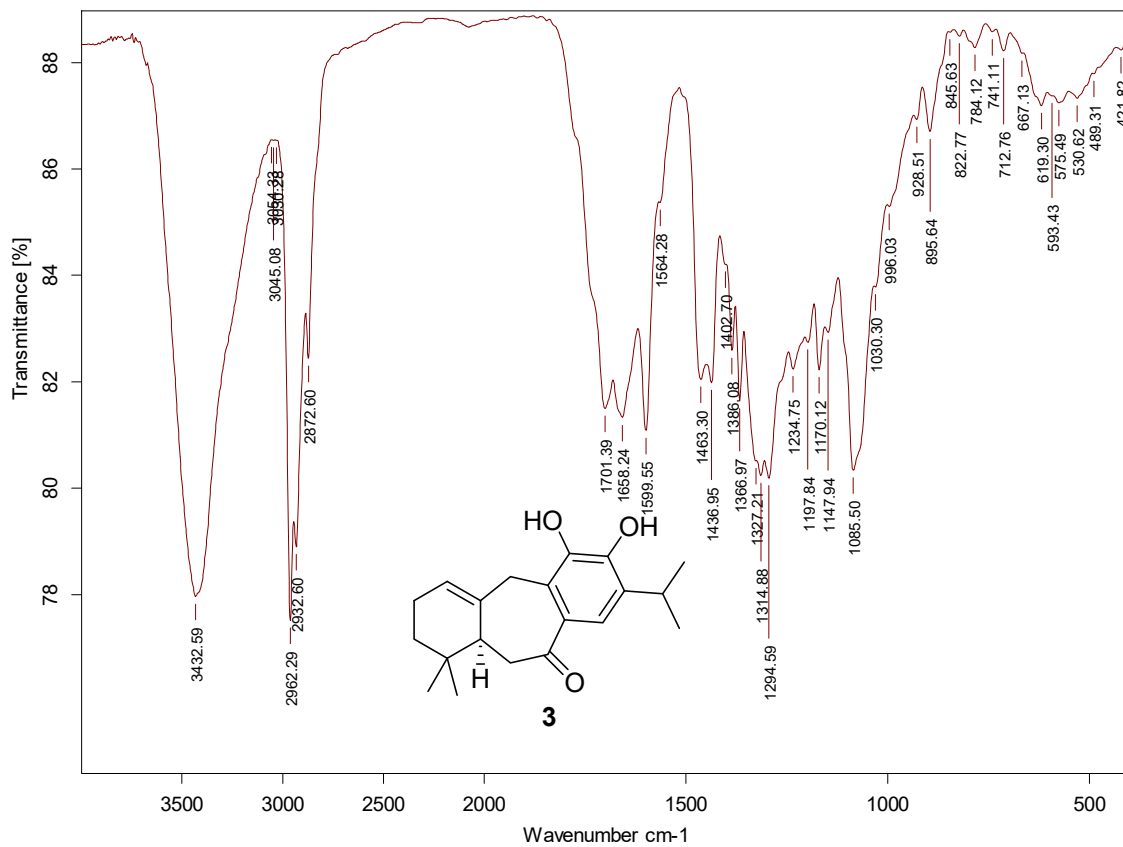

Figure S31. The IR spectrum of compound **3**

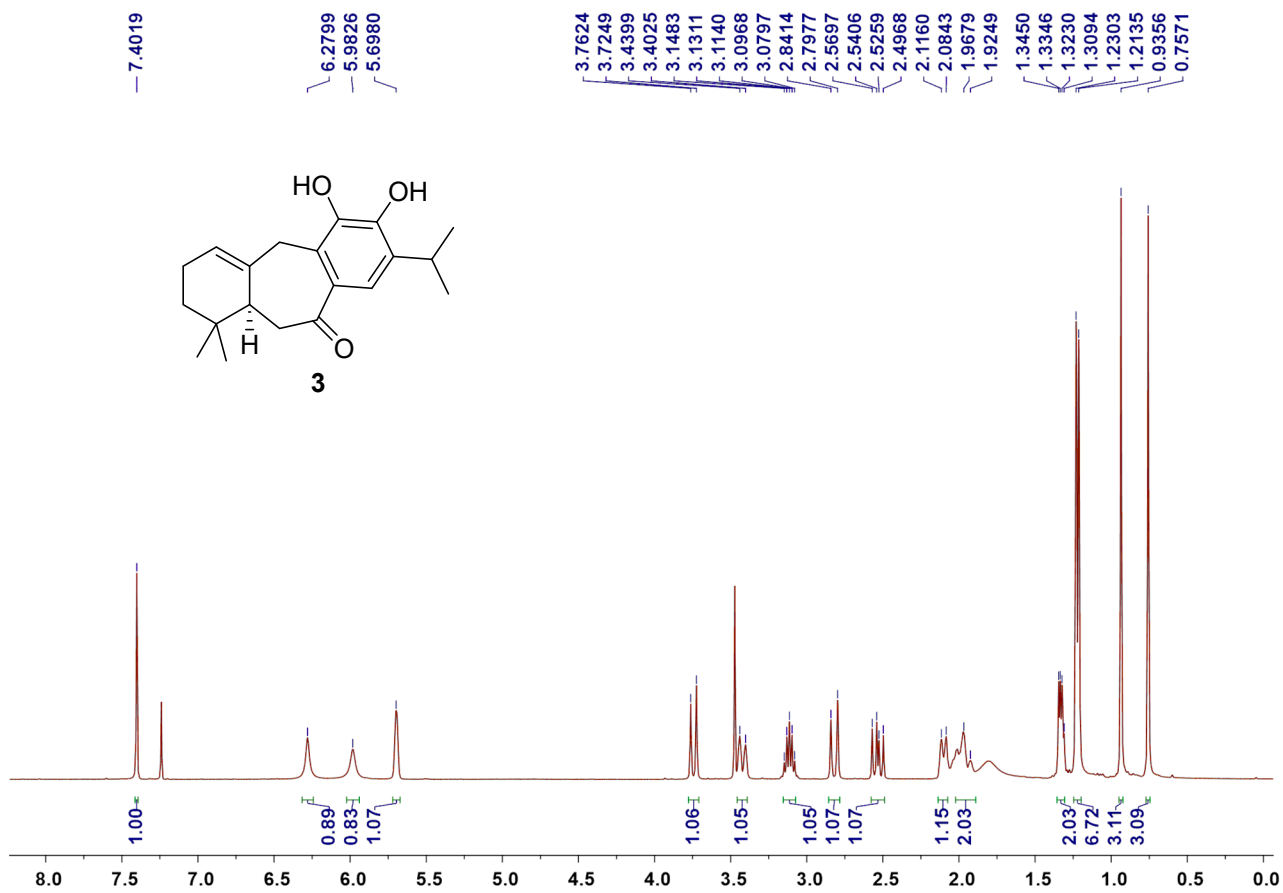

Figure S32. <sup>1</sup>H NMR spectrum of compound **3** (400 MHz, chloroform-*d*)

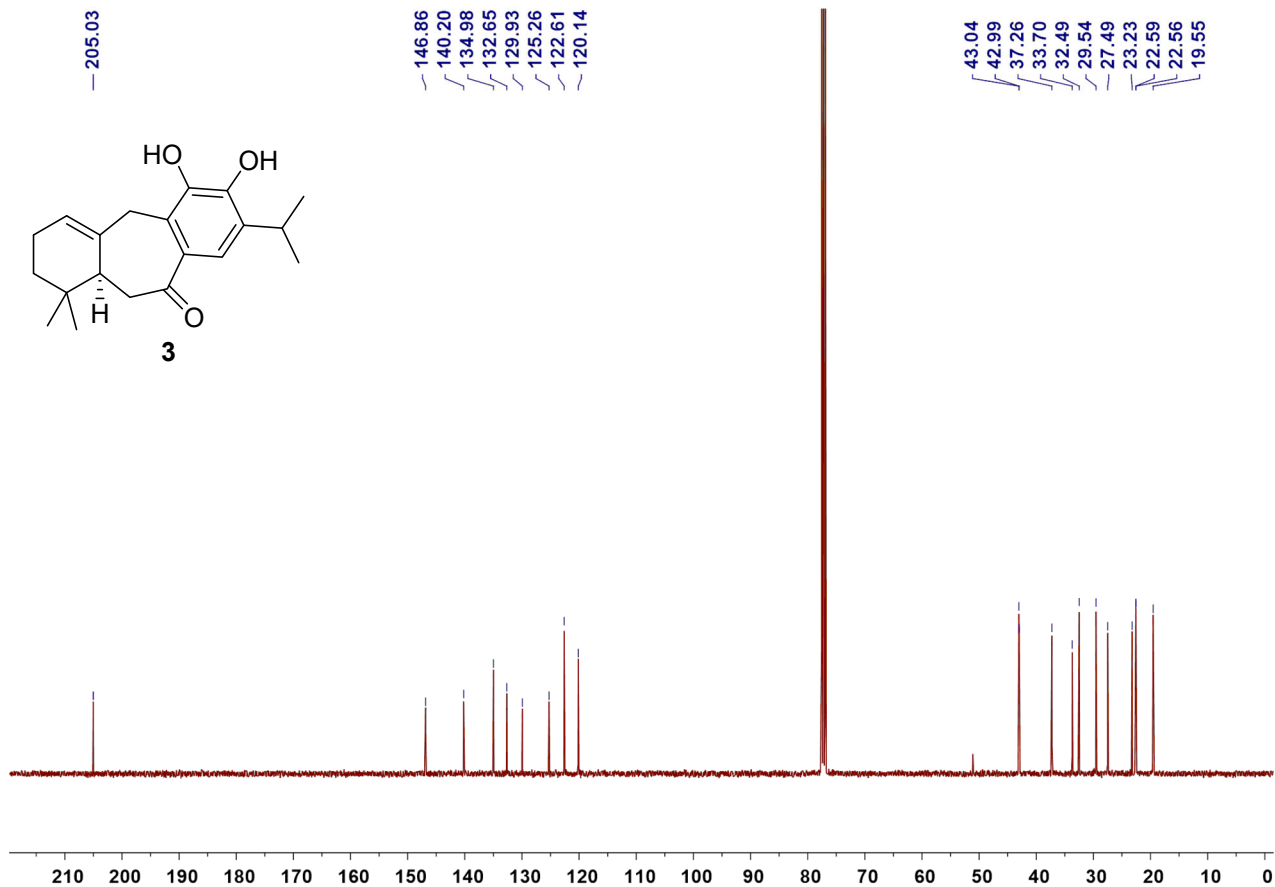

Figure S33. <sup>13</sup>C NMR spectrum of compound **3** (100 MHz, chloroform-*d*)

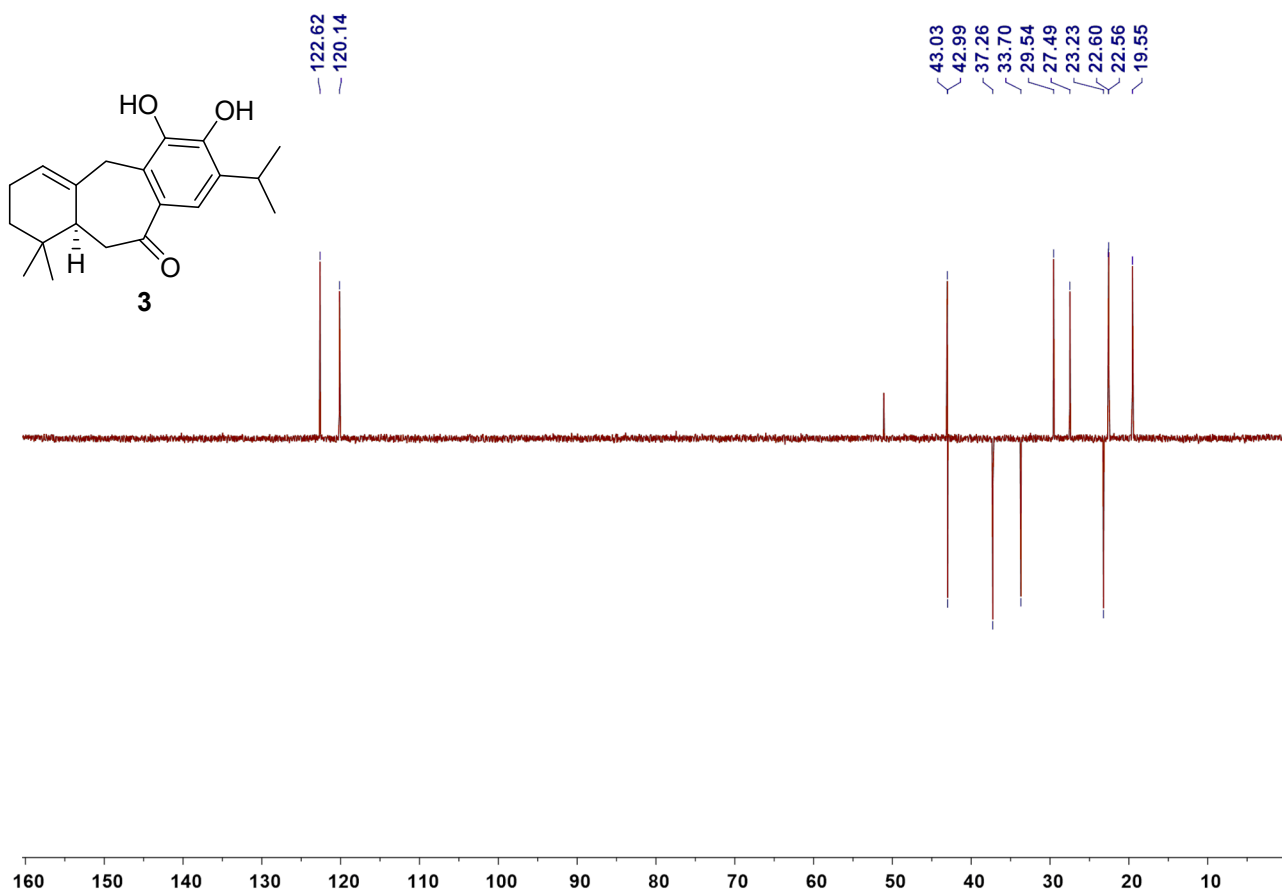

Figure S34. DEPT-135 spectrum of compound **3** (100 MHz, chloroform-*d*)

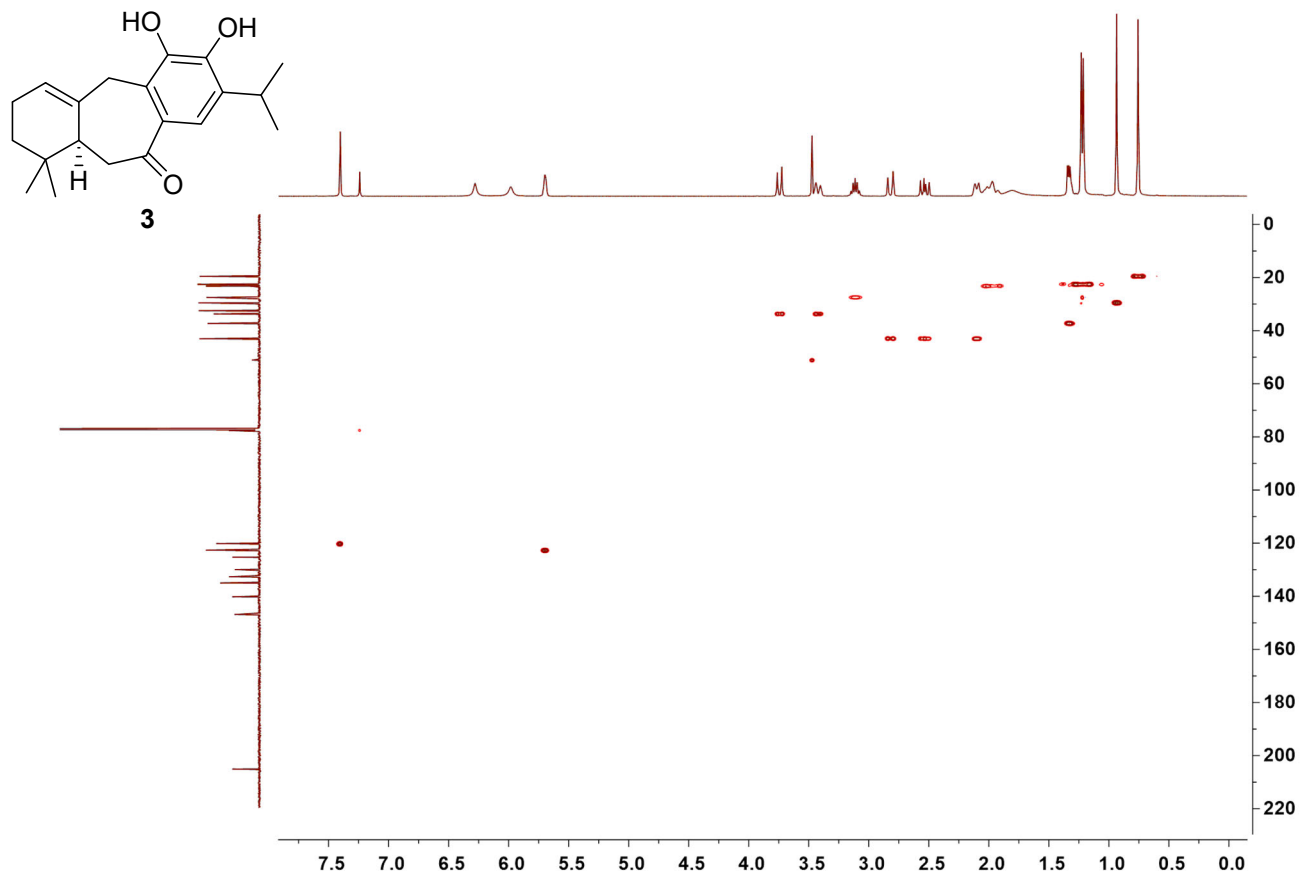

**Figure S35.** HSQC spectrum of compound **3** ( $^1\text{H}$ : 400 MHz,  $^{13}\text{C}$ : 100 MHz, chloroform-*d*)

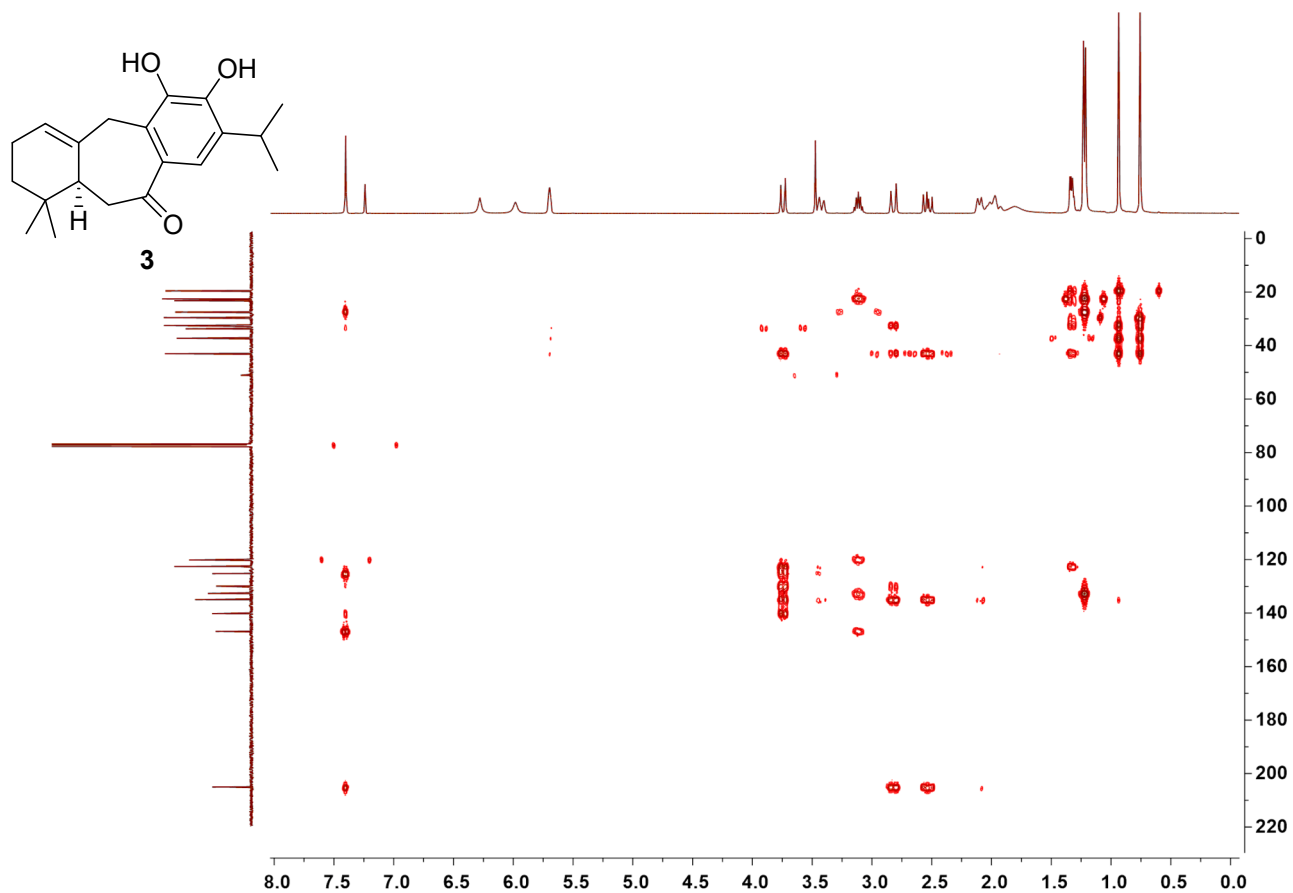

**Figure S36.** HMBC spectrum of compound **3** ( $^1\text{H}$ : 400 MHz,  $^{13}\text{C}$ : 100 MHz, chloroform-*d*)

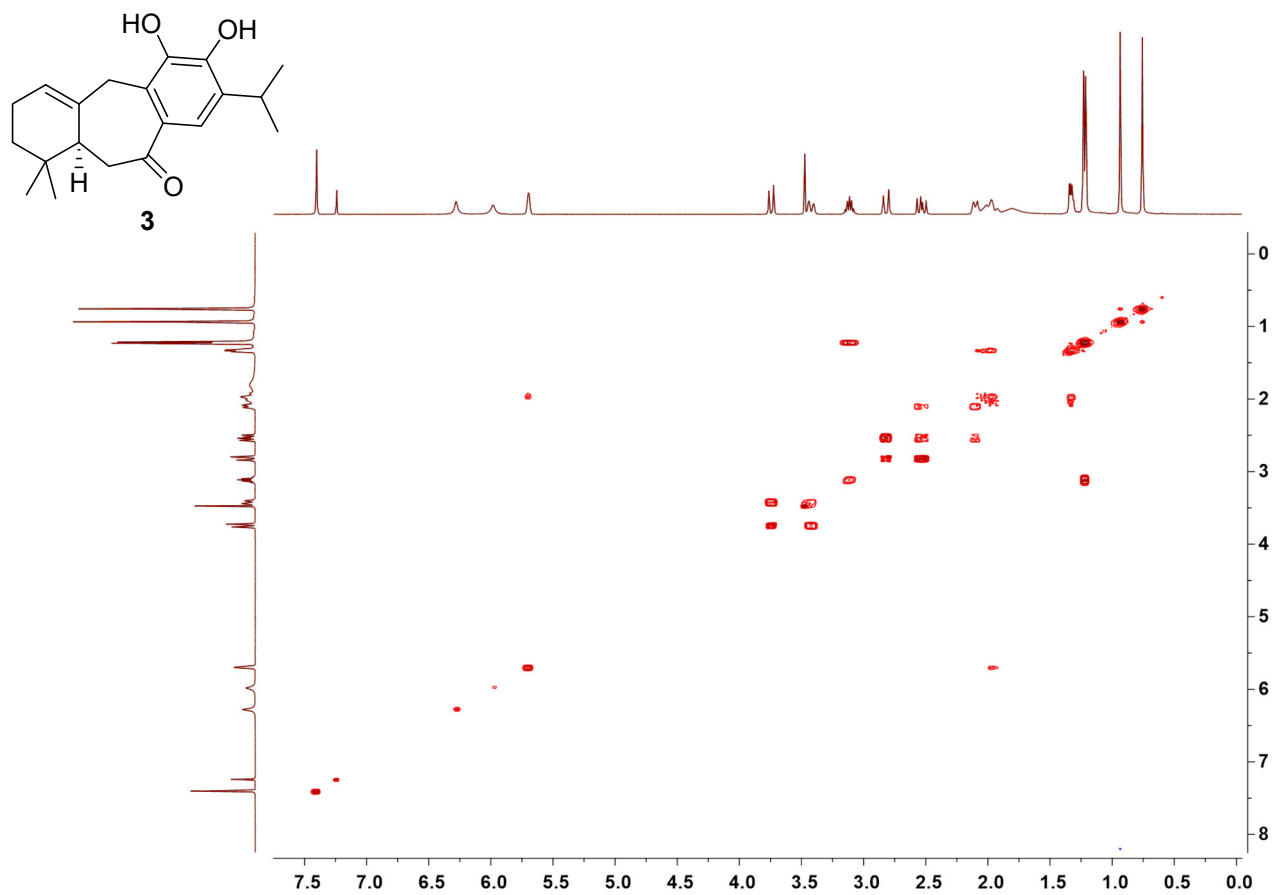

**Figure S37.**  $^1\text{H}$ - $^1\text{H}$  COSY spectrum of compound **3** (400 MHz, chloroform-*d*)

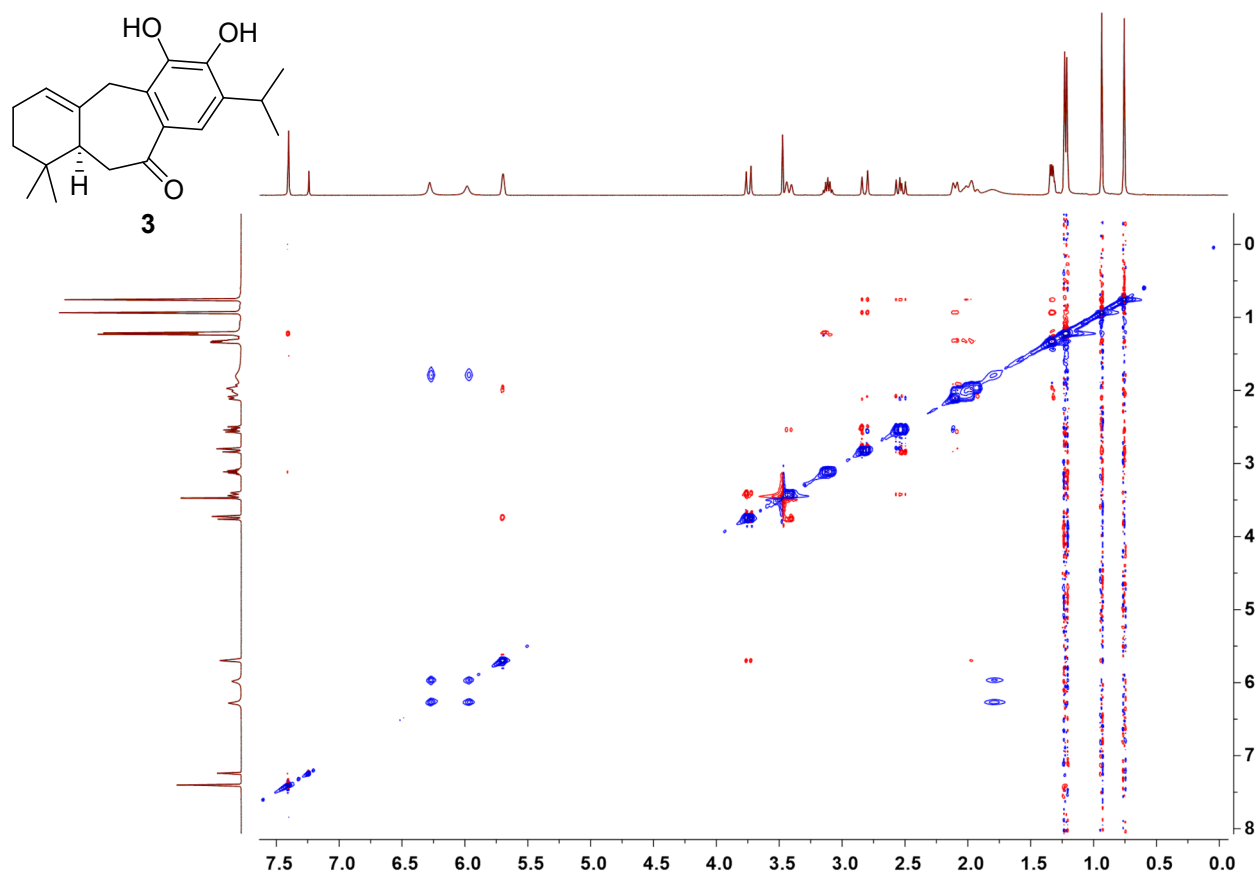

**Figure S38.** NOESY spectrum of compound **3** (400 MHz, chloroform-*d*)

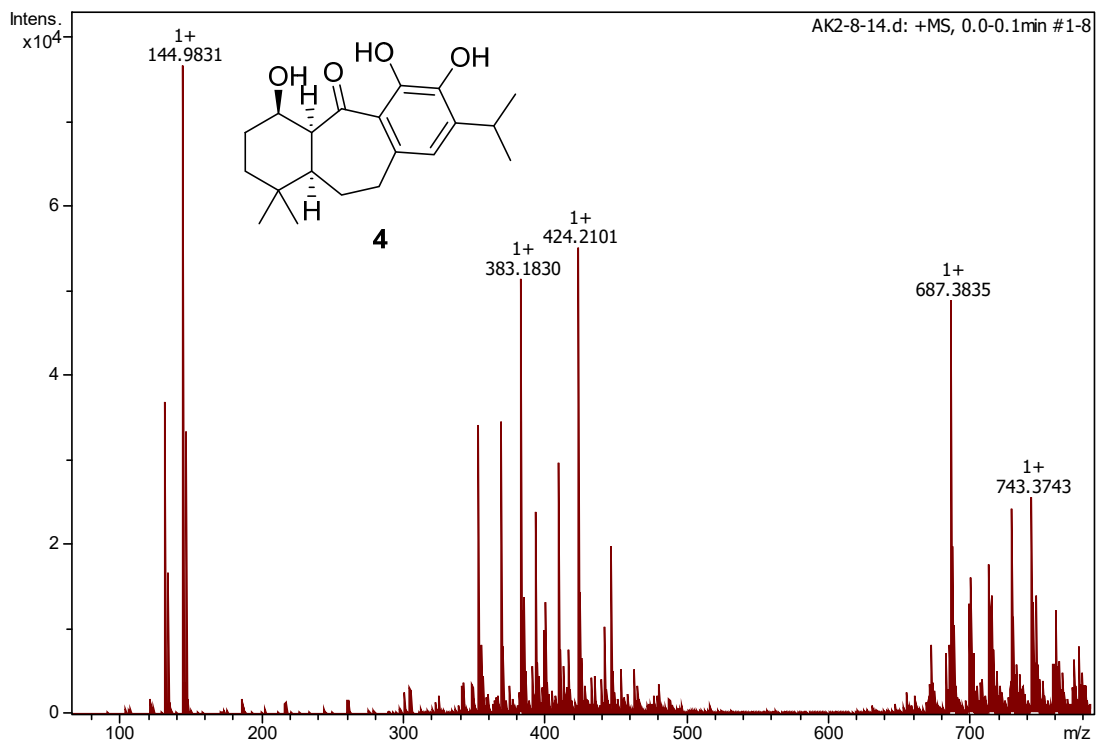

Figure S39. The HRESIMS spectrum of compound 4

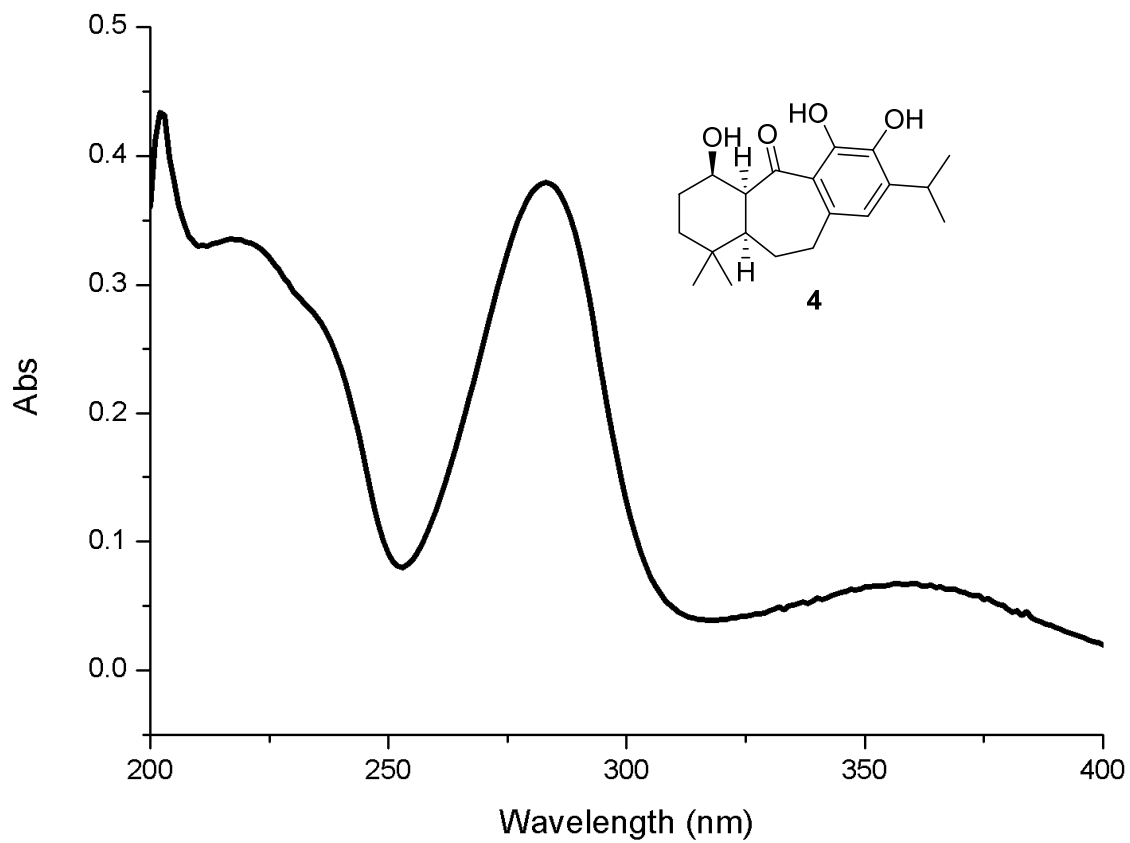

Figure S40. The UV spectrum of compound 4

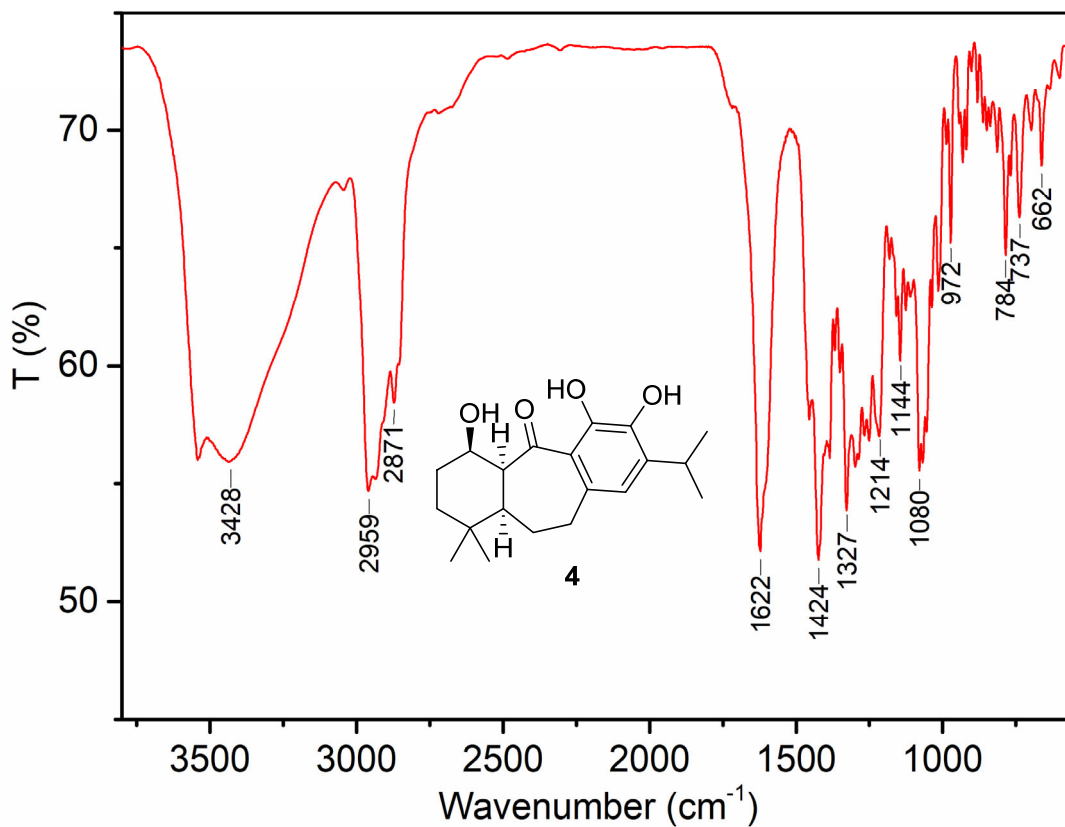

Figure S41. The IR spectrum of compound 4

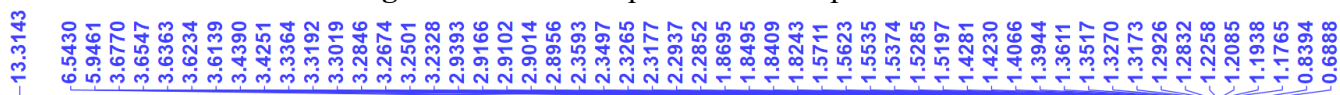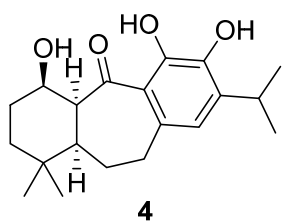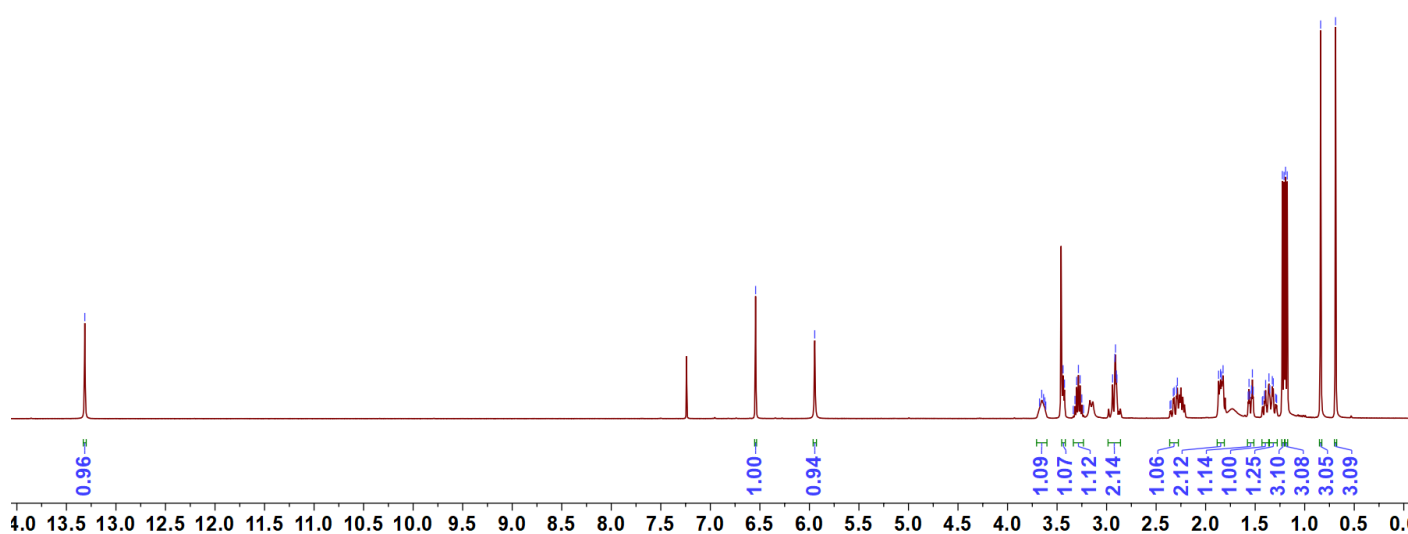

Figure S42. <sup>1</sup>H NMR spectrum of compound 4 (400 MHz, chloroform-d)



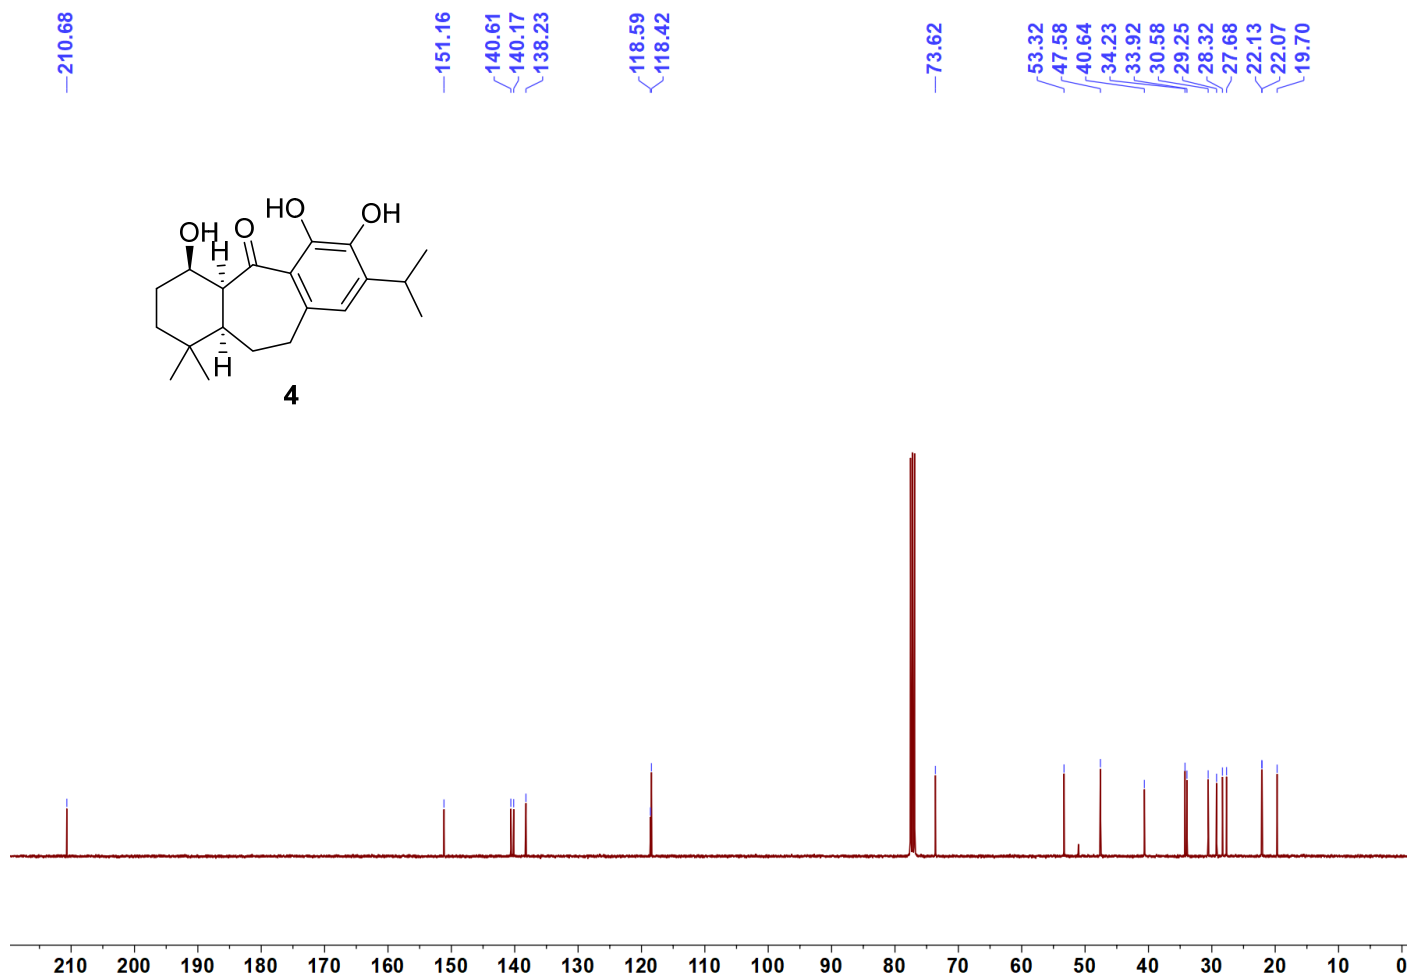

Figure S43.  $^{13}\text{C}$  NMR spectrum of compound **4** (100 MHz, chloroform-*d*)

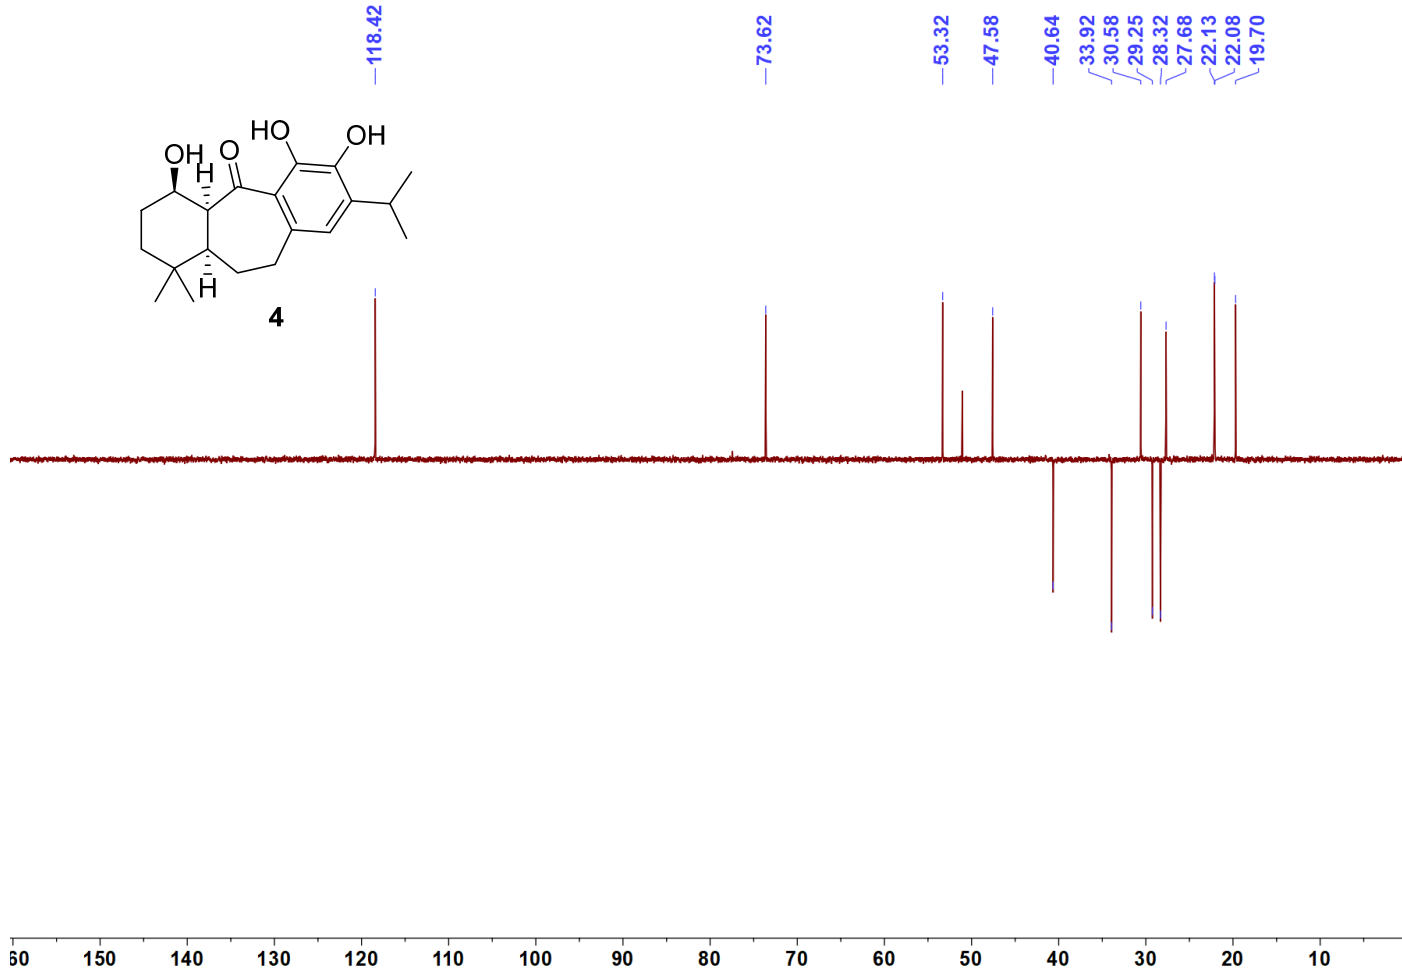

Figure S44. DEPT-135 spectrum of compound **4** (100 MHz, chloroform-*d*)

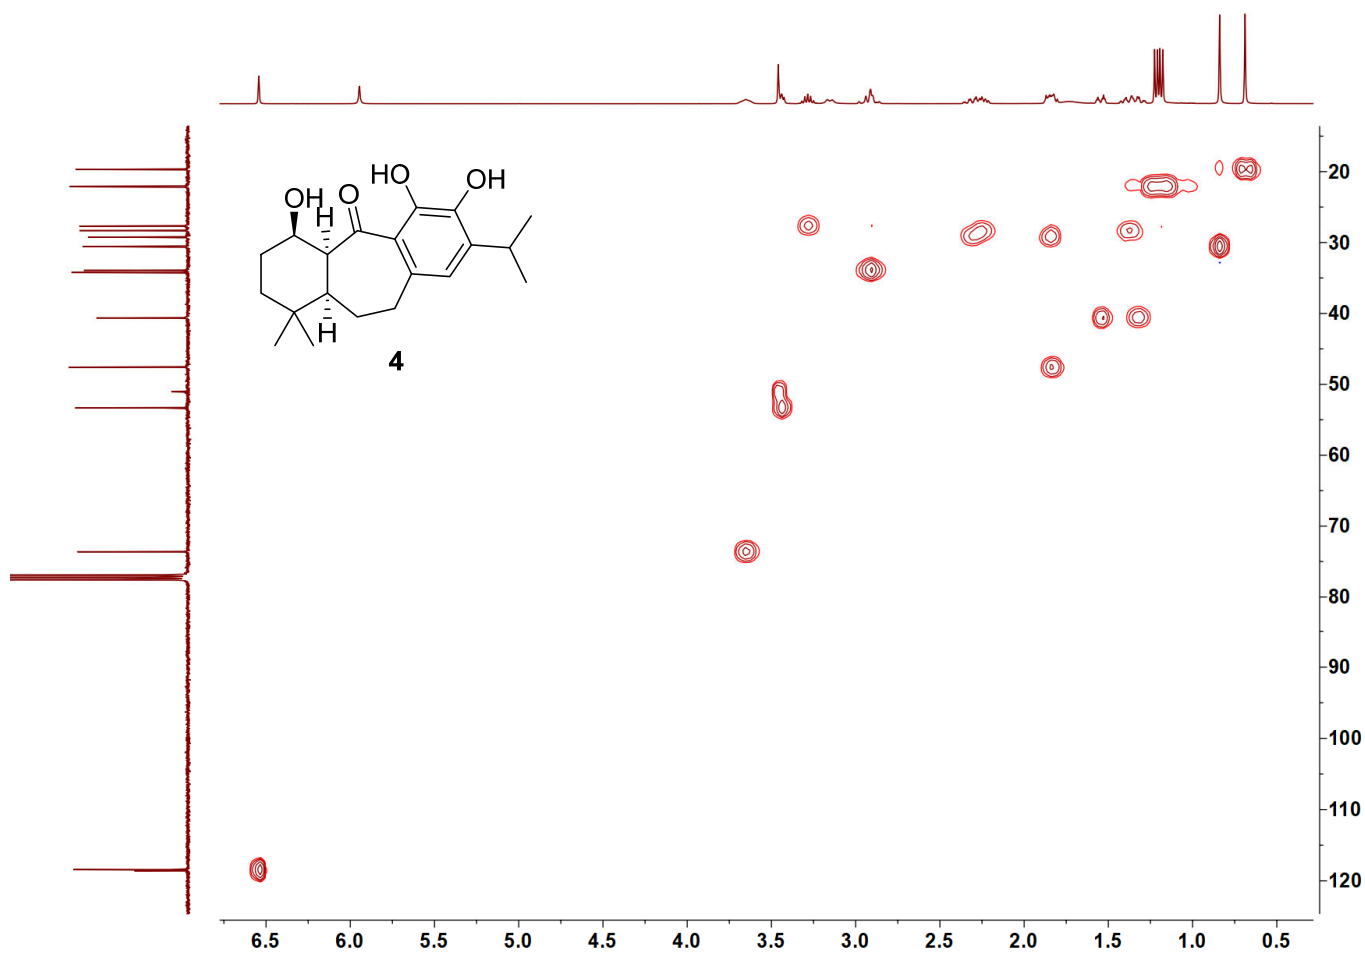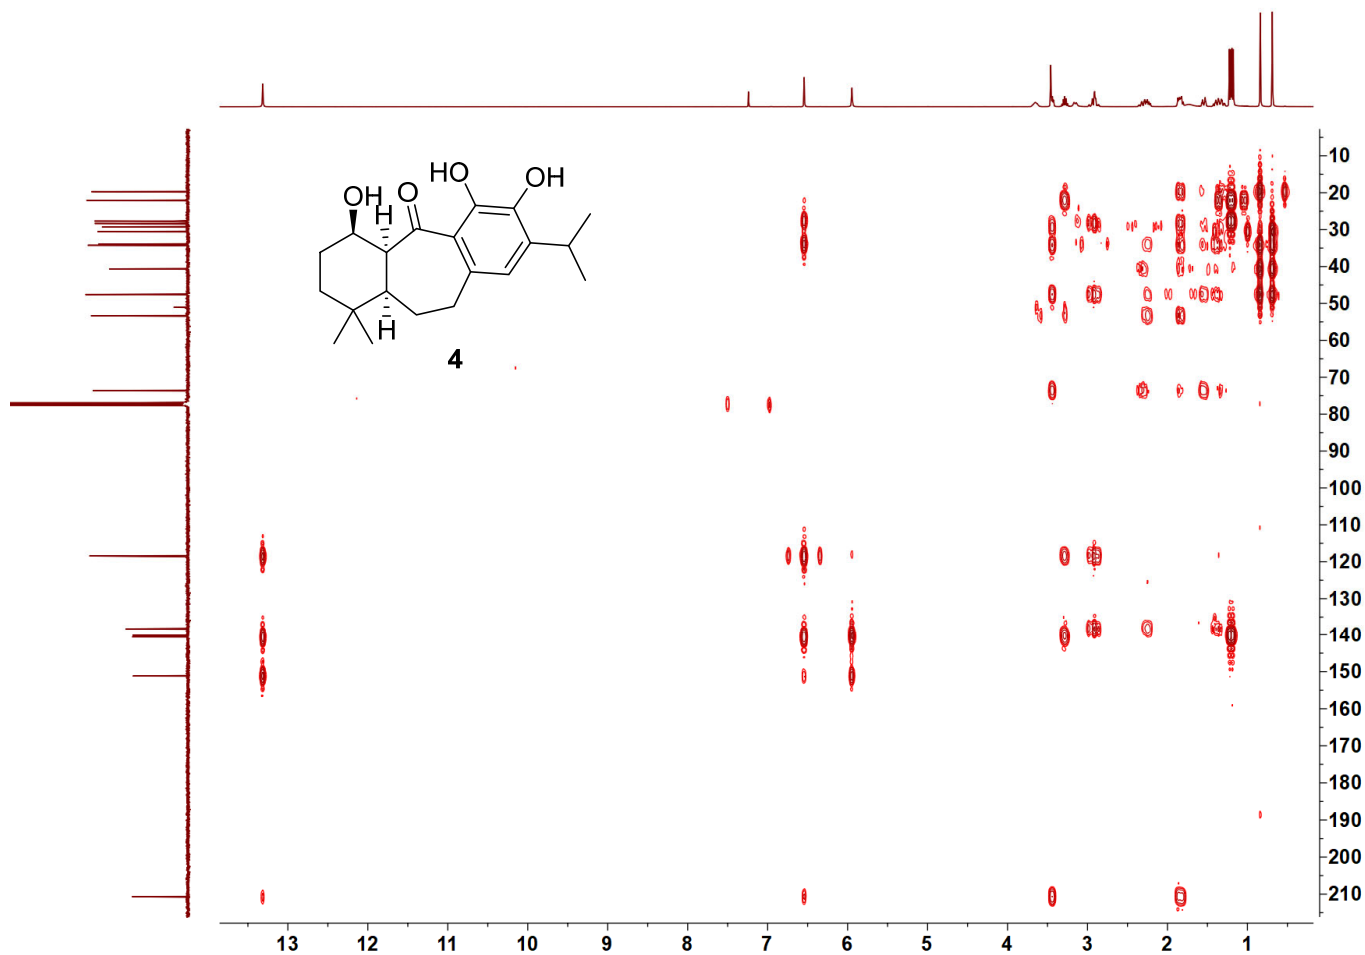

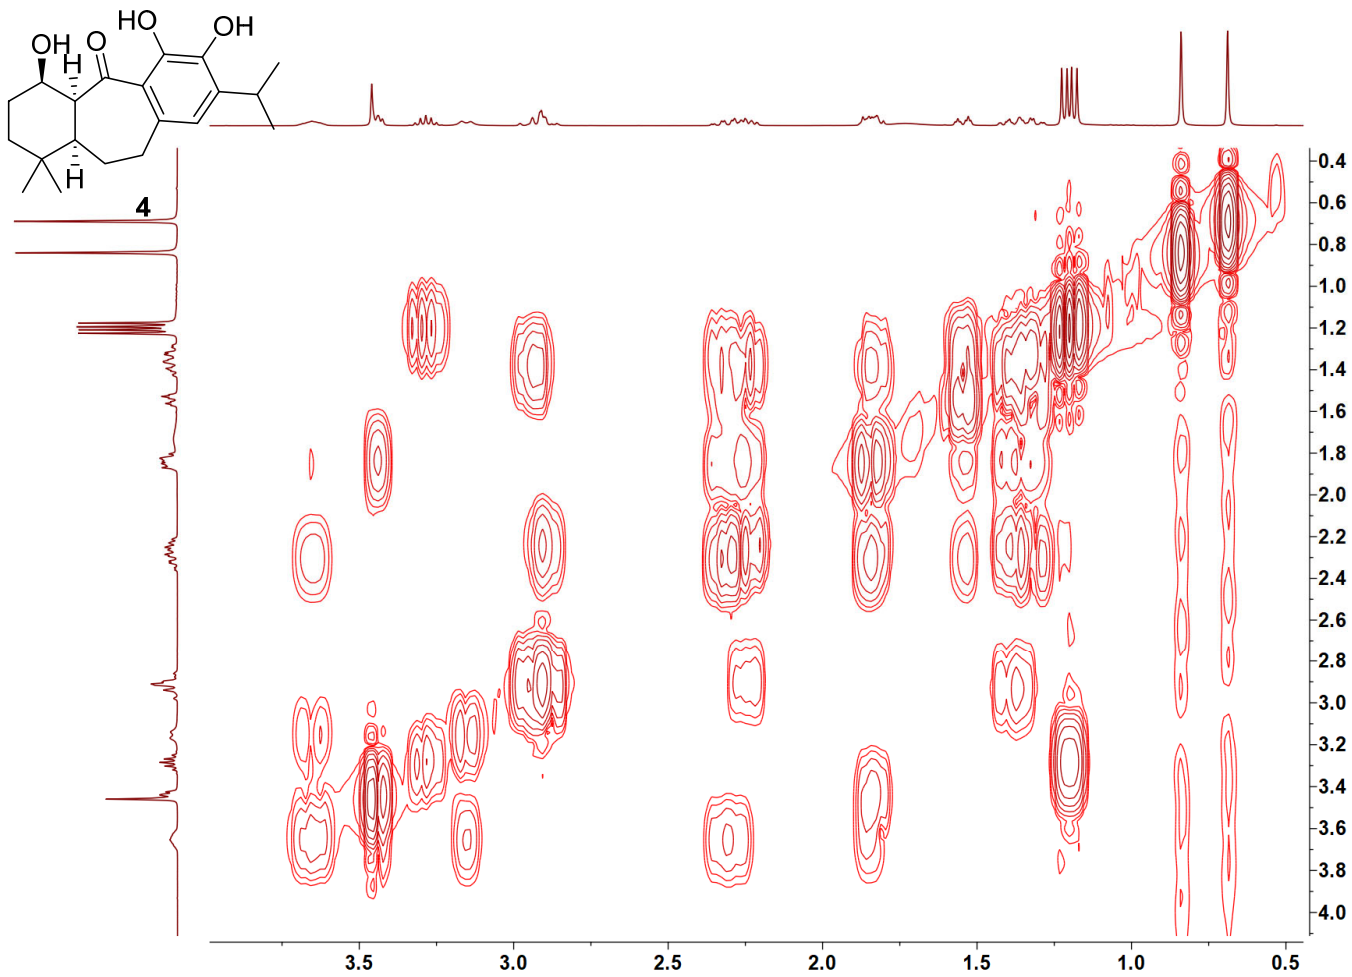

Figure S47.  $^1\text{H}$ - $^1\text{H}$  COSY spectrum of compound **4** (400 MHz, chloroform-*d*)

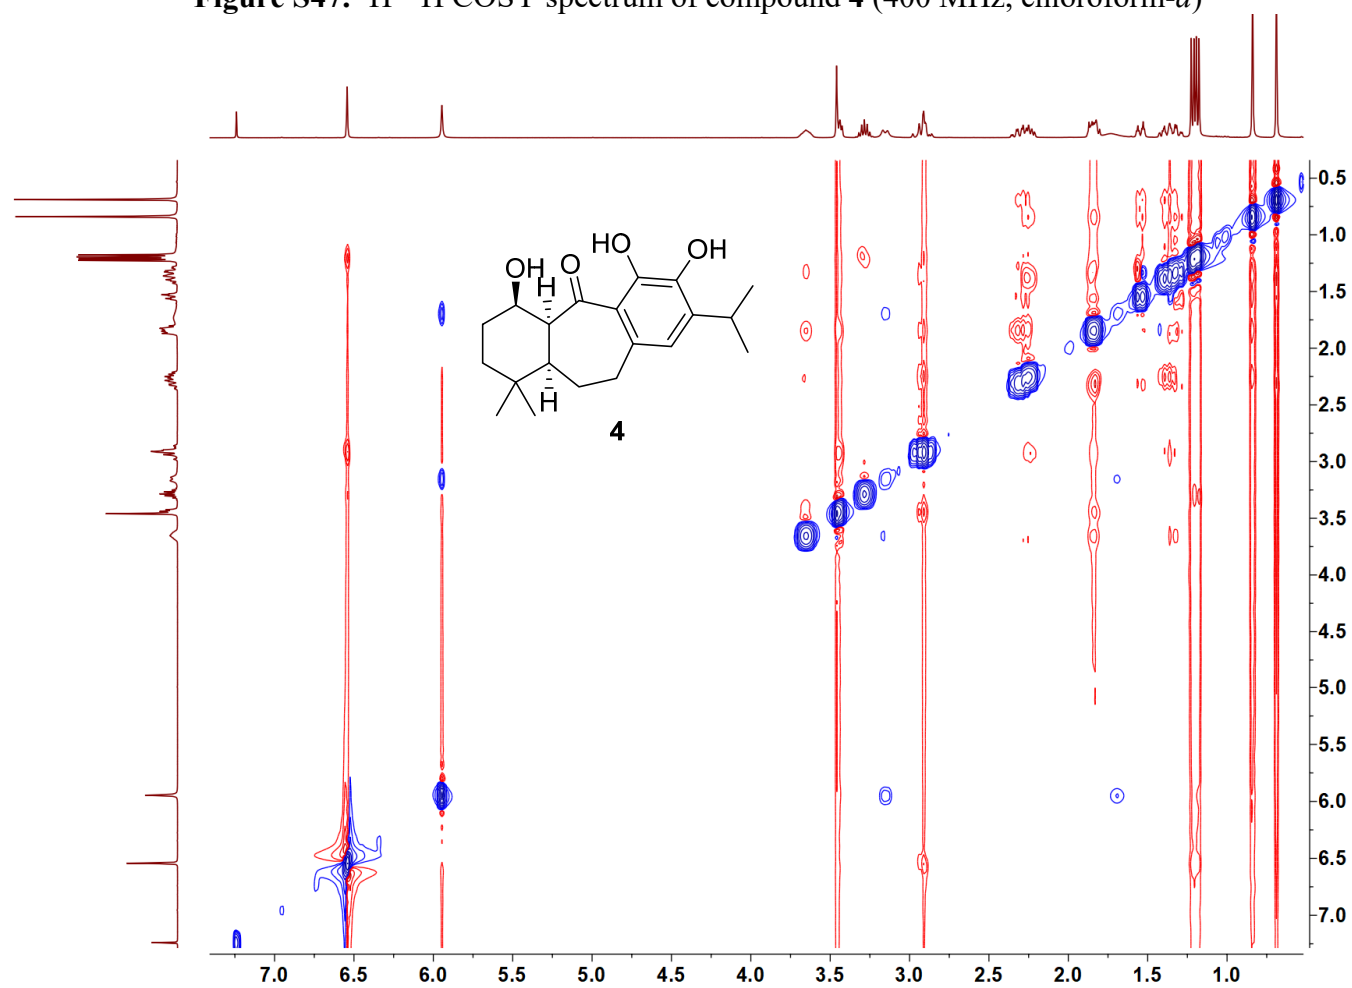

Figure S48. NOESY spectrum of compound **4** (400 MHz, chloroform-*d*)

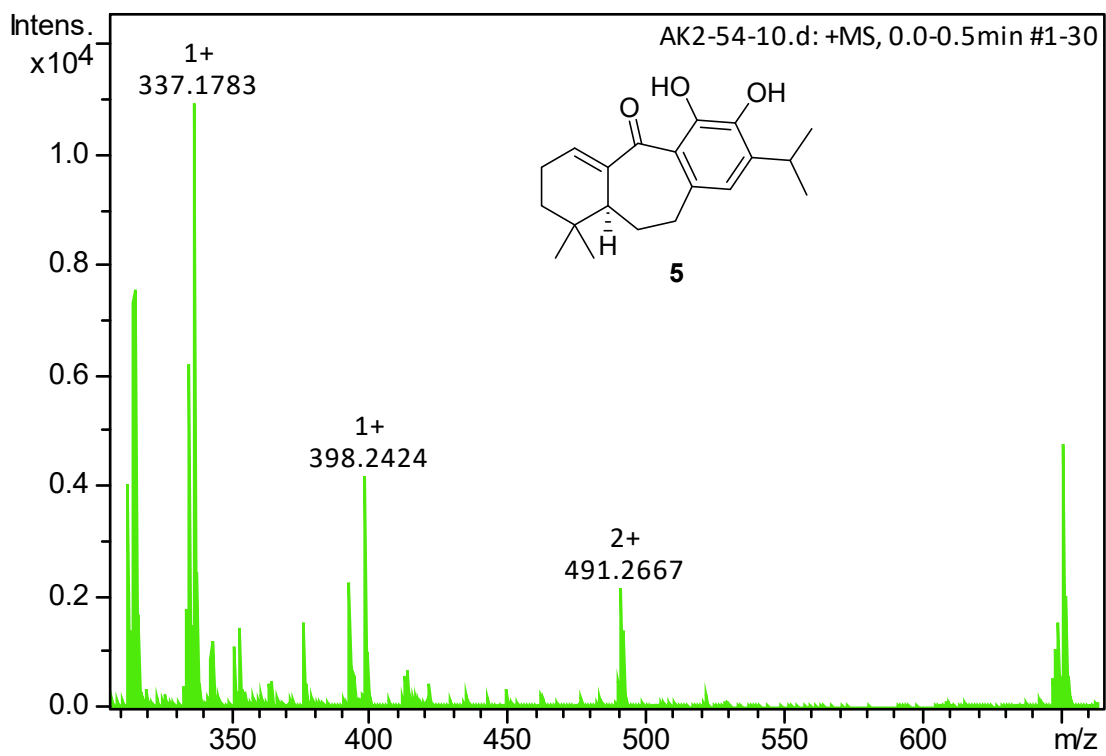

Figure S49. The HRESIMS spectrum of compound **5**

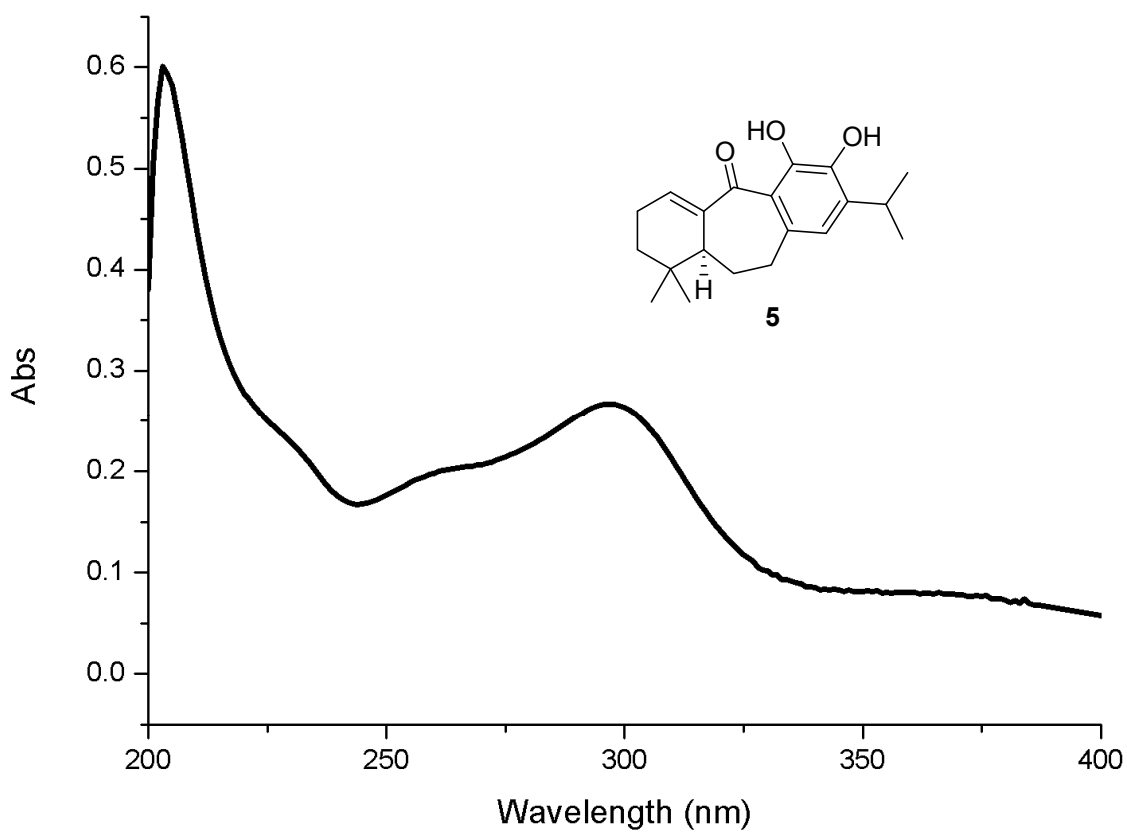

Figure S50. The UV spectrum of compound **5**

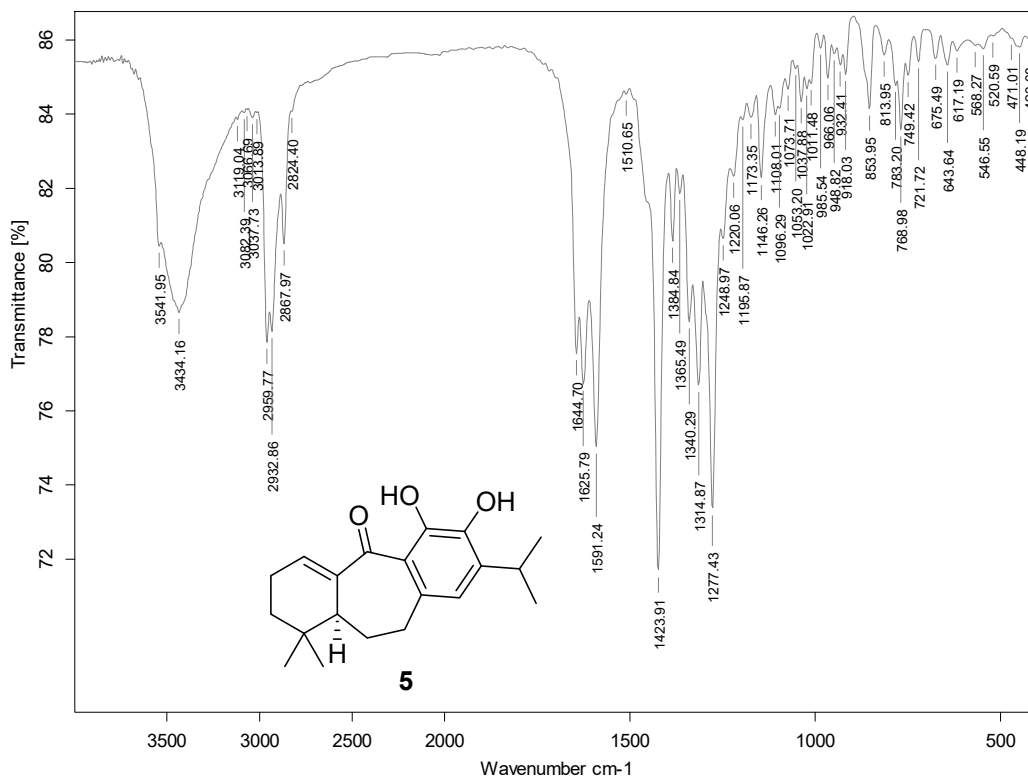

Figure S51. The IR spectrum of compound 5

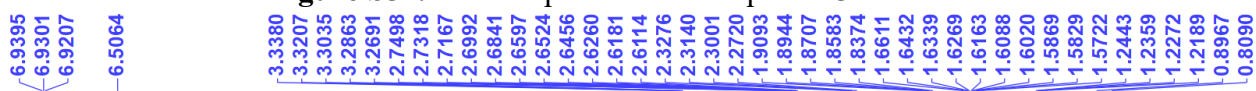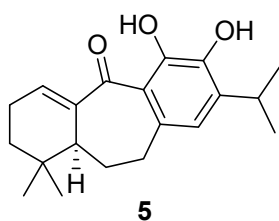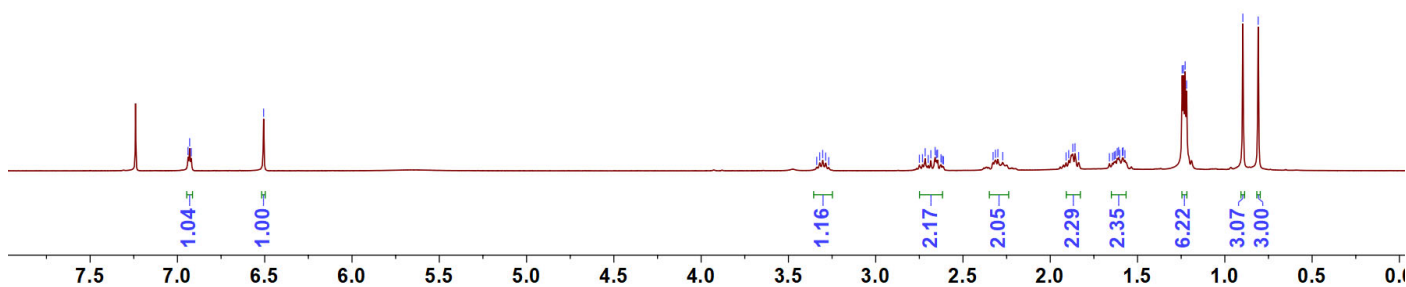

Figure S52. <sup>1</sup>H NMR spectrum of compound 5 (400 MHz, chloroform-d)

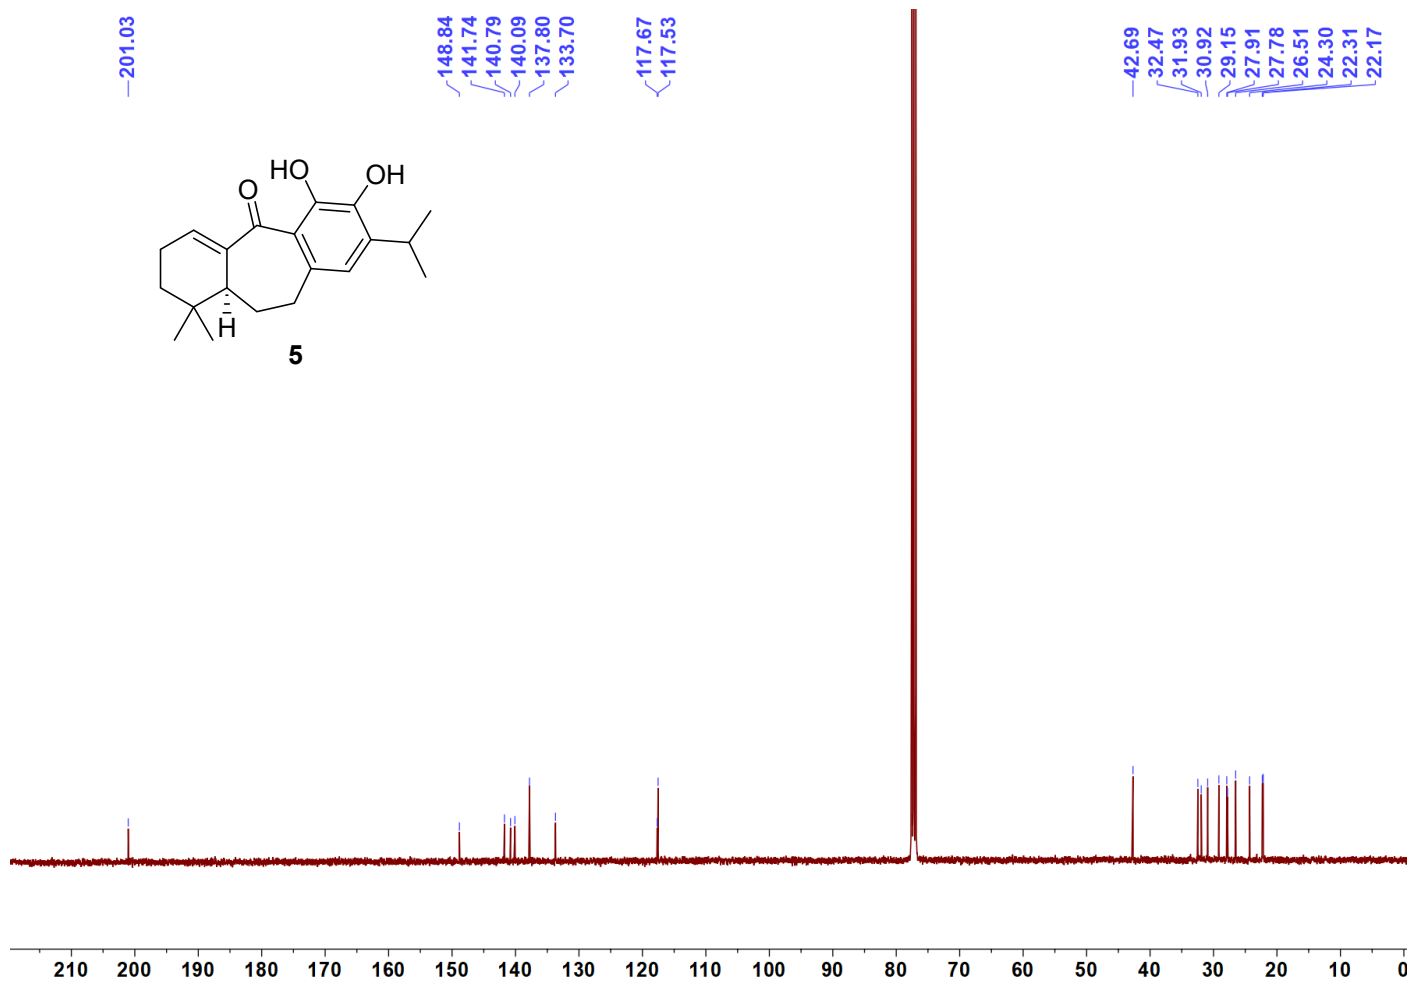

**Figure S53.**  $^{13}\text{C}$  NMR spectrum of compound **5** (100 MHz,  $\text{CDCl}_3$ )

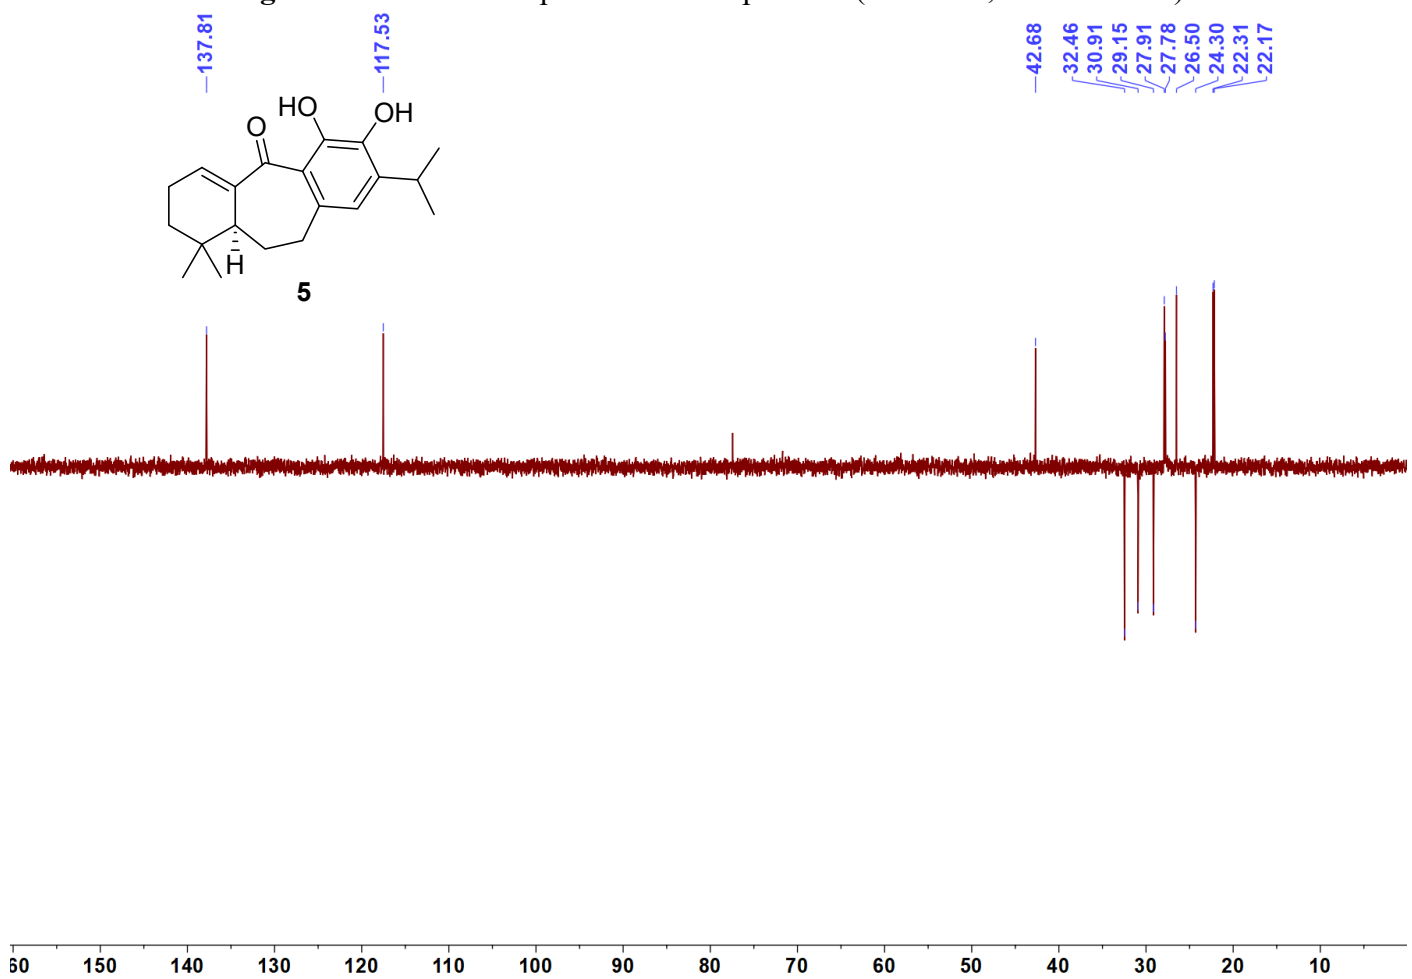

**Figure S54.** DEPT-135 spectrum of compound **5** (100 MHz,  $\text{CDCl}_3$ )

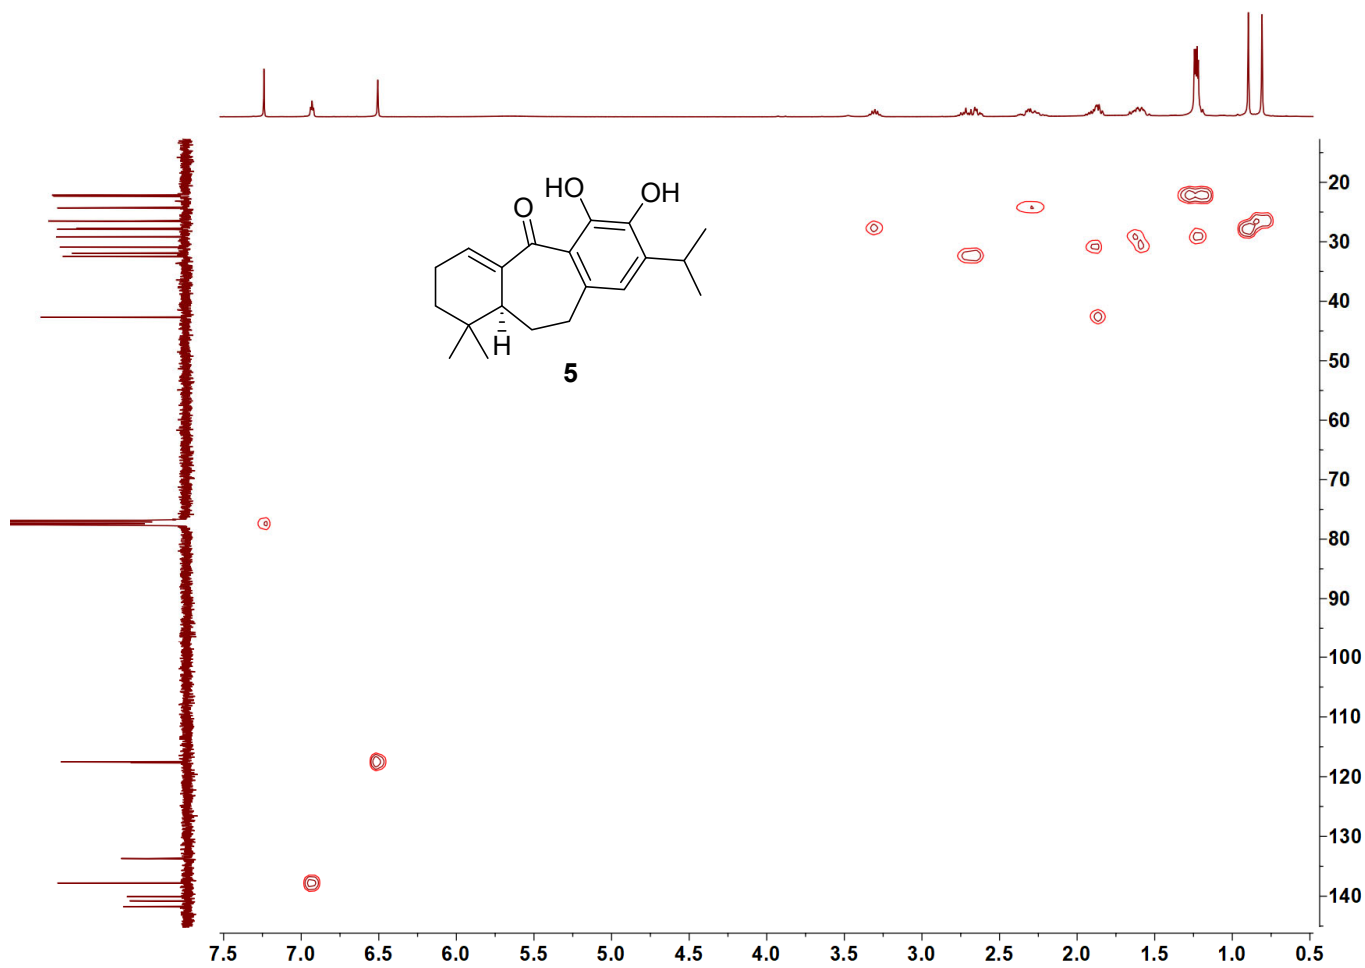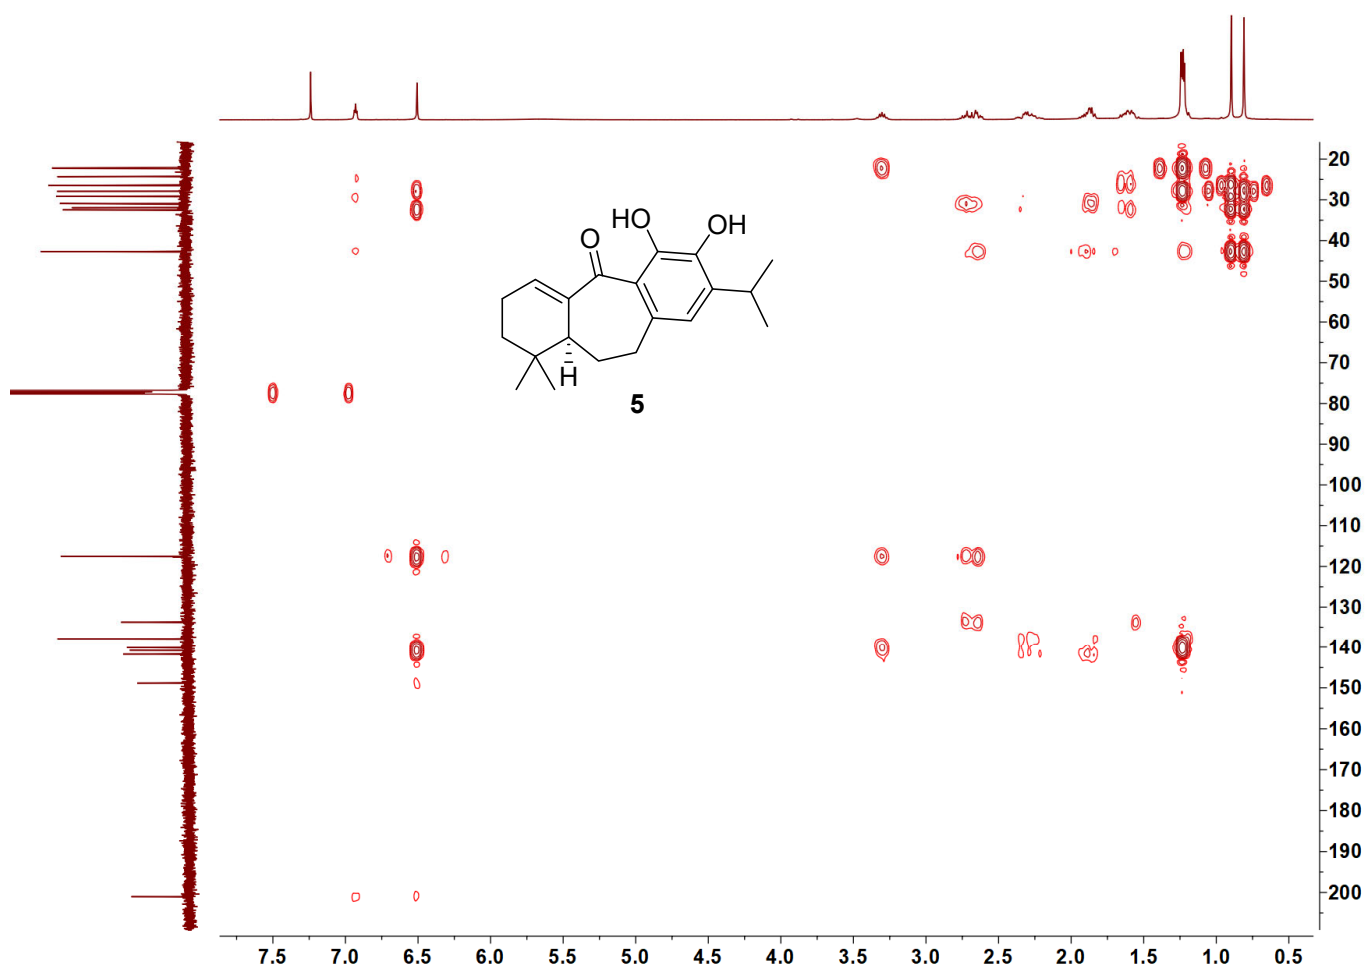

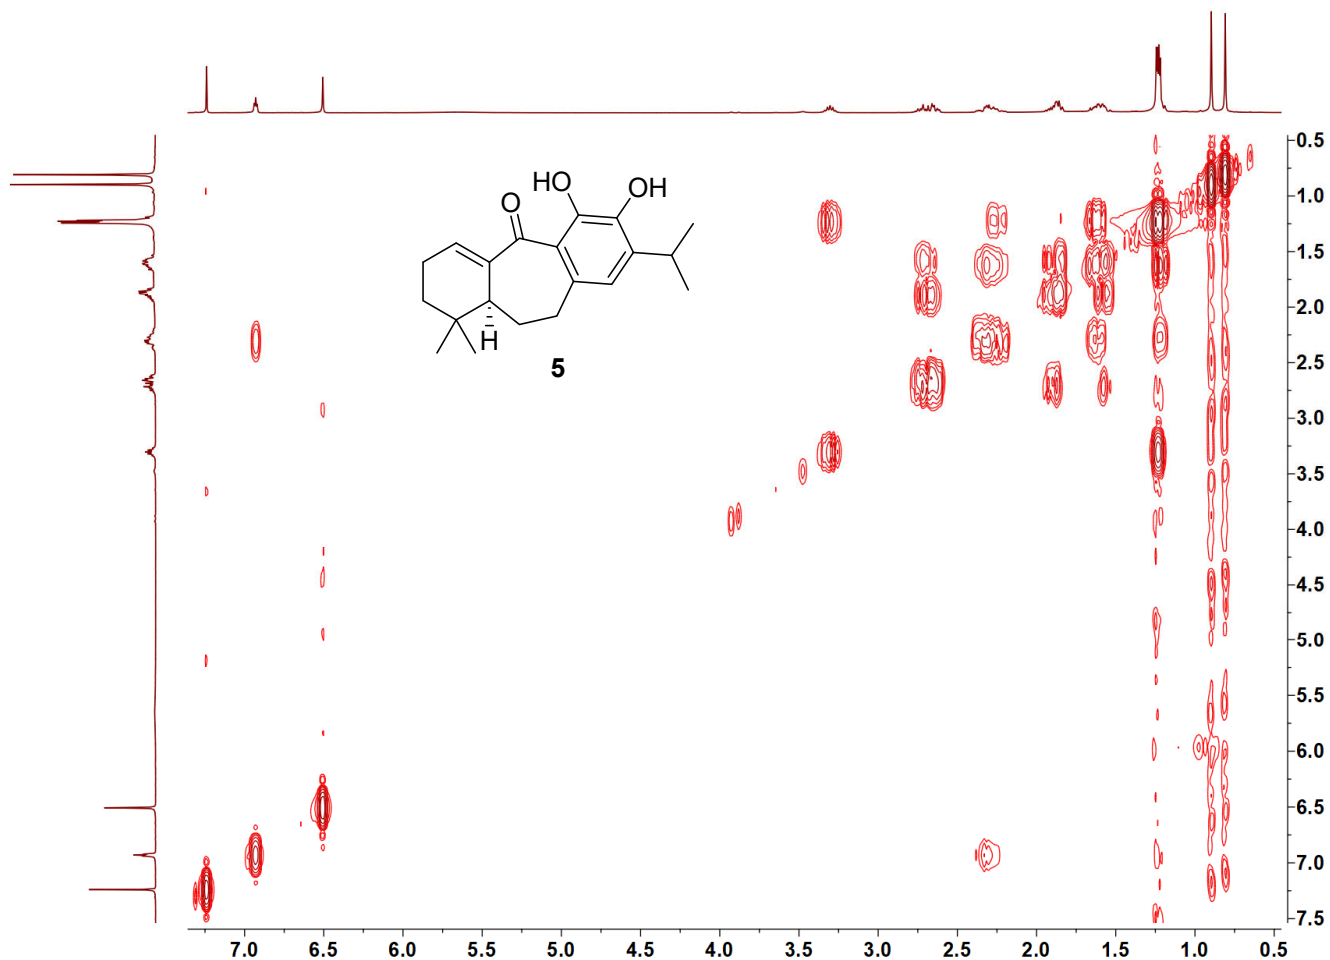

**Figure S57.**  $^1\text{H}$ - $^1\text{H}$  COSY spectrum of compound **5** (400 MHz, chloroform-*d*)

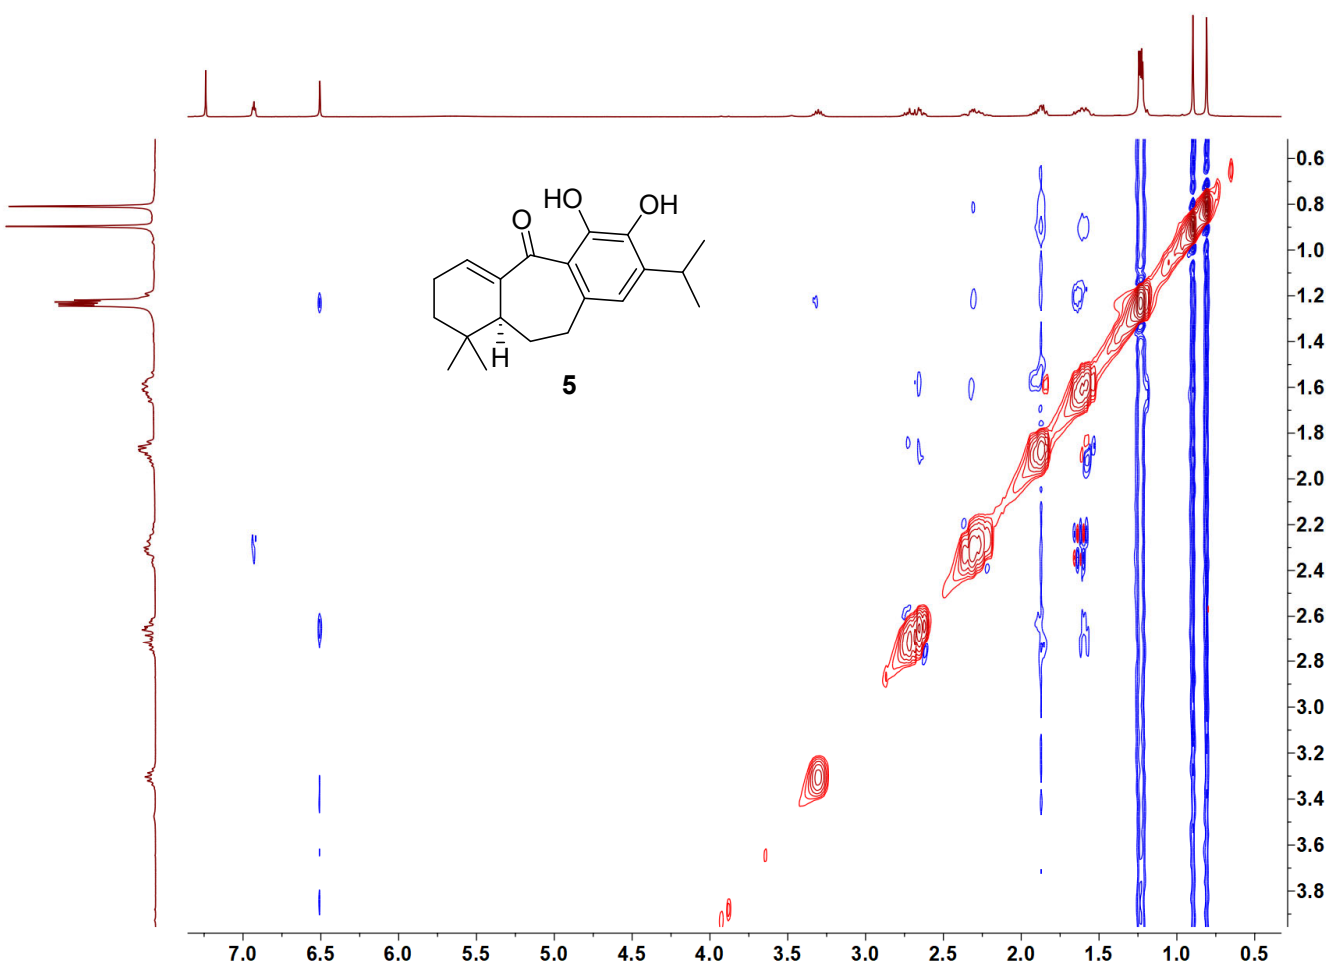

**Figure S58.** NOESY spectrum of compound **5** (400 MHz, chloroform-*d*)



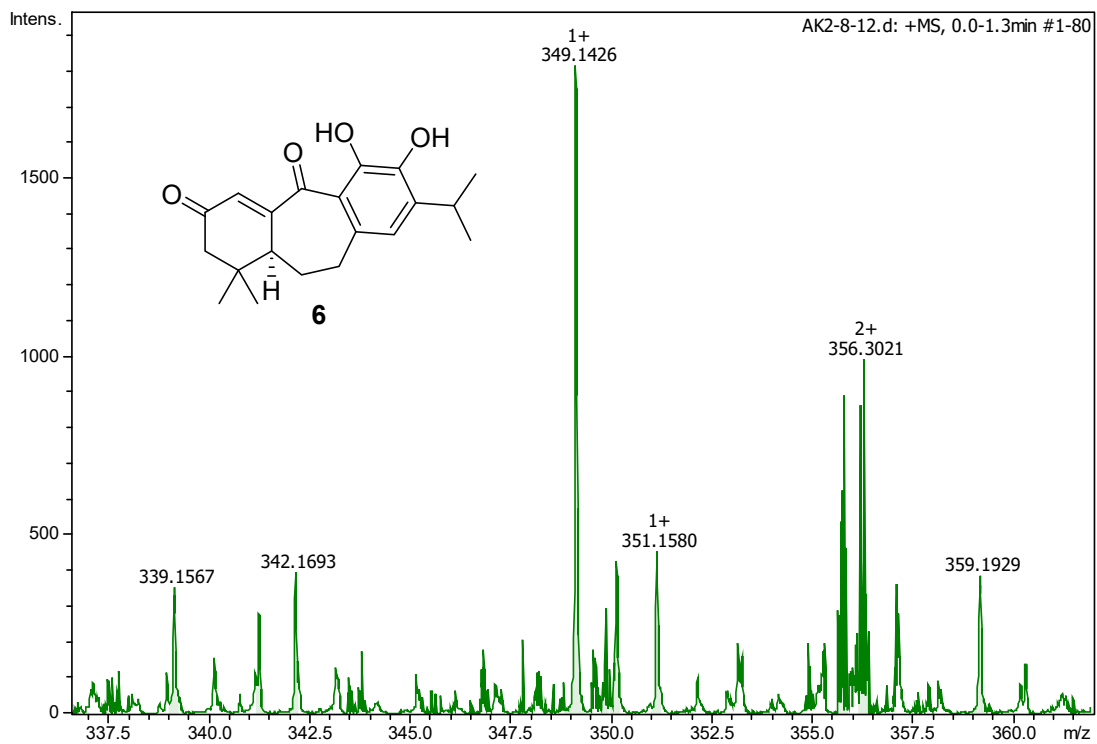

Figure S59. The HRESIMS spectrum of compound 6

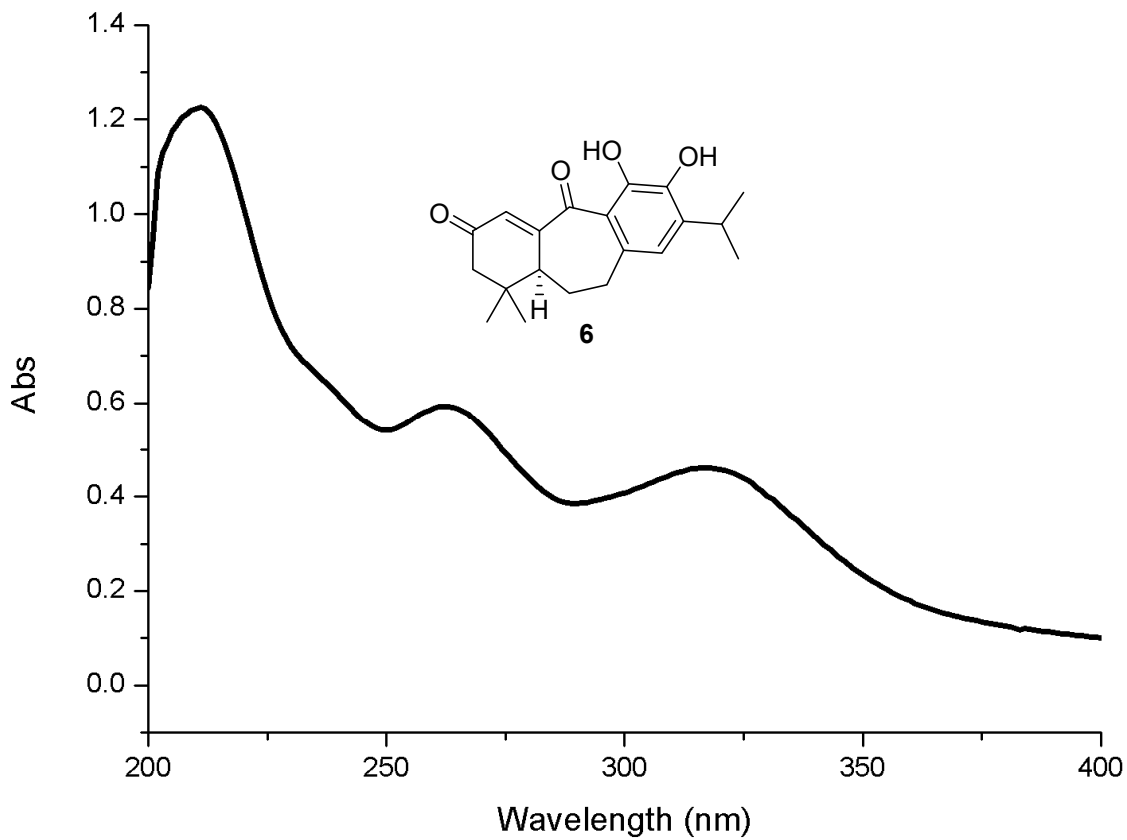

Figure S60. The UV spectrum of compound 6

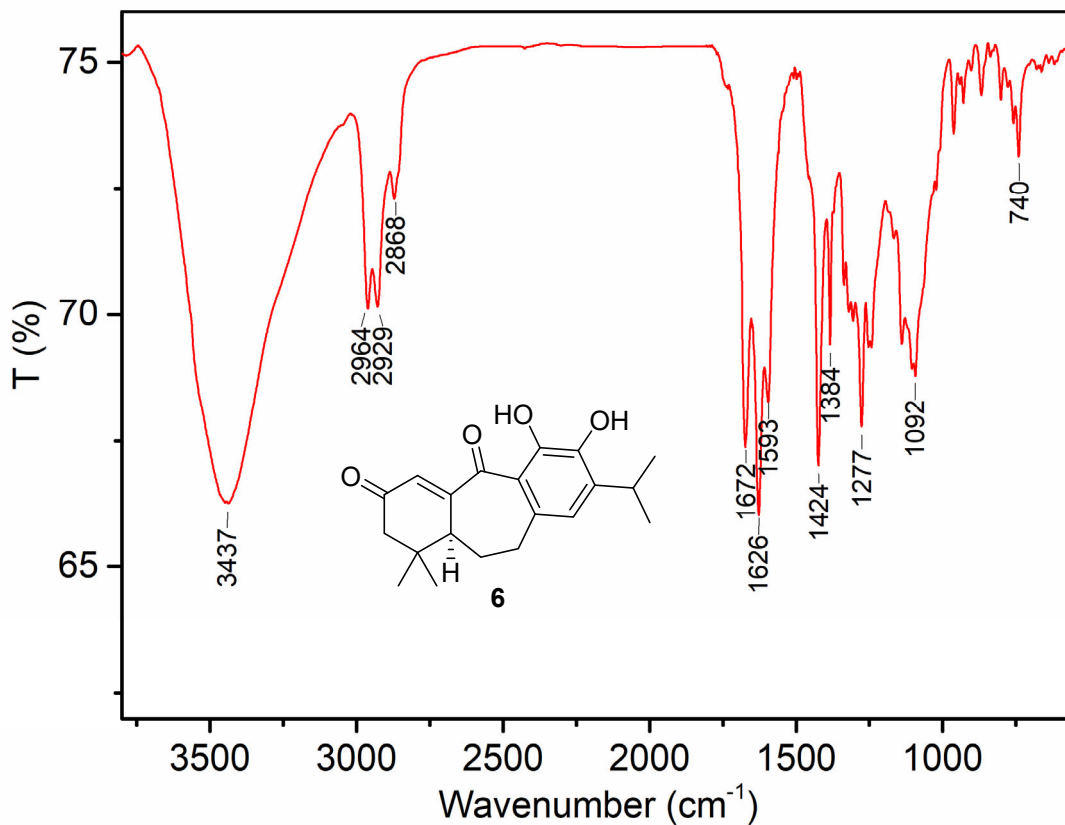

Figure S61. The IR spectrum of compound **6**

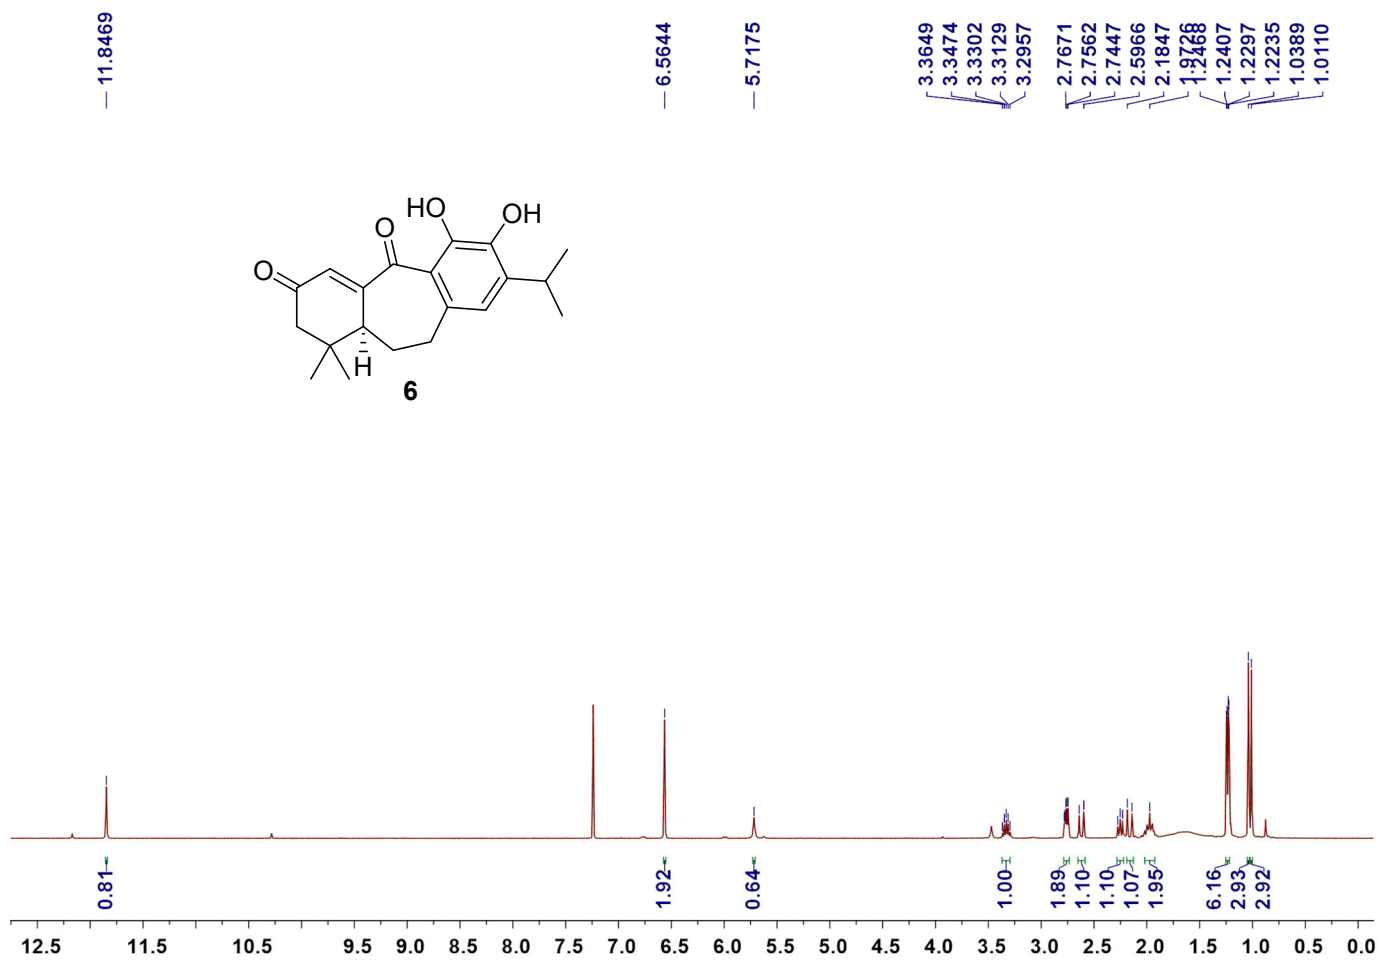

Figure S62.  $^1\text{H}$  NMR spectrum of compound **6** (400 MHz,  $\text{chloroform-d}$ )

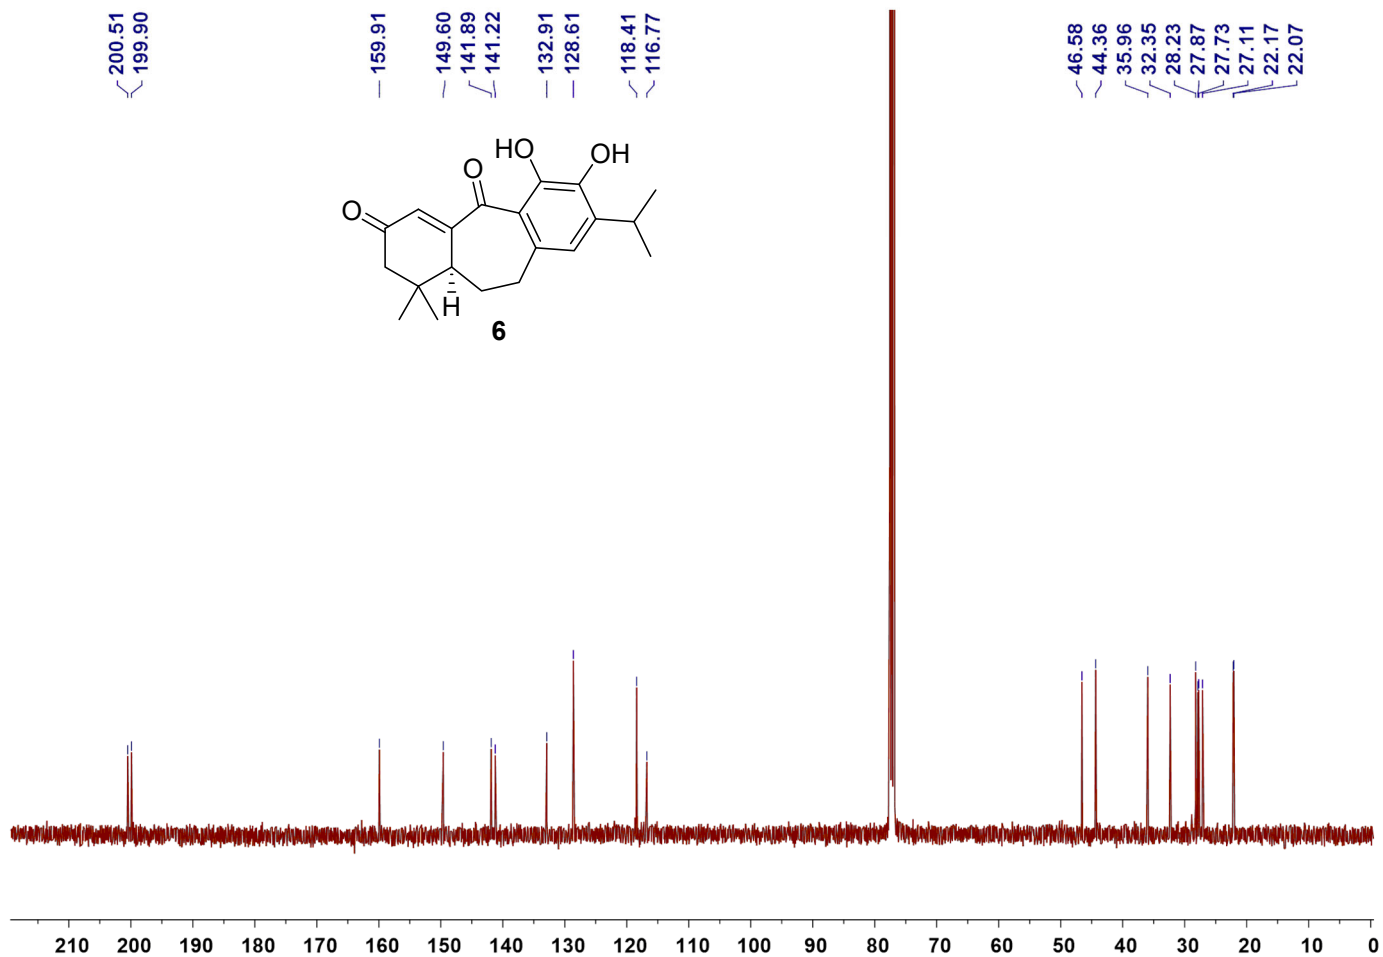

Figure S63.  $^{13}\text{C}$  NMR spectrum of compound 6 (100 MHz, chloroform-*d*)

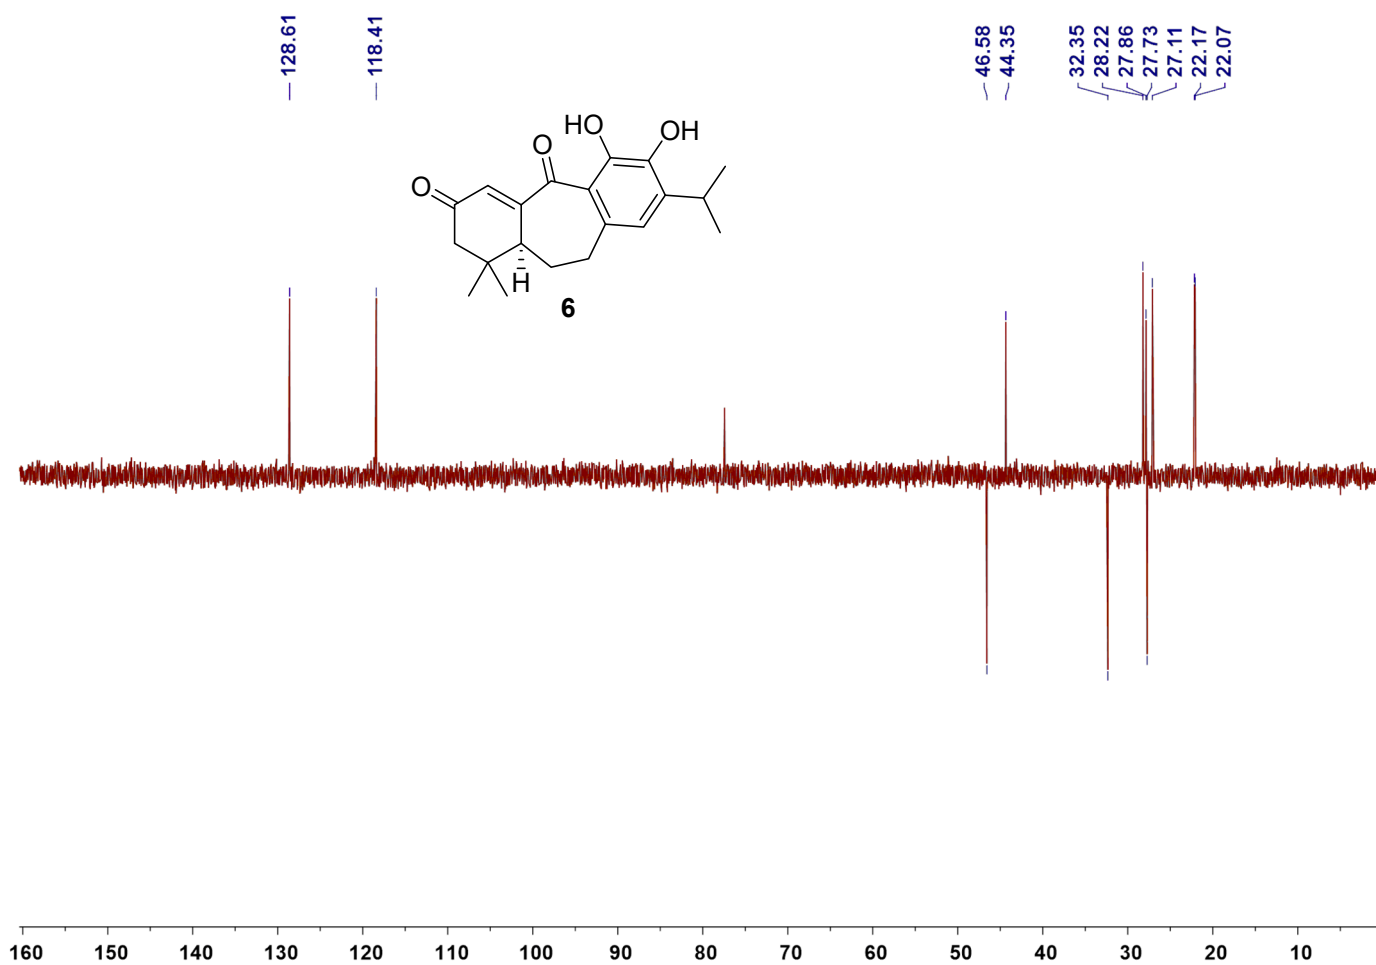

Figure S64. DEPT-135 spectrum of compound 6 (100 MHz, chloroform-*d*)

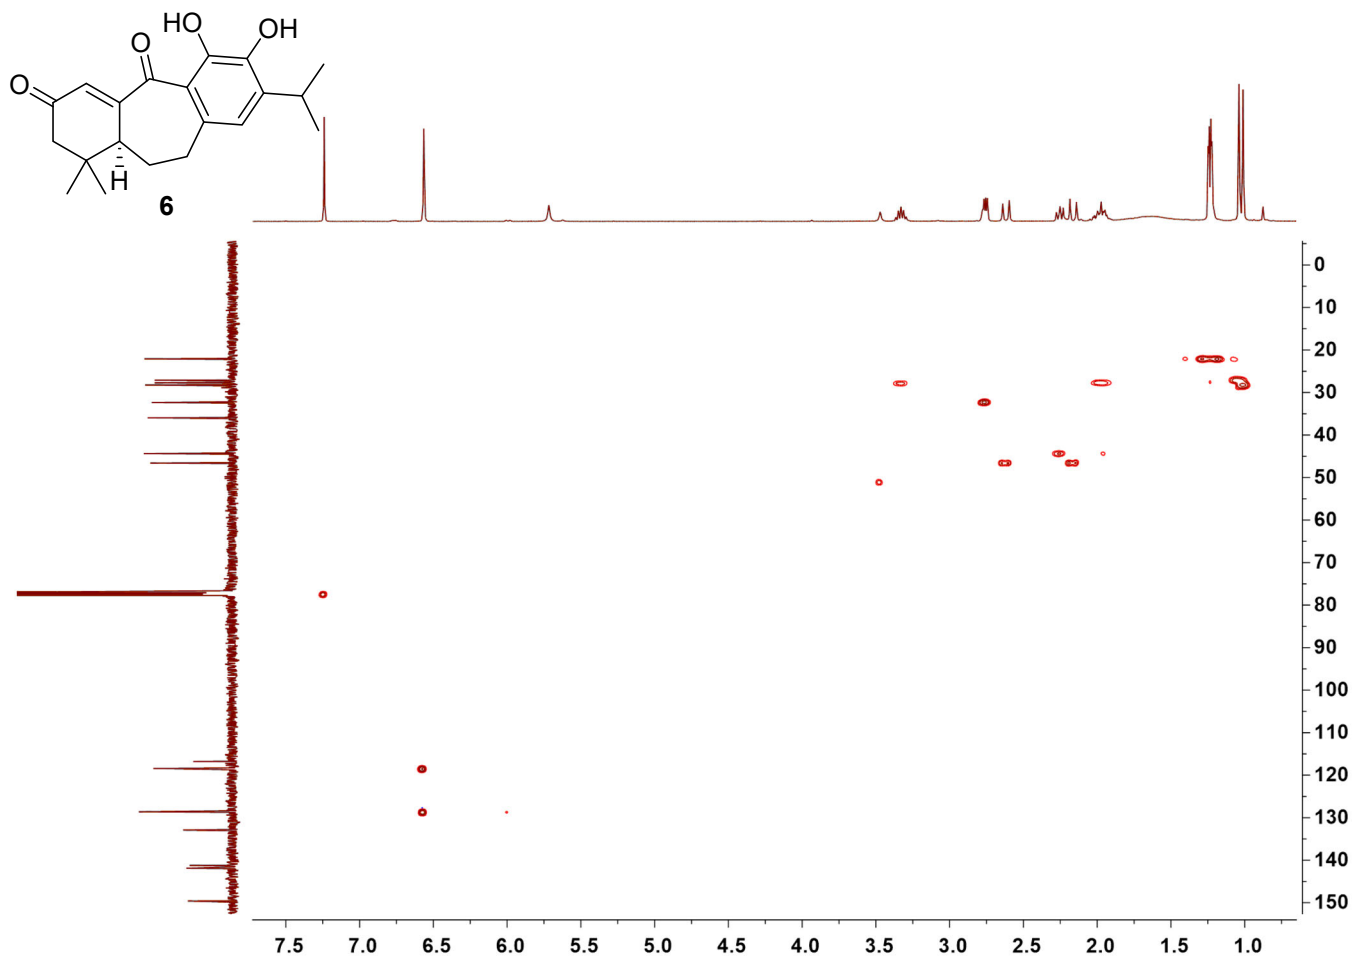

Figure S65. HSQC spectrum of compound 6 ( $^1\text{H}$ : 400 MHz,  $^{13}\text{C}$ : 100 MHz, chloroform-*d*)

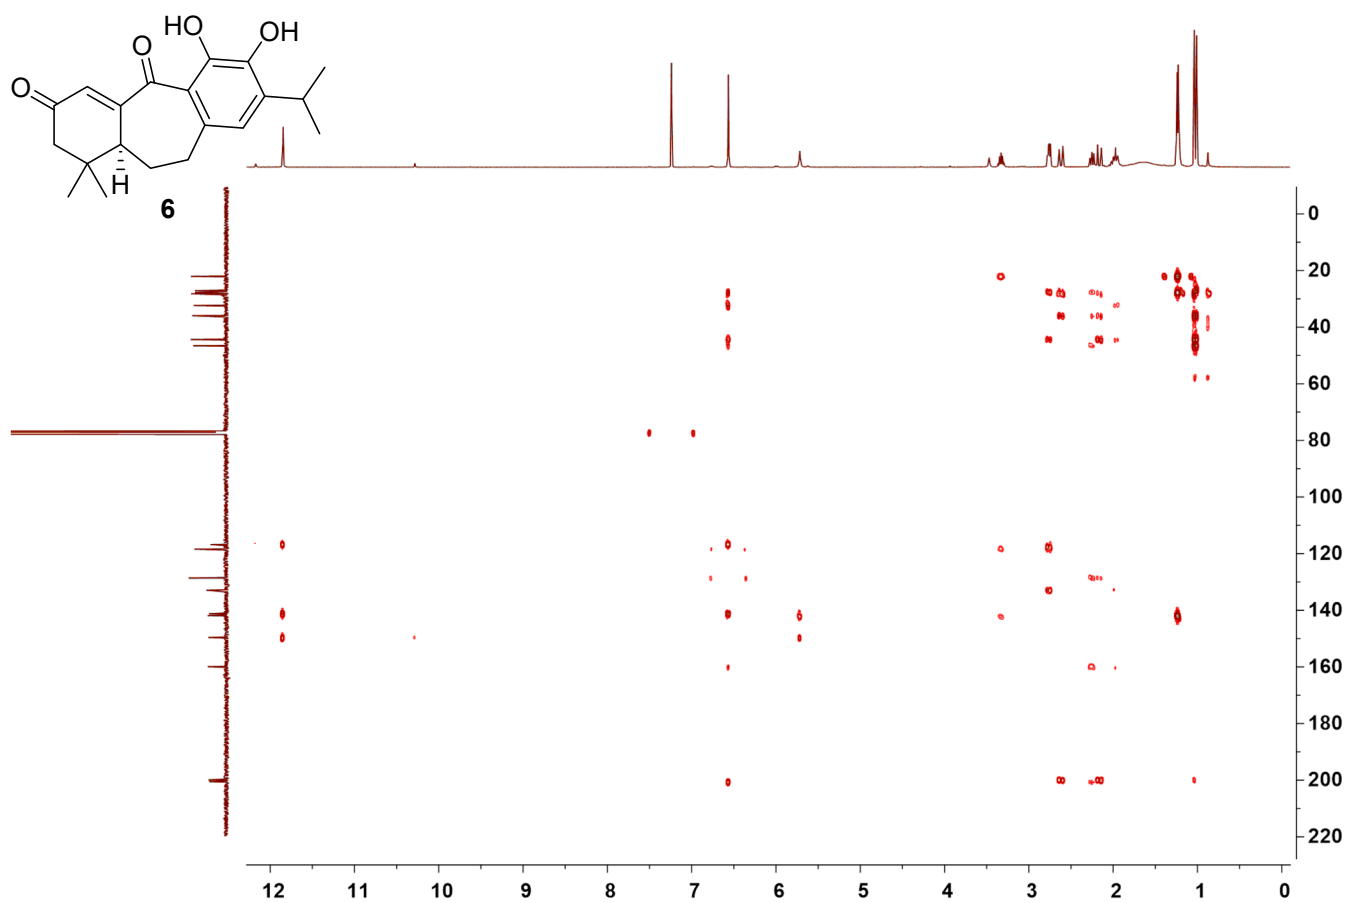

Figure S66. HMBC spectrum of compound 6 ( $^1\text{H}$ : 400 MHz,  $^{13}\text{C}$ : 100 MHz, chloroform-*d*)

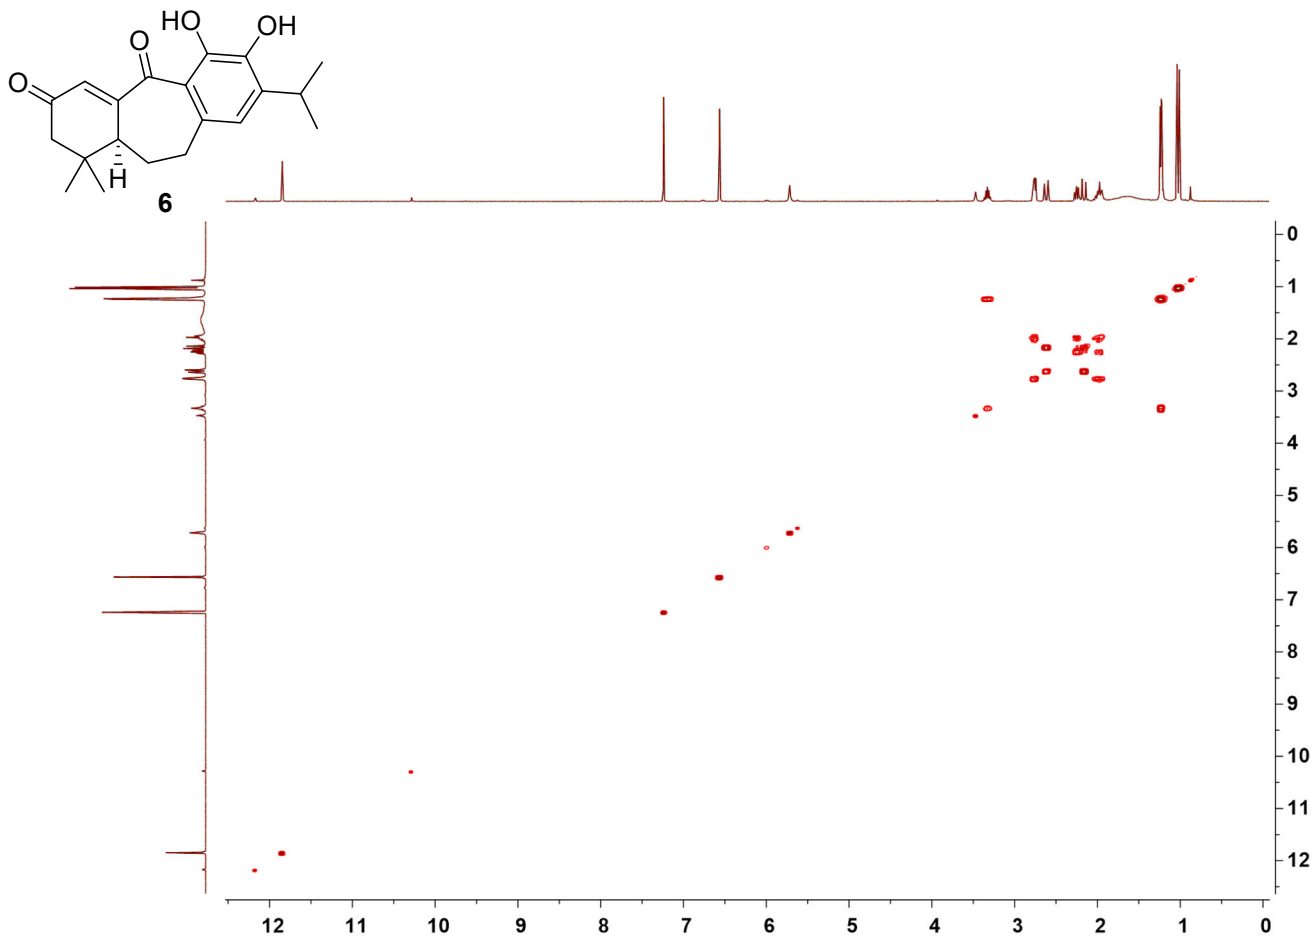

Figure S67.  $^1\text{H}$ - $^1\text{H}$  COSY spectrum of compound 6 (400 MHz, chloroform-*d*)

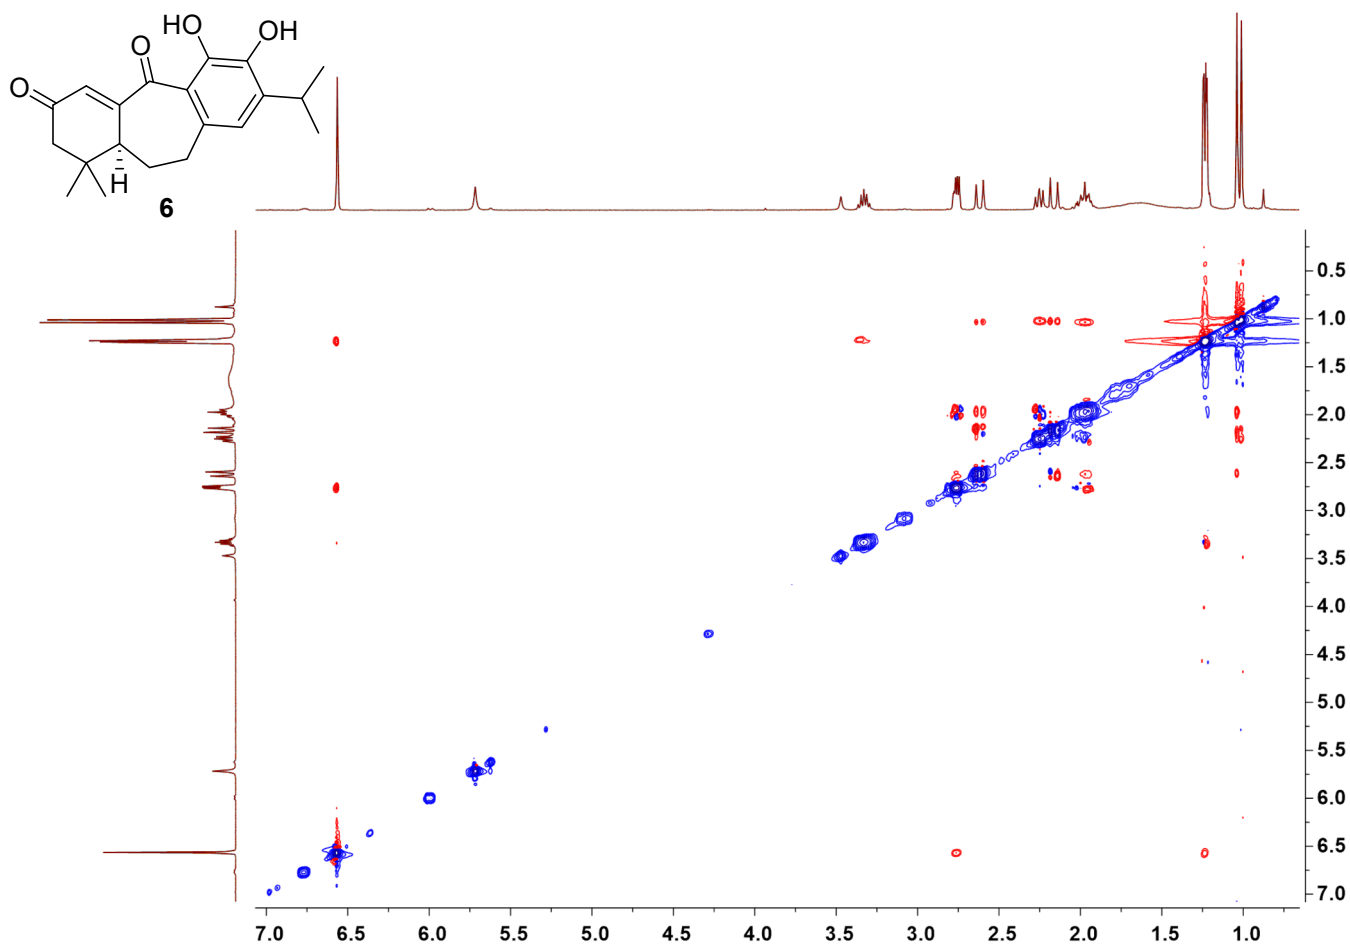

Figure S68. NOESY spectrum of compound 6 (400 MHz, chloroform-*d*)

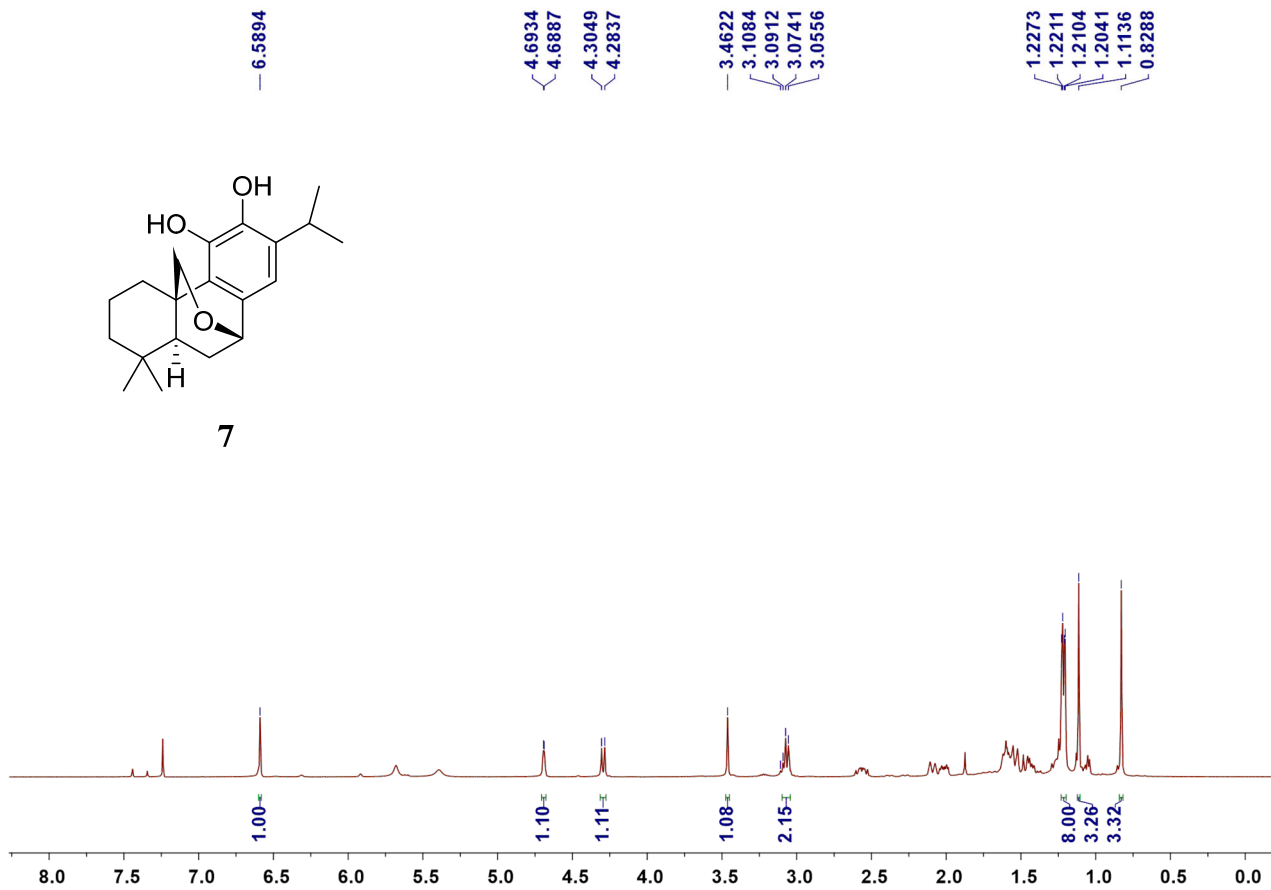

**Figure S69.**  $^1\text{H}$  NMR spectrum of compound **7** (400 MHz, chloroform-*d*)

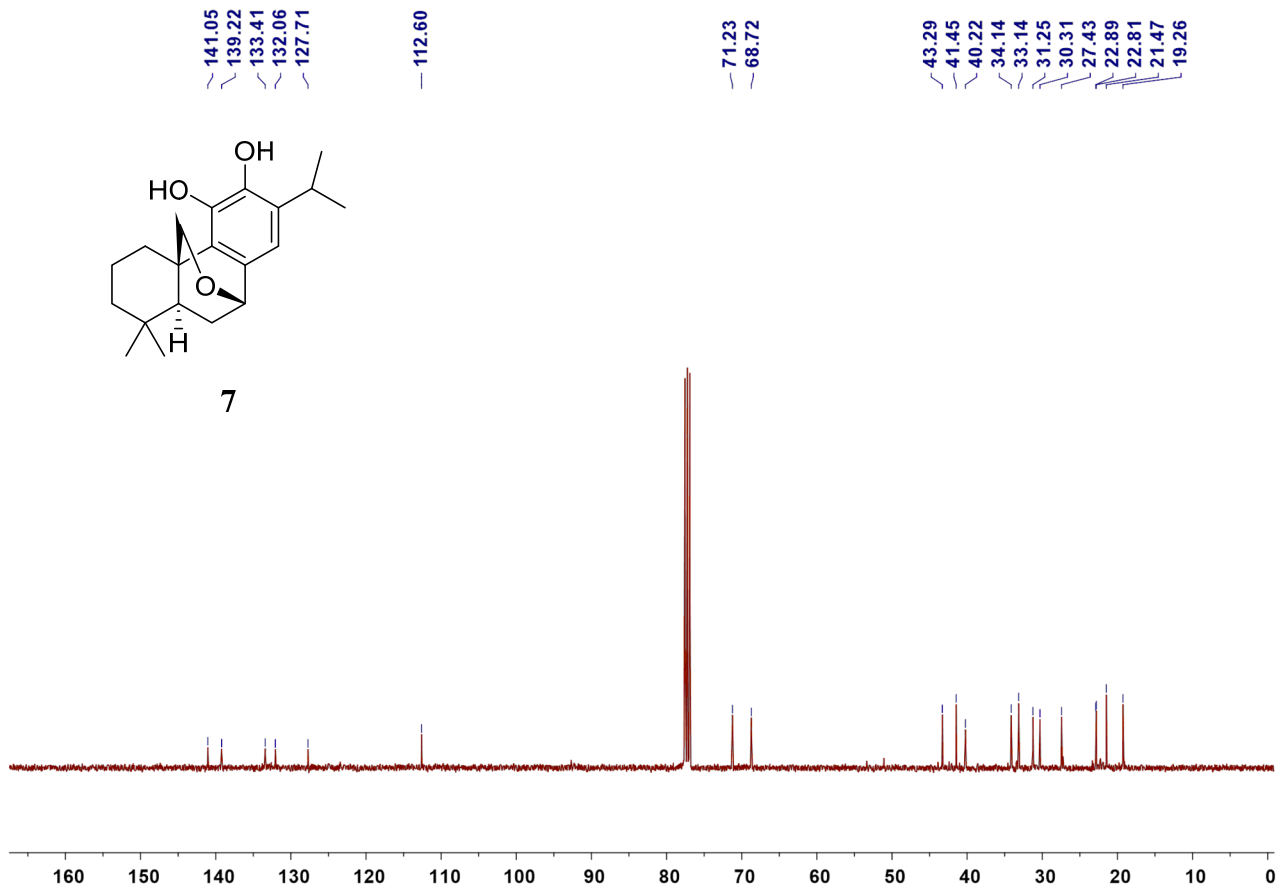

**Figure S70.**  $^{13}\text{C}$  NMR spectrum of compound **7** (100 MHz, chloroform-*d*)
